# Supplementary material
Source: publisher figshare collection journal article supplement (https://frontiersin.figshare.com/ndownloader/files/35152045)
Supplement: Supplementary file 1 [file 35152045]

## Sheet: Protistan community_ASVs
Supplementary Table 2A. Functional classification of the protistan community in relation to their trophic modes based on read abundances of 18S rRNA gene amplicon sequencing.
ASV category	Taxon	Trophic mode	Reference	Equatorial undercurrent upwelling (EUC) region									Eastern region
				St. RT	St. 2	St. 3	St. 4	St. 5	St. 6	St. 7	St. 29		St. 1	St. 9	St. 10	St. 11	St. 12	St. 15	St. 16	St. 18	St. 20	St. 22	St. 24	St. 26	St. 27	St. 28	St. 14
D_0__Eukaryota;D_1__Amoebozoa;D_2__Discosea;D_3__Flabellinia;D_4__Vannellida;D_5__Platyamoeba;D_6__Platyamoeba contorta	Others	H	Simpson and Roger (2004)	0	0	0	0	0	0	0	0		0	0	0	12	5	8	0	0	0	0	0	0	0	0	18
D_0__Eukaryota;D_1__Amoebozoa;D_2__Discosea;D_3__Longamoebia;D_4__Centramoebida;D_5__Acanthamoeba;__	Others	H	Simpson and Roger (2004)	0	0	0	0	0	0	0	0		0	0	0	0	0	0	0	0	0	0	0	0	0	2	0
D_0__Eukaryota;D_1__Amoebozoa;D_2__Tubulinea;D_3__Leptomyxida;D_4__Flabellula;__;__	Others	H	Simpson and Roger (2004)	0	0	0	0	3	0	0	0		0	0	0	0	0	0	0	0	0	0	0	0	0	0	0
D_0__Eukaryota;D_1__Archaeplastida;D_2__Chloroplastida;D_3__Charophyta;D_10__Solanales;Ambiguous_taxa;__	Chlorophyta	A	Schneider et al. (2020)	0	0	0	0	0	0	0	0		0	0	0	0	0	0	0	0	0	0	0	0	0	0	0
D_0__Eukaryota;D_1__Archaeplastida;D_2__Chloroplastida;D_3__Charophyta;D_8__Spermatophyta;D_9__Magnoliophyta;D_10__Phaseoleae environmental sample	Chlorophyta	A	Schneider et al. (2020)	0	0	0	0	0	0	0	0		0	2	0	0	0	0	0	0	7	0	0	0	0	0	0
D_0__Eukaryota;D_1__Archaeplastida;D_2__Chloroplastida;D_3__Charophyta;D_9__Polypodiales;D_10__Lonchitis;D_11__Lonchitis hirsuta	Chlorophyta	A	Schneider et al. (2020)	0	0	6	0	0	0	0	0		0	0	0	0	0	0	0	0	0	0	0	0	0	0	0
D_0__Eukaryota;D_1__Archaeplastida;D_2__Chloroplastida;D_3__Chlorophyta;Ambiguous_taxa;Ambiguous_taxa;Ambiguous_taxa	Chlorophyta	A	Schneider et al. (2020)	0	0	0	0	0	0	0	0		0	3	0	0	0	0	0	0	0	0	0	0	0	0	0
D_0__Eukaryota;D_1__Archaeplastida;D_2__Chloroplastida;D_3__Chlorophyta;D_4__Clade IX;Ambiguous_taxa;Ambiguous_taxa	Chlorophyta	A	Schneider et al. (2020)	0	0	0	0	0	0	0	0		0	0	0	0	0	5	0	0	0	0	0	0	0	0	0
D_0__Eukaryota;D_1__Archaeplastida;D_2__Chloroplastida;D_3__Chlorophyta;D_4__Clade IX;__;__	Chlorophyta	A	Schneider et al. (2020)	0	0	14	20	8	0	13	0		25	24	103	38	48	50	11	20	16	14	26	0	0	22	35
D_0__Eukaryota;D_1__Archaeplastida;D_2__Chloroplastida;D_3__Chlorophyta;D_4__Clade VII;Ambiguous_taxa;Ambiguous_taxa	Chlorophyta	A	Schneider et al. (2020)	5	0	0	0	0	0	0	0		0	0	0	0	0	0	8	0	14	0	0	0	0	0	0
D_0__Eukaryota;D_1__Archaeplastida;D_2__Chloroplastida;D_3__Chlorophyta;D_4__Clade VII;D_5__Subclade A;Ambiguous_taxa	Chlorophyta	A	Schneider et al. (2020)	0	1204	1277	649	734	712	1481	236		5403	82	733	57	161	439	23	112	304	542	666	0	55	1105	5965
D_0__Eukaryota;D_1__Archaeplastida;D_2__Chloroplastida;D_3__Chlorophyta;D_4__Clade VII;D_5__Subclade A;D_6__uncultured eukaryote	Chlorophyta	A	Schneider et al. (2020)	0	0	36	0	64	0	9	0		0	0	0	0	6	0	0	0	0	0	39	0	0	0	0
D_0__Eukaryota;D_1__Archaeplastida;D_2__Chloroplastida;D_3__Chlorophyta;D_4__Clade VII;D_5__Subclade A;__	Chlorophyta	A	Schneider et al. (2020)	365	2676	1060	2631	632	2315	1230	889		26250	2772	10767	2259	4161	6233	1879	1971	5092	12189	14031	446	892	7462	23995
D_0__Eukaryota;D_1__Archaeplastida;D_2__Chloroplastida;D_3__Chlorophyta;D_4__Clade VII;D_5__Subclade B;Ambiguous_taxa	Chlorophyta	A	Schneider et al. (2020)	489	3026	11828	14338	10145	4941	11616	5589		21196	7778	7414	3635	4602	15859	1647	2057	6379	9577	10769	297	1371	6231	10771
D_0__Eukaryota;D_1__Archaeplastida;D_2__Chloroplastida;D_3__Chlorophyta;D_4__Clade VII;D_5__Subclade B;D_6__prasinophyte sp. RCC2339 (clade VIIB2)	Chlorophyta	A	Schneider et al. (2020)	0	0	0	0	0	0	0	0		0	0	0	0	0	0	0	0	5	0	0	0	0	0	0
D_0__Eukaryota;D_1__Archaeplastida;D_2__Chloroplastida;D_3__Chlorophyta;D_4__Clade VII;D_5__Subclade B;__	Chlorophyta	A	Schneider et al. (2020)	0	0	3	0	0	0	0	0		16	0	0	0	0	0	0	33	0	0	0	0	4	0	0
D_0__Eukaryota;D_1__Archaeplastida;D_2__Chloroplastida;D_3__Chlorophyta;D_4__Mamiellophyceae;Ambiguous_taxa;Ambiguous_taxa	Chlorophyta	A	Schneider et al. (2020)	0	0	4	0	0	0	0	0		0	0	0	0	0	0	0	0	0	0	0	0	0	0	0
D_0__Eukaryota;D_1__Archaeplastida;D_2__Chloroplastida;D_3__Chlorophyta;D_4__Mamiellophyceae;D_5__DSGM-81;Ambiguous_taxa	Chlorophyta	A	Schneider et al. (2020)	0	8	0	0	0	0	0	0		0	0	0	0	0	0	0	0	0	0	0	0	0	0	0
D_0__Eukaryota;D_1__Archaeplastida;D_2__Chloroplastida;D_3__Chlorophyta;D_4__Mamiellophyceae;D_5__DSGM-81;__	Chlorophyta	A	Schneider et al. (2020)	0	0	5	0	0	0	0	0		0	0	0	0	0	0	0	0	0	0	0	0	13	0	9
D_0__Eukaryota;D_1__Archaeplastida;D_2__Chloroplastida;D_3__Chlorophyta;D_4__Mamiellophyceae;D_5__Dolichomastix;D_6__Dolichomastix tenuilepis	Chlorophyta	A	Schneider et al. (2020)	0	42	0	0	4	0	3	0		9	0	0	0	0	0	0	0	0	0	0	0	4	0	0
D_0__Eukaryota;D_1__Archaeplastida;D_2__Chloroplastida;D_3__Chlorophyta;D_4__Prasinophytae;D_5__shizugawa;Ambiguous_taxa	Chlorophyta	A	Schneider et al. (2020)	0	0	0	0	0	0	0	0		23	7	0	0	0	0	0	8	0	8	0	0	4	0	0
D_0__Eukaryota;D_1__Archaeplastida;D_2__Chloroplastida;D_3__Chlorophyta;D_4__Prasinophytae;D_5__uncultured phytoplankton;D_6__uncultured phytoplankton	Chlorophyta	A	Schneider et al. (2020)	0	0	0	0	0	0	0	0		0	0	0	0	0	0	0	0	0	0	0	0	0	0	12
D_0__Eukaryota;D_1__Archaeplastida;D_2__Chloroplastida;D_3__Chlorophyta;D_4__Prasinophytae;__;__	Chlorophyta	A	Schneider et al. (2020)	0	0	0	0	0	0	0	0		0	0	0	0	0	3	0	0	0	0	0	0	0	0	0
D_0__Eukaryota;D_1__Archaeplastida;D_2__Chloroplastida;D_3__Chlorophyta;D_4__Trebouxiophyceae;D_5__uncultured Nannochloris;D_6__uncultured Nannochloris	Chlorophyta	A	Schneider et al. (2020)	0	14	28	0	4	0	0	41		0	4	0	0	0	34	0	7	20	0	8	0	0	0	11691
D_0__Eukaryota;D_1__Archaeplastida;D_2__Chloroplastida;D_3__Chlorophyta;D_4__Ulvophyceae;D_5__Ulva pertusa;D_6__Ulva pertusa	Chlorophyta	A	Schneider et al. (2020)	0	4	0	0	8	49	0	0		0	0	0	0	0	0	0	0	0	0	5	0	0	0	0
D_0__Eukaryota;D_1__Archaeplastida;D_2__Chloroplastida;D_3__Chlorophyta;D_5__Chlorodendrales;D_6__Tetraselmis;Ambiguous_taxa	Chlorophyta	A	Schneider et al. (2020)	0	10	32	25	17	13	13	9		41	14	3	12	8	34	8	17	1123	6	20	0	96	111	2987
D_0__Eukaryota;D_1__Archaeplastida;D_2__Chloroplastida;D_3__Chlorophyta;D_5__Dolichomastigales;D_6__Crustomastix;Ambiguous_taxa	Chlorophyta	A	Schneider et al. (2020)	0	54	0	0	9	0	0	0		0	0	0	0	0	0	0	0	0	0	0	0	3	0	0
D_0__Eukaryota;D_1__Archaeplastida;D_2__Chloroplastida;D_3__Chlorophyta;D_5__Dolichomastigales;D_6__Crustomastix;__	Chlorophyta	A	Schneider et al. (2020)	0	0	0	0	0	0	0	0		7	0	0	0	0	0	0	0	0	0	0	0	0	0	0
D_0__Eukaryota;D_1__Archaeplastida;D_2__Chloroplastida;D_3__Chlorophyta;D_5__Mamiellales;D_6__Bathycoccus;__	Chlorophyta	A	Schneider et al. (2020)	166	3307	903	508	3096	20	706	110		5557	25	169	0	0	29	24	31	117	129	62	20	96	928	115
D_0__Eukaryota;D_1__Archaeplastida;D_2__Chloroplastida;D_3__Chlorophyta;D_5__Mamiellales;D_6__Mamiella;Ambiguous_taxa	Chlorophyta	A	Schneider et al. (2020)	0	0	5	0	8	0	0	5		11	0	0	0	0	0	0	0	0	0	0	0	4	0	0
D_0__Eukaryota;D_1__Archaeplastida;D_2__Chloroplastida;D_3__Chlorophyta;D_5__Mamiellales;D_6__Mamiella;D_7__Prasinophyceae sp. RCC391	Chlorophyta	A	Schneider et al. (2020)	0	38	9	0	0	0	0	0		0	0	0	0	0	0	0	0	0	0	0	0	57	0	0
D_0__Eukaryota;D_1__Archaeplastida;D_2__Chloroplastida;D_3__Chlorophyta;D_5__Mamiellales;D_6__Micromonas;Ambiguous_taxa	Chlorophyta	A	Schneider et al. (2020)	78	1873	675	244	1535	14	439	88		2271	29	63	0	0	0	0	49	193	7	27	0	726	674	1005
D_0__Eukaryota;D_1__Archaeplastida;D_2__Chloroplastida;D_3__Chlorophyta;D_5__Mamiellales;D_6__Micromonas;D_7__Micromonas pusilla	Chlorophyta	A	Schneider et al. (2020)	0	10	0	0	0	0	0	0		95	0	0	0	0	30	0	0	354	0	0	0	487	62	166
D_0__Eukaryota;D_1__Archaeplastida;D_2__Chloroplastida;D_3__Chlorophyta;D_5__Mamiellales;D_6__Micromonas;__	Chlorophyta	A	Schneider et al. (2020)	0	144	35	10	126	0	30	0		65	0	0	0	0	8	0	0	0	0	0	0	0	26	144
D_0__Eukaryota;D_1__Archaeplastida;D_2__Chloroplastida;D_3__Chlorophyta;D_5__Mamiellales;D_6__Ostreococcus;D_7__uncultured Chlorophyta	Chlorophyta	A	Schneider et al. (2020)	0	0	157	0	883	0	46	0		314	0	14	0	5	10	0	40	26	39	30	7	119	96	16
D_0__Eukaryota;D_1__Archaeplastida;D_2__Chloroplastida;D_3__Chlorophyta;D_5__Mamiellales;D_6__Ostreococcus;D_7__uncultured Ostreococcus	Chlorophyta	A	Schneider et al. (2020)	1060	21735	4960	2998	8402	83	4529	1532		15858	266	611	18	93	164	151	575	1134	415	819	65	3460	3465	909
D_0__Eukaryota;D_1__Archaeplastida;D_2__Chloroplastida;D_3__Chlorophyta;D_5__Mamiellales;D_6__Ostreococcus;__	Chlorophyta	A	Schneider et al. (2020)	0	0	0	0	0	0	0	0		0	0	0	0	0	0	0	2	0	0	0	0	0	0	27
D_0__Eukaryota;D_1__Archaeplastida;D_2__Chloroplastida;D_3__Chlorophyta;D_5__Mamiellales;__;__	Chlorophyta	A	Schneider et al. (2020)	0	0	0	0	0	0	0	0		0	0	0	0	0	8	0	0	0	0	0	0	0	0	0
D_0__Eukaryota;D_1__Archaeplastida;D_2__Chloroplastida;D_3__Chlorophyta;D_5__Nephroselmidales;D_6__Nephroselmis;Ambiguous_taxa	Chlorophyta	A	Schneider et al. (2020)	3	2	0	3	0	0	0	0		0	0	0	0	0	0	0	11	17	0	6	0	8	0	0
D_0__Eukaryota;D_1__Archaeplastida;D_2__Chloroplastida;D_3__Chlorophyta;D_5__Pseudoscourfieldiales;D_6__Prasinoderma;Ambiguous_taxa	Chlorophyta	A	Schneider et al. (2020)	10	391	33	32	152	0	27	0		344	0	9	0	0	0	0	11	14	8	0	9	83	45	28
D_0__Eukaryota;D_1__Archaeplastida;D_2__Chloroplastida;D_3__Chlorophyta;D_5__Pseudoscourfieldiales;D_6__Prasinoderma;D_7__Prasinoderma singulare	Chlorophyta	A	Schneider et al. (2020)	0	3	35	12	27	0	36	0		28	11	22	5	0	7	0	0	0	9	7	0	7	8	7
D_0__Eukaryota;D_1__Archaeplastida;D_2__Chloroplastida;D_3__Chlorophyta;D_5__Pseudoscourfieldiales;D_6__Prasinoderma;D_7__Prasinophyceae sp. MBIC10622	Chlorophyta	A	Schneider et al. (2020)	0	0	0	0	0	0	0	0		0	0	16	0	0	0	0	0	0	0	0	0	0	0	0
D_0__Eukaryota;D_1__Archaeplastida;D_2__Chloroplastida;D_3__Chlorophyta;D_5__Pseudoscourfieldiales;D_6__Prasinoderma;__	Chlorophyta	A	Schneider et al. (2020)	0	12	7	0	3	0	0	0		12	0	0	0	0	0	0	0	0	0	0	0	0	0	0
D_0__Eukaryota;D_1__Archaeplastida;D_2__Chloroplastida;D_3__Chlorophyta;D_5__Pyramimonadales;Ambiguous_taxa;Ambiguous_taxa	Chlorophyta	A	Schneider et al. (2020)	0	0	0	0	0	0	0	0		0	0	0	0	0	0	0	0	0	0	0	0	0	0	27
D_0__Eukaryota;D_1__Archaeplastida;D_2__Chloroplastida;D_3__Chlorophyta;D_5__Pyramimonadales;D_6__Cymbomonas;D_7__Cymbomonas tetramitiformis	Chlorophyta	A	Schneider et al. (2020)	0	0	0	0	0	0	0	0		0	3	0	0	0	0	0	0	0	0	0	0	0	0	0
D_0__Eukaryota;D_1__Archaeplastida;D_2__Chloroplastida;D_3__Chlorophyta;D_5__Ulvales;D_6__Ulvella;D_7__Acrochaete sp. KAS830	Chlorophyta	A	Schneider et al. (2020)	0	0	4	0	0	7	0	0		0	0	0	0	0	0	0	0	0	0	0	0	0	0	0
D_0__Eukaryota;D_1__Archaeplastida;D_2__Chloroplastida;D_3__Chlorophyta;__;__;__	Chlorophyta	A	Schneider et al. (2020)	0	248	29	9	43	0	9	0		13	14	21	8	0	4	0	8	9	0	0	0	0	2	0
D_0__Eukaryota;D_1__Archaeplastida;D_2__Chloroplastida;__;__;__;__	Chlorophyta	A	Schneider et al. (2020)	0	0	0	0	3	0	0	0		0	2	0	0	0	0	0	8	0	0	0	0	0	0	0
D_0__Eukaryota;D_1__Centrohelida;Ambiguous_taxa;Ambiguous_taxa;Ambiguous_taxa;Ambiguous_taxa;Ambiguous_taxa	Others	H	Mikrjukov et al. (2000)	0	0	0	0	0	0	0	0		0	8	14	0	0	0	0	8	0	0	0	0	0	0	0
D_0__Eukaryota;D_1__Centrohelida;D_2__Acanthocystidae;D_3__Pterocystis;__;__;__	Others	H	Mikrjukov et al. (2000)	0	0	0	0	5	0	0	0		0	0	0	0	0	0	0	0	0	0	0	0	0	0	0
D_0__Eukaryota;D_1__Centrohelida;D_2__uncultured marine eukaryote;D_3__uncultured marine eukaryote;D_4__uncultured marine eukaryote;D_5__uncultured marine eukaryote;D_6__uncultured marine eukaryote	Others	H	Mikrjukov et al. (2000)	0	0	26	0	20	0	6	0		27	10	3	0	4	3	0	12	0	8	0	0	5	10	8
D_0__Eukaryota;D_1__Cryptophyceae;D_2__Cryptomonadales;Ambiguous_taxa;Ambiguous_taxa;Ambiguous_taxa;Ambiguous_taxa	Others	A	Schneider et al. (2020)	9	96	0	5	11	3	0	0		70	0	0	0	0	0	0	0	0	0	0	0	0	10	0
D_0__Eukaryota;D_1__Cryptophyceae;D_2__Cryptomonadales;D_3__Geminigera;D_4__Geminigera cryophila;D_5__Geminigera cryophila;D_6__Geminigera cryophila	Others	M	Schneider et al. (2020)	50	1887	316	68	634	26	81	44		2126	25	31	0	0	11	0	29	143	39	29	0	914	565	50
D_0__Eukaryota;D_1__Cryptophyceae;D_2__Cryptomonadales;D_3__Hemiselmis;D_4__uncultured marine eukaryote;D_5__uncultured marine eukaryote;D_6__uncultured marine eukaryote	Others	A	Schneider et al. (2020)	0	0	0	0	0	0	0	0		8	0	0	0	0	0	0	0	0	0	0	0	0	0	0
D_0__Eukaryota;D_1__Cryptophyceae;D_2__Cryptomonadales;D_3__Proteomonas;Ambiguous_taxa;Ambiguous_taxa;Ambiguous_taxa	Others	A	Schneider et al. (2020)	0	0	0	0	0	0	0	0		0	0	0	0	0	0	0	0	8	0	0	0	0	0	0
D_0__Eukaryota;D_1__Cryptophyceae;D_2__Cryptomonadales;D_3__Teleaulax;Ambiguous_taxa;Ambiguous_taxa;Ambiguous_taxa	Others	A	Schneider et al. (2020)	5	80	23	10	51	0	6	10		107	0	6	0	0	0	0	4	29	0	5	0	26	51	0
D_0__Eukaryota;D_1__Cryptophyceae;D_2__Cryptomonadales;D_3__uncultured eukaryote;D_4__uncultured eukaryote;D_5__uncultured eukaryote;D_6__uncultured eukaryote	Others	A	Schneider et al. (2020)	16	118	39	40	134	10	10	0		355	0	11	0	0	0	0	5	33	5	0	0	137	117	11
D_0__Eukaryota;D_1__Cryptophyceae;D_2__Cryptomonadales;__;__;__;__	Others	A	Schneider et al. (2020)	14	649	272	17	491	0	35	33		1223	28	34	0	5	7	16	26	153	0	19	0	533	365	308
D_0__Eukaryota;D_1__Cryptophyceae;D_2__Kathablepharidae;D_3__Leucocryptos;Ambiguous_taxa;Ambiguous_taxa;Ambiguous_taxa	Others	H	Vørs (1992)	106	5090	353	90	250	59	139	63		1303	46	48	36	11	36	10	123	54	78	33	0	86	172	44
D_0__Eukaryota;D_1__Cryptophyceae;D_2__Kathablepharidae;D_3__Leucocryptos;D_4__uncultured eukaryote;D_5__uncultured eukaryote;D_6__uncultured eukaryote	Others	H	Vørs (1992)	0	145	19	3	29	0	13	9		280	42	60	44	14	55	25	80	69	28	23	7	35	86	0
D_0__Eukaryota;D_1__Cryptophyceae;D_2__Kathablepharidae;D_3__uncultured;Ambiguous_taxa;Ambiguous_taxa;Ambiguous_taxa	Others	H	Vørs (1992)	0	39	5	0	0	0	0	0		7	5	0	0	0	0	0	0	0	0	0	0	0	0	0
D_0__Eukaryota;D_1__Cryptophyceae;D_2__uncultured;D_3__uncultured eukaryote;D_4__uncultured eukaryote;D_5__uncultured eukaryote;D_6__uncultured eukaryote	Others	u		0	0	0	0	7	0	0	0		19	0	0	5	0	0	0	0	0	4	0	0	0	9	0
D_0__Eukaryota;D_1__Excavata;D_2__Discoba;D_3__Jakobida;D_4__Kofoidinium sp. FG256;D_5__Kofoidinium sp. FG256;D_6__Kofoidinium sp. FG256	Others	H	Richardson et al. (2019)	0	0	0	0	0	0	3	0		0	0	0	0	0	0	0	7	0	0	0	0	0	0	0
D_0__Eukaryota;D_1__Excavata;D_2__Discoba;D_3__Jakobida;D_4__uncultured dinoflagellate;D_5__uncultured dinoflagellate;D_6__uncultured dinoflagellate	Others	H	Richardson et al. (2019)	0	3	0	0	0	0	0	5		0	0	0	0	0	0	0	0	0	0	0	0	0	0	0
D_0__Eukaryota;D_1__Excavata;D_2__Discoba;D_3__Jakobida;D_4__uncultured;D_5__uncultured eukaryote;D_6__uncultured eukaryote	Others	H	Richardson et al. (2019)	0	0	202	23	352	0	227	0		189	0	20	6	11	6	2	2	17	28	24	0	8	109	0
D_0__Eukaryota;D_1__Haptophyta;Ambiguous_taxa;Ambiguous_taxa;Ambiguous_taxa;Ambiguous_taxa;Ambiguous_taxa	Others	u		0	0	31	2	41	0	50	0		53	54	111	22	5	12	5	37	22	32	5	0	31	25	0
D_0__Eukaryota;D_1__Haptophyta;D_2__Pav3;Ambiguous_taxa;Ambiguous_taxa;Ambiguous_taxa;Ambiguous_taxa	Others	u		0	5	0	0	0	0	0	0		0	8	0	0	0	3	0	7	0	2	0	0	0	3	0
D_0__Eukaryota;D_1__Haptophyta;D_2__Pavlovophyceae;D_3__AA5F1;D_4__uncultured eukaryote;D_5__uncultured eukaryote;D_6__uncultured eukaryote	Others	u		0	3	10	0	23	0	7	0		41	5	0	0	0	0	0	0	0	5	0	0	0	11	0
D_0__Eukaryota;D_1__Haptophyta;D_2__Prymnesiophyceae;Ambiguous_taxa;Ambiguous_taxa;Ambiguous_taxa;Ambiguous_taxa	Others	u		15	78	90	0	75	0	74	0		190	43	69	25	11	27	0	59	62	58	54	0	73	60	0
D_0__Eukaryota;D_1__Haptophyta;D_2__Prymnesiophyceae;D_3__Coccolithales;Ambiguous_taxa;Ambiguous_taxa;Ambiguous_taxa	Others	u		0	0	0	3	0	0	0	0		16	0	0	0	0	0	0	0	4	0	0	0	0	0	7
D_0__Eukaryota;D_1__Haptophyta;D_2__Prymnesiophyceae;D_3__Isochrysidales;Ambiguous_taxa;Ambiguous_taxa;Ambiguous_taxa	Others	u		0	22	68	59	159	0	225	0		86	0	24	27	15	28	16	17	24	29	0	11	21	21	20
D_0__Eukaryota;D_1__Haptophyta;D_2__Prymnesiophyceae;D_3__Phaeocystis;Ambiguous_taxa;Ambiguous_taxa;Ambiguous_taxa	Others	M	Burkholder et al. (2008)	17	142	327	32	332	12	279	38		718	185	102	103	8	161	37	410	299	111	92	24	323	255	64
D_0__Eukaryota;D_1__Haptophyta;D_2__Prymnesiophyceae;D_3__Phaeocystis;__;__;__	Others	M	Burkholder et al. (2008)	0	0	0	0	0	0	0	0		0	0	0	0	0	0	0	0	0	0	0	0	0	0	0
D_0__Eukaryota;D_1__Haptophyta;D_2__Prymnesiophyceae;D_3__Prymnesiales;Ambiguous_taxa;Ambiguous_taxa;Ambiguous_taxa	Others	M	Schneider et al. (2020)	0	79	126	42	200	21	36	0		271	59	83	82	26	62	32	91	107	94	0	0	152	91	25
D_0__Eukaryota;D_1__Haptophyta;D_2__Prymnesiophyceae;D_3__Prymnesiales;D_4__AI5F14RJ2A07;D_5__uncultured eukaryote;D_6__uncultured eukaryote	Others	M	Schneider et al. (2020)	0	0	0	0	0	0	0	0		0	0	0	0	0	0	0	0	18	0	0	0	0	0	16
D_0__Eukaryota;D_1__Haptophyta;D_2__Prymnesiophyceae;D_3__Prymnesiales;D_4__Chrysocampanula;Ambiguous_taxa;Ambiguous_taxa	Others	M	Schneider et al. (2020)	0	0	11	0	0	0	0	0		0	5	0	0	0	0	0	0	0	0	0	0	0	0	0
D_0__Eukaryota;D_1__Haptophyta;D_2__Prymnesiophyceae;D_3__Prymnesiales;D_4__Chrysochromulina;Ambiguous_taxa;Ambiguous_taxa	Others	M	Schneider et al. (2020)	0	260	97	9	134	0	96	11		256	61	11	27	12	38	0	87	59	46	46	0	118	69	0
D_0__Eukaryota;D_1__Haptophyta;D_2__Prymnesiophyceae;D_3__Prymnesiales;D_4__Chrysochromulina;D_5__Chrysochromulina leadbeateri;D_6__Chrysochromulina leadbeateri	Others	M	Schneider et al. (2020)	0	36	0	0	9	0	0	0		89	0	0	0	4	0	0	0	0	0	0	0	0	0	0
D_0__Eukaryota;D_1__Haptophyta;D_2__Prymnesiophyceae;D_3__Prymnesiales;D_4__Chrysochromulina;D_5__uncultured eukaryote;D_6__uncultured eukaryote	Others	M	Schneider et al. (2020)	0	33	0	0	20	0	0	0		26	0	7	0	0	0	0	18	10	0	0	0	0	0	0
D_0__Eukaryota;D_1__Haptophyta;D_2__Prymnesiophyceae;D_3__Prymnesiales;D_4__Chrysochromulina;__;__	Others	M	Schneider et al. (2020)	0	0	16	0	9	0	41	0		0	0	0	0	0	0	0	13	0	0	0	0	11	0	0
D_0__Eukaryota;D_1__Haptophyta;D_2__Prymnesiophyceae;D_3__Prymnesiales;D_4__Chrysoculter;Ambiguous_taxa;Ambiguous_taxa	Others	M	Schneider et al. (2020)	0	76	4	5	0	0	0	0		4	0	0	0	0	0	0	0	0	0	0	0	0	0	5
D_0__Eukaryota;D_1__Haptophyta;D_2__Prymnesiophyceae;D_3__Prymnesiales;D_4__OLI16029;D_5__uncultured eukaryote;D_6__uncultured eukaryote	Others	M	Schneider et al. (2020)	0	0	33	0	32	0	23	0		50	13	31	0	0	40	0	56	58	35	0	21	132	33	35
D_0__Eukaryota;D_1__Haptophyta;D_2__Prymnesiophyceae;D_3__Prymnesiales;D_4__OLI51059;Ambiguous_taxa;Ambiguous_taxa	Others	M	Schneider et al. (2020)	0	7	6	0	65	0	9	0		0	0	11	0	0	0	0	0	0	0	0	0	0	0	0
D_0__Eukaryota;D_1__Haptophyta;D_2__Prymnesiophyceae;D_3__Prymnesiales;D_4__OLI51059;D_5__uncultured eukaryote;D_6__uncultured eukaryote	Others	M	Schneider et al. (2020)	0	20	13	0	8	0	19	0		62	4	0	0	0	0	0	13	0	0	0	0	9	23	4
D_0__Eukaryota;D_1__Haptophyta;D_2__Prymnesiophyceae;D_3__Prymnesiales;D_4__Prymnesium;Ambiguous_taxa;Ambiguous_taxa	Others	M	Burkholder et al. (2008)	0	25	45	0	0	0	23	4		82	0	0	18	0	0	0	43	22	31	0	0	127	17	33
D_0__Eukaryota;D_1__Haptophyta;D_2__Prymnesiophyceae;D_3__Prymnesiales;D_4__Prymnesium;__;__	Others	M	Burkholder et al. (2008)	0	0	0	0	0	0	0	0		0	0	0	0	0	0	0	0	0	0	0	0	0	4	0
D_0__Eukaryota;D_1__Haptophyta;D_2__Prymnesiophyceae;D_3__Prymnesiales;D_4__eukaryote clone OLI11056;D_5__eukaryote clone OLI11056;D_6__eukaryote clone OLI11056	Others	u		0	0	0	0	0	0	0	0		0	0	0	0	0	0	2	0	0	6	0	0	0	0	0
D_0__Eukaryota;D_1__Haptophyta;D_2__Prymnesiophyceae;D_3__Prymnesiales;__;__;__	Others	u		13	93	0	4	80	0	83	34		203	27	13	17	0	103	6	117	105	5	76	0	194	38	38
D_0__Eukaryota;D_1__Haptophyta;D_2__Prymnesiophyceae;D_3__SGUH624;D_4__uncultured eukaryote;D_5__uncultured eukaryote;D_6__uncultured eukaryote	Others	u		0	0	0	0	0	0	0	0		0	0	0	0	0	17	0	0	0	0	0	0	0	0	0
D_0__Eukaryota;D_1__Haptophyta;D_2__Prymnesiophyceae;D_3__uncultured;Ambiguous_taxa;Ambiguous_taxa;Ambiguous_taxa	Others	u		0	0	42	0	176	0	89	0		627	107	159	32	10	117	41	215	154	54	66	22	198	107	0
D_0__Eukaryota;D_1__Haptophyta;D_2__Prymnesiophyceae;__;__;__;__	Others	u		20	348	228	0	120	0	59	16		279	63	15	36	0	49	0	59	59	45	0	0	111	92	28
D_0__Eukaryota;D_1__Haptophyta;D_2__T58;D_3__uncultured marine haptophyte;D_4__uncultured marine haptophyte;D_5__uncultured marine haptophyte;D_6__uncultured marine haptophyte	Others	u		0	0	4	0	0	0	0	0		0	0	0	0	0	0	0	0	0	0	0	0	0	0	0
D_0__Eukaryota;D_1__Incertae Sedis;D_2__Ancyromonadida;D_3__Ancyromonas;D_4__Ancyromonas indica;D_5__Ancyromonas indica;D_6__Ancyromonas indica	Others	H	Atkins et al. (2000)	0	0	0	0	0	0	0	0		0	0	0	0	0	2	0	0	0	0	0	0	0	0	0
D_0__Eukaryota;D_1__Incertae Sedis;D_2__Ancyromonadida;D_3__Ancyromonas;__;__;__	Others	H	Atkins et al. (2000)	0	0	0	0	0	0	0	0		0	0	0	0	0	0	0	0	0	4	0	0	0	0	0
D_0__Eukaryota;D_1__Incertae Sedis;D_2__Apusomonadidae;D_3__Amastigomonas;Ambiguous_taxa;Ambiguous_taxa;Ambiguous_taxa	Others	H	Lee et al. (2006)	0	0	0	0	0	0	0	0		0	0	4	0	4	0	0	0	0	2	0	0	4	0	0
D_0__Eukaryota;D_1__Incertae Sedis;D_2__Mantamonas;D_3__Mantamonas plastica;D_4__Mantamonas plastica;D_5__Mantamonas plastica;D_6__Mantamonas plastica	Others	H	Glücksman et al. (2011)	0	0	0	0	0	0	0	0		0	0	0	0	0	0	0	0	0	0	0	0	0	0	0
D_0__Eukaryota;D_1__Incertae Sedis;D_2__Mantamonas;D_3__uncultured eukaryote;D_4__uncultured eukaryote;D_5__uncultured eukaryote;D_6__uncultured eukaryote	Others	H	Glücksman et al. (2011)	0	33	9	0	0	0	0	15		0	0	0	0	0	0	0	0	0	0	0	0	0	0	9
D_0__Eukaryota;D_1__Incertae Sedis;D_2__Palpitomonas;D_3__uncultured eukaryote;D_4__uncultured eukaryote;D_5__uncultured eukaryote;D_6__uncultured eukaryote	Others	H	Yabuki et al. (2010)	0	0	0	0	0	0	0	0		0	0	0	0	0	0	0	0	0	0	0	0	0	0	8
D_0__Eukaryota;D_1__Incertae Sedis;D_2__Palpitomonas;__;__;__;__	Others	H	Yabuki et al. (2010)	0	0	0	0	0	0	5	0		0	0	0	0	0	0	0	0	0	0	0	0	0	0	0
D_0__Eukaryota;D_1__Incertae Sedis;D_2__Telonema;Ambiguous_taxa;Ambiguous_taxa;Ambiguous_taxa;Ambiguous_taxa	Others	H	Schneider et al. (2020)	0	169	83	0	202	0	117	0		328	28	26	0	0	11	0	0	23	6	0	8	113	132	51
D_0__Eukaryota;D_1__Incertae Sedis;D_2__Telonema;D_3__uncultured Telonema;D_4__uncultured Telonema;D_5__uncultured Telonema;D_6__uncultured Telonema	Others	H	Schneider et al. (2020)	0	11	7	0	7	0	0	0		82	11	20	11	0	3	0	0	12	0	15	0	15	31	6
D_0__Eukaryota;D_1__Incertae Sedis;D_2__Telonema;D_3__uncultured Telonemida;D_4__uncultured Telonemida;D_5__uncultured Telonemida;D_6__uncultured Telonemida	Others	H	Schneider et al. (2020)	0	26	20	0	17	0	21	12		171	21	19	8	0	0	0	0	5	23	0	0	11	49	0
D_0__Eukaryota;D_1__Incertae Sedis;D_2__Telonema;D_3__uncultured eukaryote;D_4__uncultured eukaryote;D_5__uncultured eukaryote;D_6__uncultured eukaryote	Others	H	Schneider et al. (2020)	0	97	111	14	142	10	128	14		502	52	53	88	9	49	16	37	84	85	37	7	135	204	85
D_0__Eukaryota;D_1__Incertae Sedis;D_2__Telonema;D_3__uncultured syndiniales;D_4__uncultured syndiniales;D_5__uncultured syndiniales;D_6__uncultured syndiniales	Others	H	Schneider et al. (2020)	0	0	30	4	62	0	8	0		20	0	0	0	0	10	0	0	0	0	0	0	0	0	0
D_0__Eukaryota;D_1__Incertae Sedis;D_2__Telonema;__;__;__;__	Others	H	Schneider et al. (2020)	0	39	93	0	107	0	53	0		35	9	30	38	0	2	0	4	24	32	0	0	23	15	5
D_0__Eukaryota;D_1__Opisthokonta;D_2__Holozoa;D_3__Choanoflagellida;D_4__Acanthoecida;D_5__Acanthoecidae;Ambiguous_taxa	Others	H	Lee et al. (2006)	0	18	0	6	0	0	4	0		0	0	0	0	0	0	0	0	0	0	0	0	0	0	0
D_0__Eukaryota;D_1__Opisthokonta;D_2__Holozoa;D_3__Choanoflagellida;D_4__Acanthoecida;D_5__Stephanoecidae;D_6__uncultured eukaryote	Others	H	Lee et al. (2006)	4	22	30	3	6	0	0	0		49	0	0	0	0	2	0	0	0	0	0	0	0	9	54
D_0__Eukaryota;D_1__Opisthokonta;D_2__Holozoa;D_3__Choanoflagellida;D_4__Acanthoecida;D_5__uncultured choanoflagellate;D_6__uncultured choanoflagellate	Others	H	Lee et al. (2006)	0	0	0	0	15	0	3	0		0	7	0	0	0	0	0	0	0	0	0	0	0	0	0
D_0__Eukaryota;D_1__Opisthokonta;D_2__Holozoa;D_3__Choanoflagellida;D_4__Craspedida;D_5__uncultured;D_6__uncultured eukaryote	Others	H	Lee et al. (2006)	0	0	3	0	40	0	0	0		45	3	0	0	0	5	0	0	0	0	0	0	0	0	18
D_0__Eukaryota;D_1__Opisthokonta;D_2__Holozoa;D_3__Choanoflagellida;D_5__Acanthoecidae;D_6__Pleurasiga;D_7__Pleurasiga minima	Others	H	Lee et al. (2006)	0	0	5	0	0	0	0	12		0	0	0	0	0	0	0	0	0	0	0	0	0	0	0
D_0__Eukaryota;D_1__Opisthokonta;D_2__Holozoa;D_3__Choanoflagellida;D_5__Acanthoecidae;D_6__Pleurasiga;D_7__uncultured eukaryote	Others	H	Lee et al. (2006)	6	13	9	0	13	0	0	6		46	6	0	0	0	0	0	0	0	0	4	0	0	4	0
D_0__Eukaryota;D_1__Opisthokonta;D_2__Holozoa;D_3__Choanoflagellida;D_5__Codonosigidae;D_6__Monosiga;D_7__uncultured marine eukaryote	Others	H	Lee et al. (2006)	0	24	0	0	0	0	0	0		49	0	0	3	0	0	0	0	0	4	0	0	0	0	28
D_0__Eukaryota;D_1__Opisthokonta;D_2__Holozoa;D_3__Choanoflagellida;D_5__Codosigidae;D_6__Lagenoeca;D_7__uncultured eukaryote	Others	H	Lee et al. (2006)	0	209	13	55	9	13	0	0		14	0	0	0	0	0	0	0	8	0	0	0	0	0	10
D_0__Eukaryota;D_1__Opisthokonta;D_2__Holozoa;D_3__Choanoflagellida;D_5__Stephanoecidae;D_6__Bicosta;Ambiguous_taxa	Others	H	Lee et al. (2006)	13	126	52	4	27	0	22	9		129	0	0	0	0	11	3	0	16	0	0	0	4	17	31
D_0__Eukaryota;D_1__Opisthokonta;D_2__Holozoa;D_3__Choanoflagellida;D_5__Stephanoecidae;D_6__Calliacantha;Ambiguous_taxa	Others	H	Lee et al. (2006)	0	29	0	0	15	0	0	0		6	0	0	0	0	0	0	0	0	0	0	0	0	0	0
D_0__Eukaryota;D_1__Opisthokonta;D_2__Holozoa;D_3__Choanoflagellida;D_5__Stephanoecidae;D_6__Diaphanoeca;D_7__uncultured eukaryote	Others	H	Lee et al. (2006)	0	13	21	4	0	0	0	0		28	5	0	0	0	0	0	0	0	0	0	0	0	2	0
D_0__Eukaryota;D_1__Opisthokonta;D_2__Holozoa;D_3__Choanoflagellida;D_5__Stephanoecidae;D_6__Marine Choanoflagellates 1;Ambiguous_taxa	Others	H	Lee et al. (2006)	10	44	34	9	31	0	12	0		12	0	0	0	0	10	0	7	0	0	0	0	0	8	119
D_0__Eukaryota;D_1__Opisthokonta;D_2__Holozoa;D_3__Choanoflagellida;D_5__Stephanoecidae;D_6__Marine Choanoflagellates 1;D_7__uncultured eukaryote	Others	H	Lee et al. (2006)	0	9	15	0	0	0	0	0		22	0	0	0	0	7	0	0	0	0	0	0	0	3	0
D_0__Eukaryota;D_1__Opisthokonta;D_2__Holozoa;D_3__Choanoflagellida;D_5__Stephanoecidae;D_6__Stephanoeca;D_7__uncultured eukaryote	Others	H	Lee et al. (2006)	0	0	3	3	0	0	0	0		0	0	3	0	0	0	0	0	0	0	0	0	0	0	0
D_0__Eukaryota;D_1__Opisthokonta;D_2__Holozoa;D_3__Choanoflagellida;D_5__Stephanoecidae;D_6__Stephanoeca;__	Others	H	Lee et al. (2006)	0	5	3	0	0	0	0	0		0	0	0	0	0	0	0	0	0	0	0	0	0	0	0
D_0__Eukaryota;D_1__Opisthokonta;D_2__Holozoa;D_3__Choanoflagellida;D_5__Stephanoecidae;__;__	Others	H	Lee et al. (2006)	0	0	8	0	3	0	0	0		25	0	0	0	3	0	0	0	0	0	0	0	0	4	5
D_0__Eukaryota;D_1__Opisthokonta;D_2__Holozoa;D_3__Choanoflagellida;__;__;__	Others	H	Lee et al. (2006)	24	237	62	30	36	0	8	11		85	5	0	0	0	4	0	0	4	3	0	0	0	13	12
D_0__Eukaryota;D_1__Opisthokonta;D_2__Holozoa;D_3__Filasterea;D_5__Capsasporidae;D_6__Marine Group;Ambiguous_taxa	Others	H	Leger and Ruiz-Trillo (2021)	0	33	7	3	4	0	3	0		0	5	0	4	12	6	0	0	0	0	0	0	0	3	0
D_0__Eukaryota;D_1__Opisthokonta;D_2__Holozoa;D_3__Ichthyosporea;D_4__Ichthyophonae;D_5__Pseudoperkinsidae;D_6__uncultured eukaryote	Others	H	Leger and Ruiz-Trillo (2021)	0	0	0	0	0	0	0	0		0	0	0	0	0	0	0	0	0	0	2	0	0	0	0
D_0__Eukaryota;D_1__Opisthokonta;D_2__Holozoa;D_3__Ichthyosporea;D_5__Abeoformidae;D_6__Marine Ichthyosporeans 1;D_7__uncultured eukaryote	Others	H	Leger and Ruiz-Trillo (2021)	47	864	73	117	7	28	14	34		0	8	59	5	0	3	0	3	11	3	4	0	0	0	11
D_0__Eukaryota;D_1__Opisthokonta;D_2__Holozoa;D_3__Ichthyosporea;D_5__Abeoformidae;D_6__Pirum;Ambiguous_taxa	Others	H	Leger and Ruiz-Trillo (2021)	5	20	70	19	10	0	22	69		0	12	95	21	0	18	35	7	8	12	10	0	0	0	26
D_0__Eukaryota;D_1__Opisthokonta;D_2__Holozoa;D_3__Ichthyosporea;D_5__Abeoformidae;D_6__Pirum;D_7__uncultured eukaryote	Others	H	Leger and Ruiz-Trillo (2021)	0	0	6	0	0	0	0	0		5	0	0	0	0	0	0	0	0	0	0	0	0	0	0
D_0__Eukaryota;D_1__Opisthokonta;D_2__Holozoa;D_3__Ichthyosporea;D_5__Abeoformidae;D_6__Pirum;__	Others	H	Leger and Ruiz-Trillo (2021)	0	0	0	0	0	0	0	0		0	0	11	0	10	9	0	0	0	0	0	0	0	0	0
D_0__Eukaryota;D_1__Opisthokonta;D_2__Holozoa;D_3__Ichthyosporea;D_5__Pseudoperkinsidae;D_6__Pseudoperkinsus;Ambiguous_taxa	Others	H	Leger and Ruiz-Trillo (2021)	0	0	7	0	0	0	0	0		5	0	5	0	0	0	0	0	0	0	0	0	0	0	0
D_0__Eukaryota;D_1__Picozoa;Ambiguous_taxa;Ambiguous_taxa;Ambiguous_taxa;Ambiguous_taxa;Ambiguous_taxa	Others	H	Obiol et al. (2021)	0	12	10	0	6	0	7	0		5	9	0	0	0	11	2	16	0	0	5	0	8	0	0
D_0__Eukaryota;D_1__Picozoa;D_2__Picomonadida;Ambiguous_taxa;Ambiguous_taxa;Ambiguous_taxa;Ambiguous_taxa	Others	H	Obiol et al. (2021)	0	20	24	0	35	0	23	6		48	17	0	6	0	0	5	112	115	8	20	4	76	0	0
D_0__Eukaryota;D_1__Picozoa;D_2__uncultured eukaryote;D_3__uncultured eukaryote;D_4__uncultured eukaryote;D_5__uncultured eukaryote;D_6__uncultured eukaryote	Others	H	Obiol et al. (2021)	0	0	9	0	0	0	0	0		0	0	0	4	9	7	0	0	7	8	0	0	0	0	0
D_0__Eukaryota;D_1__Picozoa;D_2__uncultured marine eukaryote;D_3__uncultured marine eukaryote;D_4__uncultured marine eukaryote;D_5__uncultured marine eukaryote;D_6__uncultured marine eukaryote	Others	H	Obiol et al. (2021)	0	0	16	0	16	0	0	27		22	7	0	0	0	0	0	0	8	0	0	0	0	0	0
D_0__Eukaryota;D_1__Picozoa;D_2__uncultured rhodophyte;D_3__uncultured rhodophyte;D_4__uncultured rhodophyte;D_5__uncultured rhodophyte;D_6__uncultured rhodophyte	Others	H	Obiol et al. (2021)	0	31	40	9	0	0	16	0		27	0	9	11	0	0	0	9	34	0	5	0	9	13	0
D_0__Eukaryota;D_1__Picozoa;__;__;__;__;__	Others	H	Obiol et al. (2021)	0	34	82	3	81	0	25	21		144	19	12	14	11	6	20	214	243	53	46	0	159	39	0
D_0__Eukaryota;D_1__SA1-3C06;D_2__Hemiarma marina;D_3__Hemiarma marina;D_4__Hemiarma marina;D_5__Hemiarma marina;D_6__Hemiarma marina	Others	H	Obiol et al. (2021)	0	10	0	0	0	0	4	0		19	0	0	0	0	0	0	0	0	0	0	0	0	3	11
D_0__Eukaryota;D_1__SAR;D_2__Alveolata;Ambiguous_taxa;Ambiguous_taxa;Ambiguous_taxa;Ambiguous_taxa	Others	u		0	129	207	0	161	20	150	0		542	249	61	261	76	263	57	565	412	96	121	0	146	195	27
D_0__Eukaryota;D_1__SAR;D_2__Alveolata;D_3__Apicomplexa;D_4__Conoidasida;D_5__Gregarinasina;D_6__uncultured marine eukaryote	Others	H	Rueckert et al. (2019)	0	0	8	0	0	0	0	0		5	545	21	20	11	0	14	23	8	16	17	0	2	30	17
D_0__Eukaryota;D_1__SAR;D_2__Alveolata;D_3__Apicomplexa;D_4__Novel Apicomplexa Class 1;Ambiguous_taxa;Ambiguous_taxa	Others	H	Rueckert et al. (2019)	0	0	0	0	50	0	0	0		0	0	0	0	0	0	0	0	45	0	4	0	0	0	0
D_0__Eukaryota;D_1__SAR;D_2__Alveolata;D_3__Apicomplexa;D_4__Novel Apicomplexa Class 1;D_5__uncultured eukaryote;D_6__uncultured eukaryote	Others	H	Rueckert et al. (2019)	0	0	0	0	22	0	0	0		0	0	0	0	0	0	0	0	0	0	0	0	0	0	0
D_0__Eukaryota;D_1__SAR;D_2__Alveolata;D_3__Apicomplexa;D_4__uncultured eukaryote;D_5__uncultured eukaryote;D_6__uncultured eukaryote	Others	H	Rueckert et al. (2019)	0	0	0	0	0	0	0	0		0	0	0	0	0	0	0	0	0	0	0	0	0	0	0
D_0__Eukaryota;D_1__SAR;D_2__Alveolata;D_3__Apicomplexa;D_6__Adeleorina;D_7__Hepatozoon;__	Others	H	Rueckert et al. (2019)	0	0	0	0	8	0	0	0		0	0	0	0	0	0	0	0	0	0	0	0	0	0	0
D_0__Eukaryota;D_1__SAR;D_2__Alveolata;D_3__Apicomplexa;D_6__Archigregarinorida;D_7__Selenidium;Ambiguous_taxa	Others	H	Rueckert et al. (2019)	0	0	143	0	0	0	0	0		0	0	0	0	0	0	0	0	0	0	0	0	0	0	0
D_0__Eukaryota;D_1__SAR;D_2__Alveolata;D_3__Apicomplexa;D_6__Archigregarinorida;D_7__Selenidium;D_8__Selenidium serpulae	Others	H	Rueckert et al. (2019)	0	0	0	0	0	29	0	0		0	0	0	0	0	0	0	0	0	0	0	0	0	0	0
D_0__Eukaryota;D_1__SAR;D_2__Alveolata;D_3__Apicomplexa;D_6__Archigregarinorida;D_7__Selenidium;__	Others	H	Rueckert et al. (2019)	0	0	0	0	0	0	0	3		0	0	0	0	0	20	0	0	0	0	2	0	2	0	0
D_0__Eukaryota;D_1__SAR;D_2__Alveolata;D_3__Apicomplexa;D_6__Eimeriorina;D_7__Goussia;D_8__Goussia ameliae	Others	H	Rueckert et al. (2019)	0	0	0	0	0	0	0	0		0	0	0	0	0	0	0	0	0	0	0	0	0	3	0
D_0__Eukaryota;D_1__SAR;D_2__Alveolata;D_3__Apicomplexa;D_6__Eimeriorina;D_7__uncultured;D_8__Apicomplexa sp. type N	Others	H	Rueckert et al. (2019)	0	0	0	0	0	0	0	0		0	0	0	0	3	0	0	0	0	0	0	0	0	0	0
D_0__Eukaryota;D_1__SAR;D_2__Alveolata;D_3__Apicomplexa;D_6__Eugregarinorida;D_7__Lankesteria;Ambiguous_taxa	Others	H	Rueckert et al. (2019)	0	0	6	0	2	0	0	0		0	0	0	0	0	0	0	0	4	0	0	0	0	0	0
D_0__Eukaryota;D_1__SAR;D_2__Alveolata;D_3__Apicomplexa;D_6__Eugregarinorida;D_7__Lankesteria;D_8__Gregarinidae sp. from Phyllochaetopterus prolifica SR-2009a	Others	H	Rueckert et al. (2019)	0	0	16	0	50	0	89	0		0	0	68	0	67	0	0	0	6	0	3	0	0	0	0
D_0__Eukaryota;D_1__SAR;D_2__Alveolata;D_3__Apicomplexa;D_6__Eugregarinorida;D_7__Lankesteria;D_8__Lankesteria didemni	Others	H	Rueckert et al. (2019)	0	0	6	0	0	0	0	0		0	0	0	0	0	0	0	0	0	0	0	0	0	0	0
D_0__Eukaryota;D_1__SAR;D_2__Alveolata;D_3__Apicomplexa;D_6__Eugregarinorida;D_7__Lankesteria;__	Others	H	Rueckert et al. (2019)	0	0	4	0	0	0	0	0		0	0	0	0	0	2	0	0	5	0	7	0	0	0	0
D_0__Eukaryota;D_1__SAR;D_2__Alveolata;D_3__Apicomplexa;D_6__Eugregarinorida;D_7__Lecudina;__	Others	H	Rueckert et al. (2019)	0	0	0	0	0	0	0	0		0	0	0	0	0	0	0	0	0	0	47	0	0	0	0
D_0__Eukaryota;D_1__SAR;D_2__Alveolata;D_3__Apicomplexa;D_6__Eugregarinorida;__;__	Others	H	Rueckert et al. (2019)	0	0	0	0	0	28	0	0		0	0	0	0	0	0	0	0	0	0	0	0	0	0	0
D_0__Eukaryota;D_1__SAR;D_2__Alveolata;D_3__Apicomplexa;__;__;__	Others	H	Rueckert et al. (2019)	0	0	8	0	0	0	0	8		0	0	0	0	55	0	0	0	0	0	0	0	0	0	0
D_0__Eukaryota;D_1__SAR;D_2__Alveolata;D_3__Ciliophora;Ambiguous_taxa;Ambiguous_taxa;D_8__uncultured eukaryote	Ciliophora	H	Verni and Rosati (2011)	0	0	0	0	0	0	0	8		0	0	0	0	0	0	0	0	0	0	0	0	0	0	0
D_0__Eukaryota;D_1__SAR;D_2__Alveolata;D_3__Ciliophora;D_4__Intramacronucleata;D_5__Spirotrichea;Ambiguous_taxa	Ciliophora	H	Verni and Rosati (2011)	2	15	51	0	0	16	0	0		67	5	4	0	0	0	0	0	0	7	0	0	182	58	0
D_0__Eukaryota;D_1__SAR;D_2__Alveolata;D_3__Ciliophora;D_4__Postciliodesmatophora;D_5__Heterotrichea;D_6__metagenome	Ciliophora	H	Verni and Rosati (2011)	0	3	0	0	0	0	0	0		0	0	0	0	0	4	0	0	0	0	8	0	0	0	0
D_0__Eukaryota;D_1__SAR;D_2__Alveolata;D_3__Ciliophora;D_5__Heterotrichea;D_6__Stentor;Ambiguous_taxa	Ciliophora	H	Verni and Rosati (2011)	0	0	0	0	0	0	0	0		0	0	0	0	0	0	3	0	0	0	0	0	0	0	0
D_0__Eukaryota;D_1__SAR;D_2__Alveolata;D_3__Ciliophora;D_5__Spirotrichea;Ambiguous_taxa;Ambiguous_taxa	Ciliophora	H	Verni and Rosati (2011)	0	0	8	0	7	0	4	0		6	0	0	36	15	0	0	0	0	0	0	0	0	0	0
D_0__Eukaryota;D_1__SAR;D_2__Alveolata;D_3__Ciliophora;D_5__Spirotrichea;D_6__Choreotrichia;Ambiguous_taxa	Ciliophora	H	Verni and Rosati (2011)	0	0	0	0	0	0	0	0		0	0	0	0	0	10	0	0	8	0	0	0	0	0	0
D_0__Eukaryota;D_1__SAR;D_2__Alveolata;D_3__Ciliophora;D_5__Spirotrichea;D_6__Choreotrichia;D_7__uncultured marine eukaryote	Ciliophora	H	Verni and Rosati (2011)	0	0	10	0	0	0	0	0		0	0	0	11	0	0	0	23	0	0	0	0	0	0	0
D_0__Eukaryota;D_1__SAR;D_2__Alveolata;D_3__Ciliophora;D_5__Spirotrichea;D_6__Oligotrichia;D_7__uncultured eukaryote	Ciliophora	H	Verni and Rosati (2011)	0	0	0	0	0	0	0	0		0	0	4	0	0	0	0	0	0	0	0	0	0	0	0
D_0__Eukaryota;D_1__SAR;D_2__Alveolata;D_3__Ciliophora;D_6__Choreotrichia;Ambiguous_taxa;D_8__uncultured Tintinnida	Ciliophora	H	Verni and Rosati (2011)	0	0	0	0	0	0	6	0		0	0	0	0	0	0	0	0	0	0	0	0	0	0	0
D_0__Eukaryota;D_1__SAR;D_2__Alveolata;D_3__Ciliophora;D_6__Choreotrichia;Ambiguous_taxa;__	Ciliophora	H	Verni and Rosati (2011)	0	0	0	0	3	0	0	0		0	0	0	0	0	0	0	0	0	0	0	0	0	0	0
D_0__Eukaryota;D_1__SAR;D_2__Alveolata;D_3__Ciliophora;D_6__Choreotrichia;D_7__Amphorellopsis;Ambiguous_taxa	Ciliophora	H	Verni and Rosati (2011)	10	33	96	15	54	92	173	17		1395	164	117	140	106	105	36	70	37	73	55	0	76	438	219
D_0__Eukaryota;D_1__SAR;D_2__Alveolata;D_3__Ciliophora;D_6__Choreotrichia;D_7__Codonella;D_8__uncultured Tintinnida	Ciliophora	H	Verni and Rosati (2011)	0	0	0	0	0	0	7	0		0	28	0	0	29	7	0	0	0	0	5	0	0	0	0
D_0__Eukaryota;D_1__SAR;D_2__Alveolata;D_3__Ciliophora;D_6__Choreotrichia;D_7__Eutintinnus;Ambiguous_taxa	Ciliophora	H	Verni and Rosati (2011)	10	79	10	0	0	0	20	5		0	134	89	94	31	0	0	4	0	16	2	0	0	8	5
D_0__Eukaryota;D_1__SAR;D_2__Alveolata;D_3__Ciliophora;D_6__Choreotrichia;D_7__Eutintinnus;D_8__uncultured Tintinnida	Ciliophora	H	Verni and Rosati (2011)	0	0	0	0	0	0	2	0		0	0	14	0	0	0	0	0	0	0	0	0	0	0	0
D_0__Eukaryota;D_1__SAR;D_2__Alveolata;D_3__Ciliophora;D_6__Choreotrichia;D_7__Metacylis;D_8__Metacylis angulata	Ciliophora	H	Verni and Rosati (2011)	0	0	0	0	0	0	0	0		0	0	0	0	0	0	0	0	6	11	0	0	0	9	0
D_0__Eukaryota;D_1__SAR;D_2__Alveolata;D_3__Ciliophora;D_6__Choreotrichia;D_7__Parastrombidinopsis;D_8__Parastrombidinopsis minima	Ciliophora	H	Verni and Rosati (2011)	0	0	0	0	0	0	0	0		0	0	0	0	0	0	0	0	0	0	0	0	4	0	0
D_0__Eukaryota;D_1__SAR;D_2__Alveolata;D_3__Ciliophora;D_6__Choreotrichia;D_7__Parastrombidinopsis;__	Ciliophora	H	Verni and Rosati (2011)	0	0	0	0	0	0	0	0		0	6	0	7	5	8	0	25	0	0	0	0	0	0	0
D_0__Eukaryota;D_1__SAR;D_2__Alveolata;D_3__Ciliophora;D_6__Choreotrichia;D_7__Pelagostrobilidium;Ambiguous_taxa	Ciliophora	H	Verni and Rosati (2011)	0	0	8	0	0	0	0	0		89	74	0	0	0	0	5	0	17	0	0	0	0	15	0
D_0__Eukaryota;D_1__SAR;D_2__Alveolata;D_3__Ciliophora;D_6__Choreotrichia;D_7__Pelagostrobilidium;D_8__uncultured alveolate	Ciliophora	H	Verni and Rosati (2011)	0	2	0	0	0	0	0	0		83	262	0	16	10	0	0	0	0	8	0	0	10	67	19
D_0__Eukaryota;D_1__SAR;D_2__Alveolata;D_3__Ciliophora;D_6__Choreotrichia;D_7__Pelagostrobilidium;D_8__uncultured eukaryote	Ciliophora	H	Verni and Rosati (2011)	0	1009	106	65	72	111	20	50		324	0	18	0	0	7	0	2	0	15	0	0	10	366	28
D_0__Eukaryota;D_1__SAR;D_2__Alveolata;D_3__Ciliophora;D_6__Choreotrichia;D_7__Pelagostrobilidium;__	Ciliophora	H	Verni and Rosati (2011)	0	0	13	0	24	0	27	0		20	0	0	8	0	0	0	0	0	4	0	0	11	6	0
D_0__Eukaryota;D_1__SAR;D_2__Alveolata;D_3__Ciliophora;D_6__Choreotrichia;D_7__Rimostrombidium;D_8__uncultured ciliate	Ciliophora	H	Verni and Rosati (2011)	0	0	16	0	4	0	14	0		143	4	5	8	0	5	0	5	0	7	0	0	0	34	0
D_0__Eukaryota;D_1__SAR;D_2__Alveolata;D_3__Ciliophora;D_6__Choreotrichia;D_7__Rimostrombidium;D_8__uncultured eukaryote	Ciliophora	H	Verni and Rosati (2011)	0	357	138	19	15	30	116	64		2019	49	16	13	0	3	4	7	0	17	0	0	10	469	24
D_0__Eukaryota;D_1__SAR;D_2__Alveolata;D_3__Ciliophora;D_6__Choreotrichia;D_7__Rimostrombidium;__	Ciliophora	H	Verni and Rosati (2011)	0	0	0	0	0	0	0	0		77	12	6	0	0	4	0	4	0	0	0	0	5	49	0
D_0__Eukaryota;D_1__SAR;D_2__Alveolata;D_3__Ciliophora;D_6__Choreotrichia;D_7__Steenstrupiella;Ambiguous_taxa	Ciliophora	H	Verni and Rosati (2011)	0	0	0	0	12	0	0	0		0	0	0	8	0	0	0	0	0	7	0	0	0	0	0
D_0__Eukaryota;D_1__SAR;D_2__Alveolata;D_3__Ciliophora;D_6__Choreotrichia;D_7__Strombidinopsis;Ambiguous_taxa	Ciliophora	H	Verni and Rosati (2011)	0	0	0	0	0	0	0	0		0	9	0	0	0	0	0	0	0	0	0	0	0	0	0
D_0__Eukaryota;D_1__SAR;D_2__Alveolata;D_3__Ciliophora;D_6__Choreotrichia;D_7__Tintinnopsis;Ambiguous_taxa	Ciliophora	H	Verni and Rosati (2011)	98	154	25	0	7	29	9	15		169	254	18	47	28	11	16	0	14	11	13	0	0	62	14
D_0__Eukaryota;D_1__SAR;D_2__Alveolata;D_3__Ciliophora;D_6__Choreotrichia;D_7__Tintinnopsis;__	Ciliophora	H	Verni and Rosati (2011)	0	0	0	0	0	0	0	0		0	6	0	0	0	0	0	0	0	0	0	0	0	0	0
D_0__Eukaryota;D_1__SAR;D_2__Alveolata;D_3__Ciliophora;D_6__Choreotrichia;D_7__Undella;D_8__Parundella aculeata	Ciliophora	H	Verni and Rosati (2011)	0	0	0	0	0	0	0	0		0	0	24	0	0	0	0	0	0	0	0	0	0	0	0
D_0__Eukaryota;D_1__SAR;D_2__Alveolata;D_3__Ciliophora;D_6__Choreotrichia;D_7__Xystonella;Ambiguous_taxa	Ciliophora	H	Verni and Rosati (2011)	0	0	0	0	0	0	0	0		0	0	193	0	0	0	0	0	0	0	0	0	0	0	0
D_0__Eukaryota;D_1__SAR;D_2__Alveolata;D_3__Ciliophora;D_6__Choreotrichia;D_7__uncultured;Ambiguous_taxa	Ciliophora	H	Verni and Rosati (2011)	0	45	548	34	110	604	147	145		234	104	65	48	39	24	6	144	15	77	12	10	36	207	7
D_0__Eukaryota;D_1__SAR;D_2__Alveolata;D_3__Ciliophora;D_6__Choreotrichia;D_7__uncultured;D_8__Pelagostrobilidium sp. LS781	Ciliophora	H	Verni and Rosati (2011)	0	0	58	0	32	0	13	0		12	49	6	50	24	22	7	50	23	21	4	0	5	6	0
D_0__Eukaryota;D_1__SAR;D_2__Alveolata;D_3__Ciliophora;D_6__Choreotrichia;D_7__uncultured;D_8__uncultured eukaryote	Ciliophora	H	Verni and Rosati (2011)	0	0	13	0	52	0	9	0		163	71	30	32	50	25	5	13	7	16	0	0	16	79	19
D_0__Eukaryota;D_1__SAR;D_2__Alveolata;D_3__Ciliophora;D_6__Choreotrichia;D_7__uncultured;__	Ciliophora	H	Verni and Rosati (2011)	0	0	0	0	0	0	0	0		0	0	0	0	5	0	0	0	0	0	0	0	0	3	0
D_0__Eukaryota;D_1__SAR;D_2__Alveolata;D_3__Ciliophora;D_6__Choreotrichia;__;__	Ciliophora	H	Verni and Rosati (2011)	0	0	0	0	9	12	14	0		15	34	3	41	17	10	9	94	0	31	0	0	21	40	0
D_0__Eukaryota;D_1__SAR;D_2__Alveolata;D_3__Ciliophora;D_6__Euplotia;D_7__Aspidisca;D_8__Aspidisca aculeata	Ciliophora	H	Verni and Rosati (2011)	0	0	7	0	0	0	0	0		0	0	0	0	0	0	0	0	0	0	0	0	0	0	0
D_0__Eukaryota;D_1__SAR;D_2__Alveolata;D_3__Ciliophora;D_6__Haptoria;D_7__Didinium;D_8__uncultured eukaryote	Ciliophora	H	Verni and Rosati (2011)	0	37	4	0	0	0	0	0		0	0	2	0	0	0	0	0	0	0	0	0	0	0	0
D_0__Eukaryota;D_1__SAR;D_2__Alveolata;D_3__Ciliophora;D_6__Haptoria;D_7__Loxophyllum;Ambiguous_taxa	Ciliophora	H	Verni and Rosati (2011)	0	0	0	0	0	0	2	0		15	0	7	0	0	0	0	9	0	0	0	0	0	0	0
D_0__Eukaryota;D_1__SAR;D_2__Alveolata;D_3__Ciliophora;D_6__Haptoria;__;__	Ciliophora	H	Verni and Rosati (2011)	0	0	0	0	0	0	0	4		6	0	0	0	0	22	0	0	0	0	4	0	0	0	0
D_0__Eukaryota;D_1__SAR;D_2__Alveolata;D_3__Ciliophora;D_6__Mesodiniidae;D_7__uncultured;D_8__uncultured ciliate	Ciliophora	M	Johnson et al. (2016)	0	0	0	0	2	0	0	0		0	0	0	0	0	0	0	0	0	0	0	0	0	0	0
D_0__Eukaryota;D_1__SAR;D_2__Alveolata;D_3__Ciliophora;D_6__Nassophorea;D_7__uncultured;Ambiguous_taxa	Ciliophora	H	Verni and Rosati (2011)	0	4	68	28	64	5	23	29		54	29	61	111	64	44	15	81	23	48	7	0	14	50	0
D_0__Eukaryota;D_1__SAR;D_2__Alveolata;D_3__Ciliophora;D_6__Nassophorea;D_7__uncultured;D_8__Uncultured marine colpodean ciliate DH147-EKD23	Ciliophora	H	Verni and Rosati (2011)	0	0	0	0	0	0	0	0		0	0	0	0	0	2	0	0	0	0	0	0	0	0	0
D_0__Eukaryota;D_1__SAR;D_2__Alveolata;D_3__Ciliophora;D_6__Nassophorea;D_7__uncultured;D_8__uncultured ciliate	Ciliophora	H	Verni and Rosati (2011)	0	0	4	0	5	0	15	5		0	0	11	0	0	0	0	0	0	2	0	0	0	0	0
D_0__Eukaryota;D_1__SAR;D_2__Alveolata;D_3__Ciliophora;D_6__Nassophorea;D_7__uncultured;D_8__uncultured eukaryote	Ciliophora	H	Verni and Rosati (2011)	0	0	0	3	29	0	0	2		0	0	9	0	4	0	0	0	0	0	0	0	0	0	0
D_0__Eukaryota;D_1__SAR;D_2__Alveolata;D_3__Ciliophora;D_6__Nassophorea;D_7__uncultured;__	Ciliophora	H	Verni and Rosati (2011)	0	0	24	7	34	0	27	12		0	3	13	24	11	6	0	15	0	0	0	0	0	0	0
D_0__Eukaryota;D_1__SAR;D_2__Alveolata;D_3__Ciliophora;D_6__Nassophorea;__;__	Ciliophora	H	Verni and Rosati (2011)	0	0	0	0	5	0	13	6		24	7	0	11	7	12	0	3	0	9	12	0	0	17	10
D_0__Eukaryota;D_1__SAR;D_2__Alveolata;D_3__Ciliophora;D_6__Oligotrichia;Ambiguous_taxa;Ambiguous_taxa	Ciliophora	H	Verni and Rosati (2011)	4	12	53	10	0	0	19	44		189	56	46	36	27	0	0	0	0	0	0	0	141	18	76
D_0__Eukaryota;D_1__SAR;D_2__Alveolata;D_3__Ciliophora;D_6__Oligotrichia;Ambiguous_taxa;D_8__uncultured eukaryote	Ciliophora	H	Verni and Rosati (2011)	15	521	213	4	0	0	0	104		143	0	0	9	0	0	18	24	24	7	0	0	546	127	58
D_0__Eukaryota;D_1__SAR;D_2__Alveolata;D_3__Ciliophora;D_6__Oligotrichia;Ambiguous_taxa;__	Ciliophora	H	Verni and Rosati (2011)	24	102	64	0	0	0	50	0		0	20	0	0	9	62	0	0	0	0	0	0	0	0	0
D_0__Eukaryota;D_1__SAR;D_2__Alveolata;D_3__Ciliophora;D_6__Oligotrichia;D_7__Pseudotontonia;D_8__uncultured eukaryote	Ciliophora	H	Verni and Rosati (2011)	0	30	108	5	41	0	44	18		41	22	33	35	0	73	34	64	64	51	13	0	27	0	3
D_0__Eukaryota;D_1__SAR;D_2__Alveolata;D_3__Ciliophora;D_6__Oligotrichia;D_7__Spirostrombidium;D_8__uncultured eukaryote	Ciliophora	H	Verni and Rosati (2011)	0	97	0	0	0	0	0	0		58	18	18	16	0	0	9	10	32	0	0	0	0	24	11
D_0__Eukaryota;D_1__SAR;D_2__Alveolata;D_3__Ciliophora;D_6__Oligotrichia;D_7__Spirotontonia;Ambiguous_taxa	Ciliophora	H	Verni and Rosati (2011)	5	257	35	0	27	0	0	7		66	7	2	21	5	16	13	0	115	11	6	0	12	24	0
D_0__Eukaryota;D_1__SAR;D_2__Alveolata;D_3__Ciliophora;D_6__Oligotrichia;D_7__Spirotontonia;D_8__uncultured eukaryote	Ciliophora	H	Verni and Rosati (2011)	2	0	11	0	0	0	27	0		8	24	17	21	19	49	18	62	6	10	0	0	0	19	11
D_0__Eukaryota;D_1__SAR;D_2__Alveolata;D_3__Ciliophora;D_6__Oligotrichia;D_7__Spirotontonia;__	Ciliophora	H	Verni and Rosati (2011)	0	0	0	0	0	0	4	0		0	0	0	0	0	0	0	0	0	0	0	0	0	0	0
D_0__Eukaryota;D_1__SAR;D_2__Alveolata;D_3__Ciliophora;D_6__Oligotrichia;D_7__Strombidium;Ambiguous_taxa	Ciliophora	H	Verni and Rosati (2011)	8	517	69	10	86	0	71	39		279	13	18	0	0	6	5	18	10	24	0	0	60	99	52
D_0__Eukaryota;D_1__SAR;D_2__Alveolata;D_3__Ciliophora;D_6__Oligotrichia;D_7__Strombidium;D_8__Strombidium chlorophilum	Ciliophora	M	Montagnes et al. (1988)	0	0	0	0	0	9	0	0		0	0	0	0	0	0	0	0	0	0	0	0	0	0	0
D_0__Eukaryota;D_1__SAR;D_2__Alveolata;D_3__Ciliophora;D_6__Oligotrichia;D_7__Strombidium;D_8__uncultured ciliate	Ciliophora	H	Verni and Rosati (2011)	0	0	7	0	5	0	4	0		111	0	0	0	9	14	0	16	0	0	0	0	9	52	0
D_0__Eukaryota;D_1__SAR;D_2__Alveolata;D_3__Ciliophora;D_6__Oligotrichia;D_7__Strombidium;D_8__uncultured eukaryote	Ciliophora	H	Verni and Rosati (2011)	0	110	37	0	0	0	0	7		110	0	11	9	0	0	14	22	0	21	0	0	48	103	22
D_0__Eukaryota;D_1__SAR;D_2__Alveolata;D_3__Ciliophora;D_6__Oligotrichia;D_7__Strombidium;__	Ciliophora	H	Verni and Rosati (2011)	0	10	140	20	63	8	137	19		334	98	46	64	42	34	24	107	28	80	12	23	79	36	0
D_0__Eukaryota;D_1__SAR;D_2__Alveolata;D_3__Ciliophora;D_6__Oligotrichia;D_7__uncultured;D_8__seawater metagenome	Ciliophora	H	Verni and Rosati (2011)	5	155	181	14	18	18	59	50		253	48	13	11	13	0	0	12	6	13	10	0	17	149	32
D_0__Eukaryota;D_1__SAR;D_2__Alveolata;D_3__Ciliophora;D_6__Oligotrichia;D_7__uncultured;D_8__uncultured ciliate	Ciliophora	H	Verni and Rosati (2011)	0	0	47	0	0	64	47	0		688	150	31	71	3	2	15	16	5	30	0	2	7	129	0
D_0__Eukaryota;D_1__SAR;D_2__Alveolata;D_3__Ciliophora;D_6__Oligotrichia;D_7__uncultured;D_8__uncultured marine eukaryote	Ciliophora	H	Verni and Rosati (2011)	0	0	12	0	33	0	15	0		28	0	12	0	0	0	0	21	0	0	0	0	46	0	0
D_0__Eukaryota;D_1__SAR;D_2__Alveolata;D_3__Ciliophora;D_6__Oligotrichia;__;__	Ciliophora	H	Verni and Rosati (2011)	14	1030	694	52	209	29	136	89		1327	189	83	60	146	95	44	184	469	76	40	16	489	634	72
D_0__Eukaryota;D_1__SAR;D_2__Alveolata;D_3__Ciliophora;D_6__Prostomatea;D_7__Cryptocaryon;Ambiguous_taxa	Ciliophora	H	Verni and Rosati (2011)	6	205	126	45	13	10	51	14		59	0	4	8	15	14	0	23	6	15	5	3	8	24	37
D_0__Eukaryota;D_1__SAR;D_2__Alveolata;D_3__Ciliophora;D_6__Prostomatea;D_7__Cryptocaryon;D_8__Ciliate sp. NCMS0601	Ciliophora	H	Verni and Rosati (2011)	0	0	0	0	0	0	0	0		0	0	0	0	0	0	0	0	0	0	0	0	2	0	0
D_0__Eukaryota;D_1__SAR;D_2__Alveolata;D_3__Ciliophora;D_6__Prostomatea;D_7__Cryptocaryon;D_8__uncultured eukaryote	Ciliophora	H	Verni and Rosati (2011)	0	71	108	6	26	0	41	7		32	0	0	0	0	0	0	0	10	0	0	0	0	2	24
D_0__Eukaryota;D_1__SAR;D_2__Alveolata;D_3__Ciliophora;D_6__Prostomatea;D_7__Cryptocaryon;D_8__uncultured marine eukaryote	Ciliophora	H	Verni and Rosati (2011)	0	12	0	0	0	0	0	0		0	0	0	0	0	0	0	0	0	0	0	0	0	0	0
D_0__Eukaryota;D_1__SAR;D_2__Alveolata;D_3__Ciliophora;D_6__Prostomatea;D_7__Cryptocaryon;__	Ciliophora	H	Verni and Rosati (2011)	37	0	0	0	0	0	0	0		0	0	0	0	5	0	0	3	0	0	3	0	272	4	0
D_0__Eukaryota;D_1__SAR;D_2__Alveolata;D_3__Ciliophora;D_6__Prostomatea;D_7__Tiarina;Ambiguous_taxa	Ciliophora	H	Verni and Rosati (2011)	0	0	11	0	5	0	0	3		0	0	0	0	0	0	0	0	0	0	0	0	0	0	0
D_0__Eukaryota;D_1__SAR;D_2__Alveolata;D_3__Ciliophora;D_6__Prostomatea;__;__	Ciliophora	H	Verni and Rosati (2011)	58	51	0	0	0	0	0	14		0	0	0	0	0	0	0	10	0	0	0	0	0	0	0
D_0__Eukaryota;D_1__SAR;D_2__Alveolata;D_3__Ciliophora;D_7__Apostomatia;Ambiguous_taxa;Ambiguous_taxa	Ciliophora	H	Verni and Rosati (2011)	0	0	0	0	0	0	0	0		0	0	0	5	0	4	0	0	0	0	0	0	0	0	0
D_0__Eukaryota;D_1__SAR;D_2__Alveolata;D_3__Ciliophora;D_7__Apostomatia;D_8__Hyalophysa;D_9__uncultured marine eukaryote	Ciliophora	H	Verni and Rosati (2011)	0	0	7	0	62	0	12	0		13	14	0	0	0	15	0	0	0	0	0	0	0	0	0
D_0__Eukaryota;D_1__SAR;D_2__Alveolata;D_3__Ciliophora;D_7__Apostomatia;__;__	Ciliophora	H	Verni and Rosati (2011)	0	0	0	0	55	0	5	0		7	0	0	0	0	5	0	12	0	0	4	0	4	7	0
D_0__Eukaryota;D_1__SAR;D_2__Alveolata;D_3__Ciliophora;D_7__Cyrtophoria;D_8__Pithites;Ambiguous_taxa	Ciliophora	H	Verni and Rosati (2011)	0	0	4	0	0	0	0	0		0	0	0	0	10	8	0	0	0	0	0	0	0	0	0
D_0__Eukaryota;D_1__SAR;D_2__Alveolata;D_3__Ciliophora;D_7__Cyrtophoria;D_8__Pithites;D_9__metagenome	Ciliophora	H	Verni and Rosati (2011)	0	0	0	0	0	0	0	0		0	0	0	3	0	2	0	3	0	0	0	0	0	0	0
D_0__Eukaryota;D_1__SAR;D_2__Alveolata;D_3__Ciliophora;D_7__Cyrtophoria;D_8__Pithites;D_9__uncultured eukaryote	Ciliophora	H	Verni and Rosati (2011)	0	2	0	0	13	0	24	0		35	10	0	11	29	24	0	15	3	8	0	0	13	10	0
D_0__Eukaryota;D_1__SAR;D_2__Alveolata;D_3__Ciliophora;D_7__Cyrtophoria;D_8__Pithites;__	Ciliophora	H	Verni and Rosati (2011)	0	5	16	0	0	0	0	0		0	0	0	0	0	0	0	0	0	0	0	0	0	0	0
D_0__Eukaryota;D_1__SAR;D_2__Alveolata;D_3__Ciliophora;D_7__Cyrtophoria;D_8__Trithigmostoma;Ambiguous_taxa	Ciliophora	H	Verni and Rosati (2011)	0	0	0	0	0	0	0	0		8	0	19	0	7	5	0	0	0	0	8	0	0	0	17
D_0__Eukaryota;D_1__SAR;D_2__Alveolata;D_3__Ciliophora;D_7__Cyrtophoria;D_8__Trochilia;D_9__Trochilia petrani	Ciliophora	H	Verni and Rosati (2011)	0	0	0	0	0	0	0	0		0	0	21	0	5	0	0	0	3	0	0	0	0	0	5
D_0__Eukaryota;D_1__SAR;D_2__Alveolata;D_3__Ciliophora;D_7__Plagiopylida;D_8__Trimyema;D_9__uncultured eukaryote	Ciliophora	H	Verni and Rosati (2011)	0	0	0	0	0	0	0	0		0	0	0	0	0	0	0	0	0	0	0	0	0	2	0
D_0__Eukaryota;D_1__SAR;D_2__Alveolata;D_3__Ciliophora;D_7__Scuticociliatia;D_8__uncultured;Ambiguous_taxa	Ciliophora	H	Verni and Rosati (2011)	0	0	0	0	0	0	0	20		0	0	0	0	0	0	0	0	0	0	0	0	0	0	0
D_0__Eukaryota;D_1__SAR;D_2__Alveolata;D_3__Ciliophora;D_7__Scuticociliatia;D_8__uncultured;D_9__uncultured eukaryote	Ciliophora	H	Verni and Rosati (2011)	0	0	21	0	45	0	12	32		10	0	9	0	5	3	0	0	0	0	0	0	0	11	0
D_0__Eukaryota;D_1__SAR;D_2__Alveolata;D_3__Ciliophora;D_7__Scuticociliatia;D_8__uncultured;__	Ciliophora	H	Verni and Rosati (2011)	0	0	0	0	0	0	0	11		0	0	0	0	0	0	0	0	0	0	0	0	0	0	0
D_0__Eukaryota;D_1__SAR;D_2__Alveolata;D_3__Ciliophora;D_7__Suctoria;D_8__Ephelota;D_9__Ephelota sp. OOS-2003	Ciliophora	H	Verni and Rosati (2011)	0	0	23	0	0	0	0	0		0	0	0	0	0	0	0	0	0	0	0	0	0	0	0
D_0__Eukaryota;D_1__SAR;D_2__Alveolata;D_3__Ciliophora;__;__;__	Ciliophora	H	Verni and Rosati (2011)	0	27	195	6	26	0	2	16		86	20	18	4	0	17	6	0	9	0	0	4	0	12	32
D_0__Eukaryota;D_1__SAR;D_2__Alveolata;D_3__Dinoflagellata;Ambiguous_taxa;Ambiguous_taxa;Ambiguous_taxa	Dinoflagellata	u		17	57	21	0	82	0	0	15		514	0	0	0	0	19	0	0	0	0	0	0	7	64	0
D_0__Eukaryota;D_1__SAR;D_2__Alveolata;D_3__Dinoflagellata;Ambiguous_taxa;Ambiguous_taxa;__	Dinoflagellata	u		0	0	0	0	0	0	0	0		0	0	0	0	0	14	0	0	0	0	0	0	0	0	0
D_0__Eukaryota;D_1__SAR;D_2__Alveolata;D_3__Dinoflagellata;D_4__Dinophyceae;D_5__uncultured;Ambiguous_taxa	Dinoflagellata	u		15	291	248	12	98	83	108	25		804	168	58	196	161	153	70	471	248	108	46	6	215	125	0
D_0__Eukaryota;D_1__SAR;D_2__Alveolata;D_3__Dinoflagellata;D_4__Dinophyceae;D_5__uncultured;D_6__uncultured eukaryote	Dinoflagellata	u		0	0	0	0	0	0	0	0		8	0	0	0	0	0	0	0	0	0	0	0	0	0	0
D_0__Eukaryota;D_1__SAR;D_2__Alveolata;D_3__Dinoflagellata;D_4__Dinophyceae;D_5__uncultured;D_6__uncultured marine dinoflagellate	Dinoflagellata	u		0	0	0	0	0	0	0	25		0	0	0	0	0	0	0	0	0	0	0	0	0	0	0
D_0__Eukaryota;D_1__SAR;D_2__Alveolata;D_3__Dinoflagellata;D_4__Dinophyceae;D_5__uncultured;D_6__uncultured marine picoplankton	Dinoflagellata	u		34	157	98	27	136	32	57	17		63	34	111	14	18	0	18	48	41	49	22	0	207	68	182
D_0__Eukaryota;D_1__SAR;D_2__Alveolata;D_3__Dinoflagellata;D_4__Dinophyceae;__;__	Dinoflagellata	u		0	11	0	0	0	0	0	0		0	0	0	0	0	0	0	0	0	0	0	0	0	0	0
D_0__Eukaryota;D_1__SAR;D_2__Alveolata;D_3__Dinoflagellata;D_4__Incertae Sedis;D_5__Blastodinium;Ambiguous_taxa	Dinoflagellata	H	Skovgaard et al. (2012)	18	152	796	586	161	279	584	224		285	112	2146	460	560	268	120	217	269	195	123	0	223	167	109
D_0__Eukaryota;D_1__SAR;D_2__Alveolata;D_3__Dinoflagellata;D_4__Incertae Sedis;D_5__Haplozoon;Ambiguous_taxa	Dinoflagellata	H	Gómez (2012)	0	386	87	22	28	28	34	15		203	163	21	299	68	29	83	273	56	42	10	9	28	110	42
D_0__Eukaryota;D_1__SAR;D_2__Alveolata;D_3__Dinoflagellata;D_4__Noctilucales;D_5__Abedinium;Ambiguous_taxa	Dinoflagellata	H	Stoecker (1999)	0	0	10	0	0	0	0	0		0	0	0	0	0	0	0	0	0	0	0	0	0	0	0
D_0__Eukaryota;D_1__SAR;D_2__Alveolata;D_3__Dinoflagellata;D_4__Noctilucales;D_5__Kofoidinium;D_6__Kofoidinium cf. pavillardii	Dinoflagellata	H	Stoecker (1999)	0	0	0	0	0	0	0	0		0	0	10	0	0	0	0	0	0	0	0	0	0	0	0
D_0__Eukaryota;D_1__SAR;D_2__Alveolata;D_3__Dinoflagellata;D_4__Noctilucales;D_5__uncultured eukaryote;D_6__uncultured eukaryote	Dinoflagellata	H	Stoecker (1999)	3	0	0	0	0	23	33	11		160	88	91	188	216	112	76	69	81	17	63	0	14	75	33
D_0__Eukaryota;D_1__SAR;D_2__Alveolata;D_3__Dinoflagellata;D_5__Dinophysiales;D_6__Sinophysis;Ambiguous_taxa	Dinoflagellata	H	Quod et al. (1999)	0	0	30	0	56	0	21	0		0	0	0	0	40	9	6	0	0	0	6	0	0	0	0
D_0__Eukaryota;D_1__SAR;D_2__Alveolata;D_3__Dinoflagellata;D_5__Dinophysiales;D_6__Sinophysis;D_7__metagenome	Dinoflagellata	H	Quod et al. (1999)	0	0	0	0	0	0	0	7		0	17	0	0	0	0	0	0	0	0	0	0	0	0	0
D_0__Eukaryota;D_1__SAR;D_2__Alveolata;D_3__Dinoflagellata;D_5__Dinophysiales;D_6__Sinophysis;D_7__uncultured marine eukaryote	Dinoflagellata	H	Quod et al. (1999)	0	0	14	0	0	0	0	11		0	36	0	0	4	0	0	0	0	0	0	0	0	0	0
D_0__Eukaryota;D_1__SAR;D_2__Alveolata;D_3__Dinoflagellata;D_5__Dinophysiales;D_6__Sinophysis;__	Dinoflagellata	H	Quod et al. (1999)	0	0	0	0	0	0	0	0		0	0	75	0	0	0	0	0	0	0	5	0	0	2	0
D_0__Eukaryota;D_1__SAR;D_2__Alveolata;D_3__Dinoflagellata;D_5__Gymnodiniphycidae;D_6__Amphidinium;D_7__uncultured eukaryote	Dinoflagellata	M	Sommeria-Klein et al. (2021)	5	0	69	11	136	0	9	20		70	98	235	177	1011	118	116	780	98	32	132	0	72	14	0
D_0__Eukaryota;D_1__SAR;D_2__Alveolata;D_3__Dinoflagellata;D_5__Gymnodiniphycidae;D_6__Amphidinium;D_7__uncultured marine eukaryote	Dinoflagellata	M	Sommeria-Klein et al. (2021)	0	0	7	0	18	0	0	0		0	0	0	0	0	0	0	0	0	0	0	0	0	0	0
D_0__Eukaryota;D_1__SAR;D_2__Alveolata;D_3__Dinoflagellata;D_5__Gymnodiniphycidae;D_6__Gyrodinium;Ambiguous_taxa	Dinoflagellata	H	Daugbjerg et al. (2000)	59	3467	2722	77	174	1776	221	787		348	2815	1348	1113	701	901	2721	4674	777	516	331	122	291	229	192
D_0__Eukaryota;D_1__SAR;D_2__Alveolata;D_3__Dinoflagellata;D_5__Gymnodiniphycidae;D_6__Gyrodinium;D_7__uncultured Gyrodinium	Dinoflagellata	H	Daugbjerg et al. (2000)	0	0	0	0	0	0	0	0		0	0	6	0	0	0	0	0	0	0	0	0	0	0	0
D_0__Eukaryota;D_1__SAR;D_2__Alveolata;D_3__Dinoflagellata;D_5__Gymnodiniphycidae;D_6__Gyrodinium;D_7__uncultured marine alveolate	Dinoflagellata	H	Daugbjerg et al. (2000)	0	0	0	0	0	0	0	0		0	0	0	0	0	0	0	0	0	29	0	0	0	0	0
D_0__Eukaryota;D_1__SAR;D_2__Alveolata;D_3__Dinoflagellata;D_5__Gymnodiniphycidae;D_6__Gyrodinium;D_7__uncultured marine dinoflagellate	Dinoflagellata	H	Daugbjerg et al. (2000)	155	27493	1363	0	87	0	91	1463		52	0	42	945	375	1680	535	362	526	582	251	13	728	155	614
D_0__Eukaryota;D_1__SAR;D_2__Alveolata;D_3__Dinoflagellata;D_5__Gymnodiniphycidae;D_6__Gyrodinium;__	Dinoflagellata	H	Daugbjerg et al. (2000)	22	1963	347	50	194	349	1212	68		626	667	1136	1504	1003	644	318	1286	475	437	446	14	199	420	329
D_0__Eukaryota;D_1__SAR;D_2__Alveolata;D_3__Dinoflagellata;D_5__Gymnodiniphycidae;D_6__Katodinium;D_7__uncultured eukaryote	Dinoflagellata	H	Smith (1996)	0	0	0	0	0	0	0	0		0	5	0	8	0	7	0	12	0	0	9	0	0	9	0
D_0__Eukaryota;D_1__SAR;D_2__Alveolata;D_3__Dinoflagellata;D_5__Gymnodiniphycidae;D_6__uncultured;Ambiguous_taxa	Dinoflagellata	u		0	0	0	0	0	0	0	0		0	0	37	0	0	7	0	9	8	0	0	0	0	3	0
D_0__Eukaryota;D_1__SAR;D_2__Alveolata;D_3__Dinoflagellata;D_5__Gymnodiniphycidae;D_6__uncultured;D_7__uncultured eukaryote	Dinoflagellata	u		0	10	37	0	0	0	24	0		93	31	0	36	0	44	0	161	55	22	0	0	31	28	9
D_0__Eukaryota;D_1__SAR;D_2__Alveolata;D_3__Dinoflagellata;D_5__Gymnodiniphycidae;__;__	Dinoflagellata	u		0	2	0	0	0	0	0	0		0	0	0	0	0	0	0	0	0	0	0	0	0	0	0
D_0__Eukaryota;D_1__SAR;D_2__Alveolata;D_3__Dinoflagellata;D_6__Gonyaulacales;D_7__Alexandrium;Ambiguous_taxa	Dinoflagellata	M	Lim et al. (2019)	0	0	0	0	9	0	0	0		0	0	0	6	0	0	0	0	0	0	0	0	0	0	0
D_0__Eukaryota;D_1__SAR;D_2__Alveolata;D_3__Dinoflagellata;D_6__Gonyaulacales;D_7__Alexandrium;__	Dinoflagellata	M	Lim et al. (2019)	0	0	9	3	0	0	0	0		0	56	0	0	0	0	0	9	12	0	0	0	5	0	0
D_0__Eukaryota;D_1__SAR;D_2__Alveolata;D_3__Dinoflagellata;D_6__Gonyaulacales;D_7__Amylax;Ambiguous_taxa	Dinoflagellata	H	Jacobson and Anderson (1996)	0	0	0	0	0	0	0	0		0	0	0	0	0	0	0	0	0	0	4	0	0	0	0
D_0__Eukaryota;D_1__SAR;D_2__Alveolata;D_3__Dinoflagellata;D_6__Gonyaulacales;D_7__Azadinium;Ambiguous_taxa	Dinoflagellata	A	Tillmann et al. (2009)	0	82	0	0	0	0	0	0		0	96	409	235	267	96	66	60	0	0	23	0	0	0	60
D_0__Eukaryota;D_1__SAR;D_2__Alveolata;D_3__Dinoflagellata;D_6__Gonyaulacales;D_7__Azadinium;D_8__uncultured eukaryote	Dinoflagellata	A	Tillmann et al. (2009)	0	0	0	0	5	0	0	0		0	0	0	0	0	0	0	0	0	0	0	0	0	0	0
D_0__Eukaryota;D_1__SAR;D_2__Alveolata;D_3__Dinoflagellata;D_6__Gonyaulacales;D_7__Fragilidium;Ambiguous_taxa	Dinoflagellata	M	Hansen and Nielsen (1997)	11	0	0	0	0	0	0	0		0	0	0	0	0	0	0	0	0	0	0	0	0	0	0
D_0__Eukaryota;D_1__SAR;D_2__Alveolata;D_3__Dinoflagellata;D_6__Gonyaulacales;D_7__Goniodoma;D_8__Goniodoma polyedricum	Dinoflagellata	A	Gul and Saifullah (2012)	0	0	0	0	0	0	0	0		0	7	0	0	0	0	0	0	0	0	0	0	0	0	0
D_0__Eukaryota;D_1__SAR;D_2__Alveolata;D_3__Dinoflagellata;D_6__Gonyaulacales;D_7__Gonyaulax;Ambiguous_taxa	Dinoflagellata	M	Jeong et al. (2005)	2367	1457	184	5	26	161	24	1465		38	256	83	0	142	0	282	270	380	59	171	0	39	107	58
D_0__Eukaryota;D_1__SAR;D_2__Alveolata;D_3__Dinoflagellata;D_6__Gonyaulacales;D_7__Gonyaulax;D_8__Gonyaulax fragilis	Dinoflagellata	M	Jeong et al. (2005)	0	0	0	0	44	0	6	0		0	0	68	9	3	0	10	21	0	0	0	0	0	4	0
D_0__Eukaryota;D_1__SAR;D_2__Alveolata;D_3__Dinoflagellata;D_6__Gonyaulacales;D_7__Gonyaulax;D_8__uncultured marine eukaryote	Dinoflagellata	M	Jeong et al. (2005)	0	0	0	0	0	0	0	0		0	0	0	0	0	0	0	0	0	0	0	0	0	0	36
D_0__Eukaryota;D_1__SAR;D_2__Alveolata;D_3__Dinoflagellata;D_6__Gonyaulacales;D_7__Gonyaulax;__	Dinoflagellata	M	Jeong et al. (2005)	0	4	2	0	0	0	0	0		0	0	0	0	0	0	0	0	0	0	0	0	0	0	0
D_0__Eukaryota;D_1__SAR;D_2__Alveolata;D_3__Dinoflagellata;D_6__Gonyaulacales;D_7__Lingulodinium;Ambiguous_taxa	Dinoflagellata	M	Jeong et al. (2005)	0	0	0	0	0	0	0	0		0	0	0	0	3	0	0	0	0	0	0	0	0	0	0
D_0__Eukaryota;D_1__SAR;D_2__Alveolata;D_3__Dinoflagellata;D_6__Gonyaulacales;D_7__Neoceratium;Ambiguous_taxa	Dinoflagellata	M	Smalley et al. (2003)	0	74	343	8	17	92	370	14		0	365	13	1157	35	75	118	783	20	85	31	32	6	59	7
D_0__Eukaryota;D_1__SAR;D_2__Alveolata;D_3__Dinoflagellata;D_6__Gonyaulacales;D_7__Neoceratium;D_8__uncultured eukaryote	Dinoflagellata	M	Smalley et al. (2003)	0	13	6	0	66	0	9	5		71	25	37	77	0	208	25	108	153	18	63	0	40	47	0
D_0__Eukaryota;D_1__SAR;D_2__Alveolata;D_3__Dinoflagellata;D_6__Gonyaulacales;D_7__Ostreopsis;D_8__Ostreopsis cf. ovata	Dinoflagellata	A	Faust et al. (1996)	0	0	0	0	0	0	0	0		0	0	0	0	0	0	0	0	2	0	0	0	0	0	0
D_0__Eukaryota;D_1__SAR;D_2__Alveolata;D_3__Dinoflagellata;D_6__Gonyaulacales;D_7__Pyrocystis;Ambiguous_taxa	Dinoflagellata	A	Heimann et al. (2009)	0	0	0	0	0	0	0	0		0	0	0	2	0	0	0	0	0	0	0	0	0	0	0
D_0__Eukaryota;D_1__SAR;D_2__Alveolata;D_3__Dinoflagellata;D_6__Gonyaulacales;D_7__Pyrophacus;D_8__Pyrophacus steinii	Dinoflagellata	A	Pholpunthin et al. (1999)	0	0	0	0	0	0	0	0		0	0	11	106	0	0	0	0	0	0	0	0	0	0	0
D_0__Eukaryota;D_1__SAR;D_2__Alveolata;D_3__Dinoflagellata;D_6__Gonyaulacales;__;__	Dinoflagellata	u		0	0	0	0	0	0	0	0		0	0	0	0	0	3	0	0	3	0	0	0	0	0	13
D_0__Eukaryota;D_1__SAR;D_2__Alveolata;D_3__Dinoflagellata;D_6__Gymnodinium clade;Ambiguous_taxa;Ambiguous_taxa	Dinoflagellata	u		355	285	229	178	59	86	229	371		10	28	334	126	15	0	30	25	0	72	68	0	0	0	42
D_0__Eukaryota;D_1__SAR;D_2__Alveolata;D_3__Dinoflagellata;D_6__Gymnodinium clade;D_7__Chytriodinium;Ambiguous_taxa	Dinoflagellata	H	Gómez et al. (2009)	0	0	0	0	0	0	2	0		0	0	0	0	0	0	0	0	0	0	0	0	0	0	0
D_0__Eukaryota;D_1__SAR;D_2__Alveolata;D_3__Dinoflagellata;D_6__Gymnodinium clade;D_7__Erythropsidinium;Ambiguous_taxa	Dinoflagellata	H	Gómez et al. (2009)	55	63	473	130	440	416	179	91		685	1522	518	1285	506	1429	1056	1127	424	321	278	99	278	311	0
D_0__Eukaryota;D_1__SAR;D_2__Alveolata;D_3__Dinoflagellata;D_6__Gymnodinium clade;D_7__Erythropsidinium;D_8__uncultured eukaryote	Dinoflagellata	H	Gómez et al. (2009)	0	195	60	52	0	1080	149	16		0	1781	75	113	0	22	207	1275	0	610	0	11	162	0	22
D_0__Eukaryota;D_1__SAR;D_2__Alveolata;D_3__Dinoflagellata;D_6__Gymnodinium clade;D_7__Erythropsidinium;__	Dinoflagellata	H	Gómez et al. (2009)	0	0	0	0	0	0	45	0		0	0	0	0	0	20	23	0	0	0	0	0	0	0	0
D_0__Eukaryota;D_1__SAR;D_2__Alveolata;D_3__Dinoflagellata;D_6__Gymnodinium clade;D_7__Gymnodinium;D_8__uncultured eukaryote	Dinoflagellata	u		0	0	26	0	0	0	0	0		0	34	0	16	0	0	0	47	0	0	0	0	0	0	0
D_0__Eukaryota;D_1__SAR;D_2__Alveolata;D_3__Dinoflagellata;D_6__Gymnodinium clade;D_7__Paragymnodinium;Ambiguous_taxa	Dinoflagellata	M	Yoo et al. (2010)	0	0	0	0	0	0	0	0		0	0	20	0	27	9	17	0	10	6	0	0	5	0	13
D_0__Eukaryota;D_1__SAR;D_2__Alveolata;D_3__Dinoflagellata;D_6__Gymnodinium clade;D_7__Paragymnodinium;D_8__uncultured eukaryote	Dinoflagellata	M	Yoo et al. (2010)	0	22	59	32	36	0	114	12		86	46	52	28	10	14	15	40	31	51	28	0	58	26	0
D_0__Eukaryota;D_1__SAR;D_2__Alveolata;D_3__Dinoflagellata;D_6__Gymnodinium clade;D_7__Polykrikos;D_8__Polykrikos kofoidii	Dinoflagellata	H	Matsuoka et al. (2000)	2298	609	337	87	22	0	18	141		83	17	109	6	106	116	121	121	170	34	80	0	9	22	50
D_0__Eukaryota;D_1__SAR;D_2__Alveolata;D_3__Dinoflagellata;D_6__Gymnodinium clade;D_7__Woloszynskia;Ambiguous_taxa	Dinoflagellata	u		0	7	31	0	0	27	0	0		0	0	0	0	0	0	0	0	0	12	0	0	0	0	0
D_0__Eukaryota;D_1__SAR;D_2__Alveolata;D_3__Dinoflagellata;D_6__Gymnodinium clade;D_7__Woloszynskia;D_8__Chytriodinium sp. Atlantic	Dinoflagellata	H	Gómez et al. (2009)	0	0	0	0	0	0	0	0		0	0	0	4	0	0	0	0	0	6	0	0	0	0	0
D_0__Eukaryota;D_1__SAR;D_2__Alveolata;D_3__Dinoflagellata;D_6__Gymnodinium clade;D_7__Woloszynskia;D_8__uncultured eukaryote	Dinoflagellata	u		0	0	0	0	0	0	0	0		0	0	0	0	13	0	0	0	0	0	0	0	0	0	0
D_0__Eukaryota;D_1__SAR;D_2__Alveolata;D_3__Dinoflagellata;D_6__Gymnodinium clade;__;__	Dinoflagellata	u		43	467	406	31	263	25	235	36		69	53	232	316	304	150	152	51	91	178	34	0	132	51	0
D_0__Eukaryota;D_1__SAR;D_2__Alveolata;D_3__Dinoflagellata;D_6__Incertae Sedis;D_7__Akashiwo;Ambiguous_taxa	Dinoflagellata	M	Burkholder et al. (2008)	0	0	3	0	0	0	0	0		0	0	0	0	0	0	0	0	7	2	0	0	0	0	0
D_0__Eukaryota;D_1__SAR;D_2__Alveolata;D_3__Dinoflagellata;D_6__Incertae Sedis;D_7__Akashiwo;D_8__uncultured eukaryote	Dinoflagellata	M	Burkholder et al. (2008)	0	0	0	0	0	0	0	0		0	0	0	0	0	14	0	23	6	3	0	0	0	5	0
D_0__Eukaryota;D_1__SAR;D_2__Alveolata;D_3__Dinoflagellata;D_6__Incertae Sedis;D_7__Cochlodinium;Ambiguous_taxa	Dinoflagellata	M	Jeong et al. (2004)	0	0	33	0	0	0	25	0		0	0	0	0	17	0	0	0	0	3	0	0	0	0	0
D_0__Eukaryota;D_1__SAR;D_2__Alveolata;D_3__Dinoflagellata;D_6__Incertae Sedis;D_7__Cochlodinium;D_8__uncultured eukaryote	Dinoflagellata	M	Jeong et al. (2004)	0	0	0	0	0	0	2	0		0	0	0	0	0	0	0	4	0	0	0	0	0	0	0
D_0__Eukaryota;D_1__SAR;D_2__Alveolata;D_3__Dinoflagellata;D_6__Kareniaceae;Ambiguous_taxa;Ambiguous_taxa	Dinoflagellata	u		6	84	36	0	16	0	16	0		39	96	0	58	12	46	26	100	83	42	23	0	121	26	18
D_0__Eukaryota;D_1__SAR;D_2__Alveolata;D_3__Dinoflagellata;D_6__Kareniaceae;D_7__Karlodinium;Ambiguous_taxa	Dinoflagellata	M	Adolf et al. (2006)	0	21	0	0	0	0	0	0		57	0	6	0	0	0	18	0	0	0	0	0	0	0	8
D_0__Eukaryota;D_1__SAR;D_2__Alveolata;D_3__Dinoflagellata;D_6__Kareniaceae;D_7__Karlodinium;D_8__uncultured eukaryote	Dinoflagellata	M	Adolf et al. (2006)	0	0	35	0	12	0	0	0		129	15	12	15	0	26	0	43	52	20	11	4	29	64	11
D_0__Eukaryota;D_1__SAR;D_2__Alveolata;D_3__Dinoflagellata;D_6__Kareniaceae;D_7__Karlodinium;D_8__uncultured marine alveolate	Dinoflagellata	M	Adolf et al. (2006)	162	20392	3922	61084	12823	40552	7898	1465		1635	2949	11145	1579	2426	1640	920	602	1038	2491	1665	37	174	1082	6785
D_0__Eukaryota;D_1__SAR;D_2__Alveolata;D_3__Dinoflagellata;D_6__Kareniaceae;D_7__Karlodinium;D_8__uncultured marine picoplankton	Dinoflagellata	M	Adolf et al. (2006)	35	278	213	248	297	35	361	86		1337	507	2718	968	603	604	278	369	305	413	308	0	104	706	368
D_0__Eukaryota;D_1__SAR;D_2__Alveolata;D_3__Dinoflagellata;D_6__Kareniaceae;D_7__Takayama;D_8__uncultured eukaryote	Dinoflagellata	M	Jeong et al. (2016)	0	0	3	0	0	0	0	0		0	4	0	0	0	0	0	0	8	5	0	0	0	0	0
D_0__Eukaryota;D_1__SAR;D_2__Alveolata;D_3__Dinoflagellata;D_6__Peridiniales;D_7__Balechina;Ambiguous_taxa	Dinoflagellata	H	Gómez et al. (2015)	13	0	0	0	0	0	0	0		0	0	0	0	0	0	0	0	0	0	0	0	0	0	0
D_0__Eukaryota;D_1__SAR;D_2__Alveolata;D_3__Dinoflagellata;D_6__Peridiniales;D_7__Heterocapsa;D_8__uncultured eukaryote	Dinoflagellata	M	Millette et al. (2017)	0	0	15	0	13	0	0	0		29	0	0	13	0	48	0	0	48	0	0	0	0	24	0
D_0__Eukaryota;D_1__SAR;D_2__Alveolata;D_3__Dinoflagellata;D_6__Peridiniales;D_7__Islandinium;Ambiguous_taxa	Dinoflagellata	A	Potvin et al. (2018)	0	14	15	0	5	0	0	0		0	63	0	0	0	0	0	38	13	0	11	0	7	2	24
D_0__Eukaryota;D_1__SAR;D_2__Alveolata;D_3__Dinoflagellata;D_6__Peridiniales;D_7__Peridinium;D_8__uncultured dinoflagellate	Dinoflagellata	u		0	3	0	0	0	0	0	0		0	5	0	0	0	0	0	0	0	0	0	0	0	0	0
D_0__Eukaryota;D_1__SAR;D_2__Alveolata;D_3__Dinoflagellata;D_6__Peridiniales;D_7__Peridinium;D_8__uncultured eukaryote	Dinoflagellata	u		0	0	12	0	0	0	0	0		0	0	0	0	17	0	0	0	6	0	0	0	0	0	9
D_0__Eukaryota;D_1__SAR;D_2__Alveolata;D_3__Dinoflagellata;D_6__Peridiniales;D_7__Protoperidinium;Ambiguous_taxa	Dinoflagellata	H	Schneider et al. (2020)	0	8	0	0	12	0	14	0		0	0	0	0	0	5	0	9	0	0	0	0	13	0	0
D_0__Eukaryota;D_1__SAR;D_2__Alveolata;D_3__Dinoflagellata;D_6__Peridiniales;D_7__Protoperidinium;D_8__Protoperidinium conicum	Dinoflagellata	H	Schneider et al. (2020)	0	2	0	0	0	0	0	0		0	0	0	0	0	0	0	0	0	0	0	0	0	0	0
D_0__Eukaryota;D_1__SAR;D_2__Alveolata;D_3__Dinoflagellata;D_6__Peridiniales;D_7__Protoperidinium;D_8__Protoperidinium elegans	Dinoflagellata	H	Schneider et al. (2020)	0	0	2	0	0	0	0	0		0	0	0	0	0	0	0	0	0	0	0	0	0	0	0
D_0__Eukaryota;D_1__SAR;D_2__Alveolata;D_3__Dinoflagellata;D_6__Peridiniales;D_7__Protoperidinium;D_8__Protoperidinium monovelum	Dinoflagellata	H	Schneider et al. (2020)	0	0	0	0	0	0	0	0		0	60	0	0	6	0	0	7	12	0	0	0	39	13	0
D_0__Eukaryota;D_1__SAR;D_2__Alveolata;D_3__Dinoflagellata;D_6__Peridiniales;D_7__Protoperidinium;D_8__uncultured alveolate	Dinoflagellata	H	Schneider et al. (2020)	0	0	0	0	19	0	0	0		0	0	0	0	3	0	0	0	0	6	0	0	0	0	0
D_0__Eukaryota;D_1__SAR;D_2__Alveolata;D_3__Dinoflagellata;D_6__Peridiniales;D_7__Protoperidinium;D_8__uncultured eukaryote	Dinoflagellata	H	Schneider et al. (2020)	0	0	4	3	16	0	0	0		0	0	0	0	10	0	0	0	0	0	0	0	0	0	0
D_0__Eukaryota;D_1__SAR;D_2__Alveolata;D_3__Dinoflagellata;D_6__Peridiniales;D_7__Scrippsiella lachrymosa	Dinoflagellata	A	Lee et al. (2018)	13292	7316	709	184	45	56	0	79		0	0	125	0	204	69	333	275	475	0	212	0	0	79	303
D_0__Eukaryota;D_1__SAR;D_2__Alveolata;D_3__Dinoflagellata;D_6__Suessiaceae;Ambiguous_taxa;Ambiguous_taxa	Dinoflagellata	u		0	0	0	0	0	0	0	0		0	17	0	0	0	0	0	0	6	0	0	0	12	0	0
D_0__Eukaryota;D_1__SAR;D_2__Alveolata;D_3__Dinoflagellata;D_6__Suessiaceae;D_7__Biecheleria;D_8__uncultured eukaryote	Dinoflagellata	M	Jeong et al. (2021)	0	44	0	30	32	0	50	0		78	874	41	74	54	16	0	116	159	46	0	13	0	65	47
D_0__Eukaryota;D_1__SAR;D_2__Alveolata;D_3__Dinoflagellata;D_6__Suessiaceae;D_7__Pelagodinium;Ambiguous_taxa	Dinoflagellata	A	Jeong et al. (2021)	130	235	125	870	151	217	345	134		368	68	411	44	41	18	42	35	132	52	105	0	28	75	142
D_0__Eukaryota;D_1__SAR;D_2__Alveolata;D_3__Dinoflagellata;D_6__Suessiaceae;D_7__uncultured;D_8__uncultured eukaryote	Dinoflagellata	u		0	0	0	0	0	0	0	0		0	0	0	0	0	14	0	0	0	0	0	0	0	0	83
D_0__Eukaryota;D_1__SAR;D_2__Alveolata;D_3__Dinoflagellata;D_6__Suessiaceae;__;__	Dinoflagellata	u		72	23	139	281	0	285	0	271		104	158	74	0	0	63	75	0	74	48	189	0	51	34	0
D_0__Eukaryota;D_1__SAR;D_2__Alveolata;D_3__Dinoflagellata;D_6__Thoracosphaeraceae;D_7__Oodinium;D_8__eukaryote clone OLI11027	Dinoflagellata	H	Brown (1934)	0	0	6	8	365	0	374	8		0	478	1556	20	0	60	8	312	0	18	43	0	0	12	0
D_0__Eukaryota;D_1__SAR;D_2__Alveolata;D_3__Dinoflagellata;D_6__Thoracosphaeraceae;D_7__Oodinium;D_8__uncultured eukaryote	Dinoflagellata	H	Brown (1934)	0	0	0	0	0	0	0	0		0	22	0	0	0	0	27	134	0	0	0	0	0	0	0
D_0__Eukaryota;D_1__SAR;D_2__Alveolata;D_3__Dinoflagellata;__;__;__	Dinoflagellata	u		5234	9564	6916	2292	3397	5618	7759	3603		4926	7327	8193	7683	6688	4472	3433	7305	3393	2681	2659	173	2204	2271	3917
D_0__Eukaryota;D_1__SAR;D_2__Alveolata;D_3__Protalveolata;D_4__Oxyrrhis;D_5__uncultured marine eukaryote;D_6__uncultured marine eukaryote	Dinoflagellata	H	Schneider et al. (2020)	0	5	0	0	0	0	0	0		0	0	0	0	0	146	8	15	26	0	11	0	0	6	0
D_0__Eukaryota;D_1__SAR;D_2__Alveolata;D_3__Protalveolata;D_4__Syndiniales;Ambiguous_taxa;Ambiguous_taxa	Syndiniales	H	Guillou et al. (2008)	0	7	56	0	115	0	24	0		8	0	33	0	0	0	0	14	8	0	0	0	4	0	14
D_0__Eukaryota;D_1__SAR;D_2__Alveolata;D_3__Protalveolata;D_4__Syndiniales;D_5__Amoebophrya;Ambiguous_taxa	Syndiniales	H	Guillou et al. (2008)	6	120	139	83	233	13	116	24		166	90	272	113	29	198	24	140	153	32	39	3	37	35	40
D_0__Eukaryota;D_1__SAR;D_2__Alveolata;D_3__Protalveolata;D_4__Syndiniales;D_5__Amoebophrya;D_6__Amoebophrya sp. ex Karlodinium micrum	Syndiniales	H	Guillou et al. (2008)	0	0	0	0	0	0	0	0		0	0	0	0	0	0	0	2	0	0	0	0	0	0	0
D_0__Eukaryota;D_1__SAR;D_2__Alveolata;D_3__Protalveolata;D_4__Syndiniales;D_5__Amoebophrya;D_6__eukaryote clone OLI11261	Syndiniales	H	Guillou et al. (2008)	0	0	0	0	0	0	6	0		7	0	4	0	0	0	0	0	0	0	0	0	0	2	0
D_0__Eukaryota;D_1__SAR;D_2__Alveolata;D_3__Protalveolata;D_4__Syndiniales;D_5__Amoebophrya;D_6__uncultured alveolate	Syndiniales	H	Guillou et al. (2008)	6	36	10	11	21	0	22	0		86	0	0	0	0	0	0	0	8	0	0	0	4	0	5
D_0__Eukaryota;D_1__SAR;D_2__Alveolata;D_3__Protalveolata;D_4__Syndiniales;D_5__Amoebophrya;D_6__uncultured eukaryote	Syndiniales	H	Guillou et al. (2008)	0	69	125	11	256	0	93	10		114	59	107	72	14	67	11	109	71	13	2	0	37	74	0
D_0__Eukaryota;D_1__SAR;D_2__Alveolata;D_3__Protalveolata;D_4__Syndiniales;D_5__Amoebophrya;D_6__uncultured marine alveolate	Syndiniales	H	Guillou et al. (2008)	0	55	103	52	178	0	120	0		110	28	124	55	7	16	0	21	20	13	0	0	5	40	13
D_0__Eukaryota;D_1__SAR;D_2__Alveolata;D_3__Protalveolata;D_4__Syndiniales;D_5__Amoebophrya;D_6__uncultured marine picoplankton	Syndiniales	H	Guillou et al. (2008)	0	0	0	0	0	0	0	0		0	0	0	0	9	0	5	0	24	0	0	0	21	0	0
D_0__Eukaryota;D_1__SAR;D_2__Alveolata;D_3__Protalveolata;D_4__Syndiniales;D_5__Amoebophrya;D_6__uncultured syndiniales	Syndiniales	H	Guillou et al. (2008)	0	0	5	0	0	0	13	0		16	7	2	16	0	11	0	19	24	0	0	0	2	19	14
D_0__Eukaryota;D_1__SAR;D_2__Alveolata;D_3__Protalveolata;D_4__Syndiniales;D_5__Amoebophrya;__	Syndiniales	H	Guillou et al. (2008)	73	296	190	23	406	0	131	63		151	34	70	60	33	169	25	84	84	3	24	0	20	34	24
D_0__Eukaryota;D_1__SAR;D_2__Alveolata;D_3__Protalveolata;D_4__Syndiniales;D_5__Duboscquella;Ambiguous_taxa	Syndiniales	H	Guillou et al. (2008)	13	0	0	6	0	0	0	27		26	0	0	0	0	0	0	0	0	0	0	0	0	0	0
D_0__Eukaryota;D_1__SAR;D_2__Alveolata;D_3__Protalveolata;D_4__Syndiniales;D_5__Duboscquella;D_6__uncultured eukaryote	Syndiniales	H	Guillou et al. (2008)	17	90	145	295	142	22	206	118		54	37	186	37	28	75	29	50	58	79	53	0	20	27	6
D_0__Eukaryota;D_1__SAR;D_2__Alveolata;D_3__Protalveolata;D_4__Syndiniales;D_5__Duboscquella;D_6__uncultured marine eukaryote	Syndiniales	H	Guillou et al. (2008)	0	0	0	0	0	0	0	38		32	0	0	0	0	5	0	0	0	0	6	0	3	0	0
D_0__Eukaryota;D_1__SAR;D_2__Alveolata;D_3__Protalveolata;D_4__Syndiniales;D_5__Duboscquella;__	Syndiniales	H	Guillou et al. (2008)	0	0	0	0	0	0	0	0		0	0	10	16	16	8	0	0	0	0	0	0	0	8	0
D_0__Eukaryota;D_1__SAR;D_2__Alveolata;D_3__Protalveolata;D_4__Syndiniales;D_5__Hematodinium;D_6__uncultured eukaryote	Syndiniales	H	Guillou et al. (2008)	0	0	0	0	0	0	0	11		0	0	0	0	0	0	0	0	0	0	0	0	0	0	0
D_0__Eukaryota;D_1__SAR;D_2__Alveolata;D_3__Protalveolata;D_4__Syndiniales;D_5__Syndiniales Group I;Ambiguous_taxa	Syndiniales	H	Guillou et al. (2008)	0	0	95	0	126	0	37	85		79	24	54	46	84	46	10	25	30	13	18	0	0	88	0
D_0__Eukaryota;D_1__SAR;D_2__Alveolata;D_3__Protalveolata;D_4__Syndiniales;D_5__Syndiniales Group I;D_6__Takayama cf. pulchellum	Syndiniales	H	Guillou et al. (2008)	0	0	0	0	11	0	0	2		0	0	0	0	0	0	0	0	0	0	0	0	0	0	0
D_0__Eukaryota;D_1__SAR;D_2__Alveolata;D_3__Protalveolata;D_4__Syndiniales;D_5__Syndiniales Group I;D_6__Uncultured marine alveolate Group I DH144-EKD3	Syndiniales	H	Guillou et al. (2008)	0	37	318	78	877	17	536	0		649	92	599	188	42	84	52	127	106	132	128	53	46	214	102
D_0__Eukaryota;D_1__SAR;D_2__Alveolata;D_3__Protalveolata;D_4__Syndiniales;D_5__Syndiniales Group I;D_6__Uncultured marine alveolate Group II DH145-EKD20	Syndiniales	H	Guillou et al. (2008)	0	36	183	0	83	0	50	15		138	49	3	35	4	75	9	113	82	19	0	0	60	51	4
D_0__Eukaryota;D_1__SAR;D_2__Alveolata;D_3__Protalveolata;D_4__Syndiniales;D_5__Syndiniales Group I;D_6__eukaryote clone OLI11038	Syndiniales	H	Guillou et al. (2008)	0	0	0	0	0	0	0	0		0	0	0	3	0	0	0	0	0	0	0	0	0	0	0
D_0__Eukaryota;D_1__SAR;D_2__Alveolata;D_3__Protalveolata;D_4__Syndiniales;D_5__Syndiniales Group I;D_6__uncultured Duboscquella	Syndiniales	H	Guillou et al. (2008)	0	0	0	0	0	0	0	0		0	0	0	0	0	0	3	0	0	0	0	0	0	0	0
D_0__Eukaryota;D_1__SAR;D_2__Alveolata;D_3__Protalveolata;D_4__Syndiniales;D_5__Syndiniales Group I;D_6__uncultured alveolate	Syndiniales	H	Guillou et al. (2008)	64	554	4404	1077	3958	986	4501	790		3639	931	7688	1962	2226	2006	1469	866	1196	3681	7089	81	251	1535	929
D_0__Eukaryota;D_1__SAR;D_2__Alveolata;D_3__Protalveolata;D_4__Syndiniales;D_5__Syndiniales Group I;D_6__uncultured ciliate	Syndiniales	H	Guillou et al. (2008)	0	0	0	0	0	0	0	14		0	0	0	0	0	7	0	0	0	0	0	0	0	0	0
D_0__Eukaryota;D_1__SAR;D_2__Alveolata;D_3__Protalveolata;D_4__Syndiniales;D_5__Syndiniales Group I;D_6__uncultured dinoflagellate	Syndiniales	H	Guillou et al. (2008)	3	0	128	0	157	4	62	21		40	4	121	19	10	60	18	8	10	0	12	0	3	10	0
D_0__Eukaryota;D_1__SAR;D_2__Alveolata;D_3__Protalveolata;D_4__Syndiniales;D_5__Syndiniales Group I;D_6__uncultured eukaryote	Syndiniales	H	Guillou et al. (2008)	3	3	109	16	156	0	81	150		351	107	44	108	79	222	16	152	184	98	64	2	60	201	11
D_0__Eukaryota;D_1__SAR;D_2__Alveolata;D_3__Protalveolata;D_4__Syndiniales;D_5__Syndiniales Group I;D_6__uncultured marine alveolate	Syndiniales	H	Guillou et al. (2008)	0	21	217	91	601	25	161	39		0	0	0	14	13	0	12	0	15	51	32	0	4	6	18
D_0__Eukaryota;D_1__SAR;D_2__Alveolata;D_3__Protalveolata;D_4__Syndiniales;D_5__Syndiniales Group I;D_6__uncultured marine dinoflagellate	Syndiniales	H	Guillou et al. (2008)	6	79	129	422	117	222	309	177		388	18	275	122	176	185	64	93	104	175	40	0	95	176	21
D_0__Eukaryota;D_1__SAR;D_2__Alveolata;D_3__Protalveolata;D_4__Syndiniales;D_5__Syndiniales Group I;D_6__uncultured marine eukaryote	Syndiniales	H	Guillou et al. (2008)	0	0	474	29	732	0	164	31		91	153	387	54	328	180	104	66	31	67	118	0	17	131	136
D_0__Eukaryota;D_1__SAR;D_2__Alveolata;D_3__Protalveolata;D_4__Syndiniales;D_5__Syndiniales Group I;D_6__uncultured marine plankton	Syndiniales	H	Guillou et al. (2008)	2	0	0	0	12	0	0	34		20	0	0	0	0	3	0	0	0	7	5	0	6	0	0
D_0__Eukaryota;D_1__SAR;D_2__Alveolata;D_3__Protalveolata;D_4__Syndiniales;D_5__Syndiniales Group I;D_6__uncultured syndiniales	Syndiniales	H	Guillou et al. (2008)	0	0	58	0	68	0	41	12		56	35	56	46	7	22	5	20	25	18	7	5	13	52	0
D_0__Eukaryota;D_1__SAR;D_2__Alveolata;D_3__Protalveolata;D_4__Syndiniales;D_5__Syndiniales Group I;__	Syndiniales	H	Guillou et al. (2008)	15	81	169	0	259	15	293	76		839	37	45	48	8	856	101	134	199	334	371	0	67	256	159
D_0__Eukaryota;D_1__SAR;D_2__Alveolata;D_3__Protalveolata;D_4__Syndiniales;D_5__Syndiniales Group II;Ambiguous_taxa	Syndiniales	H	Guillou et al. (2008)	41	516	504	191	1124	0	661	75		784	174	1045	277	40	95	73	95	140	185	138	7	45	245	17
D_0__Eukaryota;D_1__SAR;D_2__Alveolata;D_3__Protalveolata;D_4__Syndiniales;D_5__Syndiniales Group II;D_6__Pentapharsodinium tyrrhenicum	Syndiniales	H	Guillou et al. (2008)	0	0	17	0	70	0	5	0		0	0	0	0	0	0	0	0	0	0	0	0	0	0	0
D_0__Eukaryota;D_1__SAR;D_2__Alveolata;D_3__Protalveolata;D_4__Syndiniales;D_5__Syndiniales Group II;D_6__Uncultured marine alveolate Group II DH148-EKD14	Syndiniales	H	Guillou et al. (2008)	0	0	0	0	10	0	0	0		0	0	0	0	0	0	0	0	0	0	0	0	0	0	0
D_0__Eukaryota;D_1__SAR;D_2__Alveolata;D_3__Protalveolata;D_4__Syndiniales;D_5__Syndiniales Group II;D_6__eukaryote clone OLI11023	Syndiniales	H	Guillou et al. (2008)	0	12	94	27	361	0	64	108		487	31	226	49	0	127	0	29	38	31	43	0	21	160	36
D_0__Eukaryota;D_1__SAR;D_2__Alveolata;D_3__Protalveolata;D_4__Syndiniales;D_5__Syndiniales Group II;D_6__marine metagenome	Syndiniales	H	Guillou et al. (2008)	0	61	76	0	126	0	97	36		320	114	262	201	18	187	45	99	98	38	48	0	50	139	29
D_0__Eukaryota;D_1__SAR;D_2__Alveolata;D_3__Protalveolata;D_4__Syndiniales;D_5__Syndiniales Group II;D_6__uncultured Amoebophrya	Syndiniales	H	Guillou et al. (2008)	28	177	375	153	276	0	113	35		1738	9	31	64	16	116	27	39	30	180	26	4	16	260	6
D_0__Eukaryota;D_1__SAR;D_2__Alveolata;D_3__Protalveolata;D_4__Syndiniales;D_5__Syndiniales Group II;D_6__uncultured alveolate	Syndiniales	H	Guillou et al. (2008)	0	9	7	0	48	0	0	0		12	0	8	6	0	12	4	3	11	0	0	0	2	6	0
D_0__Eukaryota;D_1__SAR;D_2__Alveolata;D_3__Protalveolata;D_4__Syndiniales;D_5__Syndiniales Group II;D_6__uncultured dinoflagellate	Syndiniales	H	Guillou et al. (2008)	0	42	11	0	28	0	0	0		0	0	0	0	0	0	0	0	5	9	0	0	0	0	0
D_0__Eukaryota;D_1__SAR;D_2__Alveolata;D_3__Protalveolata;D_4__Syndiniales;D_5__Syndiniales Group II;D_6__uncultured eukaryote	Syndiniales	H	Guillou et al. (2008)	51	650	412	459	916	140	325	73		1316	121	390	154	61	193	39	65	95	95	66	6	42	225	75
D_0__Eukaryota;D_1__SAR;D_2__Alveolata;D_3__Protalveolata;D_4__Syndiniales;D_5__Syndiniales Group II;D_6__uncultured marine Syndiniales	Syndiniales	H	Guillou et al. (2008)	0	0	0	0	0	0	6	0		0	0	0	0	0	3	0	0	0	0	0	0	0	0	0
D_0__Eukaryota;D_1__SAR;D_2__Alveolata;D_3__Protalveolata;D_4__Syndiniales;D_5__Syndiniales Group II;D_6__uncultured marine alveolate	Syndiniales	H	Guillou et al. (2008)	70	293	737	81	735	0	348	45		286	15	42	53	5	20	0	6	17	24	20	0	0	62	30
D_0__Eukaryota;D_1__SAR;D_2__Alveolata;D_3__Protalveolata;D_4__Syndiniales;D_5__Syndiniales Group II;D_6__uncultured marine eukaryote	Syndiniales	H	Guillou et al. (2008)	16	201	62	50	168	59	17	48		9	0	11	0	5	7	0	13	8	0	4	0	0	0	0
D_0__Eukaryota;D_1__SAR;D_2__Alveolata;D_3__Protalveolata;D_4__Syndiniales;D_5__Syndiniales Group II;D_6__uncultured marine picoplankton	Syndiniales	H	Guillou et al. (2008)	0	6	17	0	16	0	7	0		11	0	0	4	0	3	0	0	0	0	0	0	0	3	0
D_0__Eukaryota;D_1__SAR;D_2__Alveolata;D_3__Protalveolata;D_4__Syndiniales;D_5__Syndiniales Group II;D_6__uncultured syndiniales	Syndiniales	H	Guillou et al. (2008)	9	106	624	67	1118	0	724	27		89	37	116	35	2	34	0	10	16	83	8	0	17	39	0
D_0__Eukaryota;D_1__SAR;D_2__Alveolata;D_3__Protalveolata;D_4__Syndiniales;D_5__Syndiniales Group II;__	Syndiniales	H	Guillou et al. (2008)	34	818	2184	266	3797	50	1545	106		6625	714	1601	795	271	882	167	648	686	284	298	83	461	1819	399
D_0__Eukaryota;D_1__SAR;D_2__Alveolata;D_3__Protalveolata;D_4__Syndiniales;D_5__Syndiniales Group III;Ambiguous_taxa	Syndiniales	H	Guillou et al. (2008)	12	269	400	27	134	0	299	78		1845	205	97	55	25	224	67	289	438	119	47	4	602	682	132
D_0__Eukaryota;D_1__SAR;D_2__Alveolata;D_3__Protalveolata;D_4__Syndiniales;D_5__Syndiniales Group III;D_6__uncultured eukaryote	Syndiniales	H	Guillou et al. (2008)	0	0	5	0	0	0	0	14		8	5	0	0	0	4	0	4	3	5	7	0	0	3	20
D_0__Eukaryota;D_1__SAR;D_2__Alveolata;D_3__Protalveolata;D_4__Syndiniales;D_5__Syndiniales Group III;__	Syndiniales	H	Guillou et al. (2008)	16	0	206	0	104	0	180	0		372	108	0	107	49	183	0	201	168	46	81	29	142	162	0
D_0__Eukaryota;D_1__SAR;D_2__Alveolata;D_3__Protalveolata;D_4__Syndiniales;D_5__Syndiniales Group V;D_6__uncultured dinoflagellate	Syndiniales	H	Guillou et al. (2008)	0	0	0	0	0	0	0	15		0	0	0	0	0	3	0	0	0	0	0	0	0	0	0
D_0__Eukaryota;D_1__SAR;D_2__Alveolata;D_3__Protalveolata;D_4__Syndiniales;D_5__Syndiniales Group V;D_6__uncultured eukaryote	Syndiniales	H	Guillou et al. (2008)	0	0	0	0	0	0	0	7		0	0	0	0	0	0	0	0	0	0	0	0	0	0	0
D_0__Eukaryota;D_1__SAR;D_2__Alveolata;D_3__Protalveolata;D_4__Syndiniales;D_5__Syndiniales Group V;D_6__uncultured syndiniales	Syndiniales	H	Guillou et al. (2008)	0	0	109	0	251	0	14	9		25	16	64	33	17	13	4	4	0	16	0	0	0	41	0
D_0__Eukaryota;D_1__SAR;D_2__Alveolata;D_3__Protalveolata;D_4__Syndiniales;D_5__Syndiniales Group V;__	Syndiniales	H	Guillou et al. (2008)	0	4	0	0	0	0	0	0		0	0	0	0	0	0	0	0	0	0	0	0	0	0	0
D_0__Eukaryota;D_1__SAR;D_2__Alveolata;D_3__Protalveolata;D_4__Syndiniales;D_5__Syndinium;Ambiguous_taxa	Syndiniales	H	Guillou et al. (2008)	0	0	0	0	0	0	0	17		0	0	0	0	0	0	0	0	0	0	0	0	0	0	0
D_0__Eukaryota;D_1__SAR;D_2__Alveolata;D_3__Protalveolata;D_4__Syndiniales;D_5__uncultured Duboscquella;D_6__uncultured Duboscquella	Syndiniales	H	Guillou et al. (2008)	0	0	0	0	0	0	0	3		0	0	0	0	0	59	0	37	21	0	0	0	0	3	0
D_0__Eukaryota;D_1__SAR;D_2__Alveolata;D_3__Protalveolata;D_4__Syndiniales;D_5__uncultured marine alveolate;D_6__uncultured marine alveolate	Syndiniales	H	Guillou et al. (2008)	0	0	0	0	0	0	0	0		0	0	0	0	5	3	0	0	0	14	0	0	0	0	0
D_0__Eukaryota;D_1__SAR;D_2__Alveolata;D_3__Protalveolata;D_4__Syndiniales;D_5__uncultured syndiniales;D_6__uncultured syndiniales	Syndiniales	H	Guillou et al. (2008)	0	0	125	0	226	0	64	0		0	0	0	0	9	0	0	0	0	0	0	0	0	0	0
D_0__Eukaryota;D_1__SAR;D_2__Alveolata;D_3__Protalveolata;D_4__Syndiniales;D_5__uncultured;Ambiguous_taxa	Syndiniales	H	Guillou et al. (2008)	0	0	0	0	0	0	0	0		14	10	0	6	0	3	0	2	0	0	0	0	0	10	0
D_0__Eukaryota;D_1__SAR;D_2__Alveolata;D_3__Protalveolata;D_4__Syndiniales;D_5__uncultured;D_6__uncultured eukaryote	Syndiniales	H	Guillou et al. (2008)	0	5	36	0	72	0	0	0		13	0	0	0	0	0	0	0	0	0	0	0	3	0	4
D_0__Eukaryota;D_1__SAR;D_2__Alveolata;D_3__Protalveolata;D_4__Syndiniales;D_5__uncultured;D_6__uncultured marine alveolate	Syndiniales	H	Guillou et al. (2008)	0	0	20	0	34	0	0	0		47	0	0	33	0	21	0	0	0	0	0	0	0	25	0
D_0__Eukaryota;D_1__SAR;D_2__Alveolata;D_3__Protalveolata;D_4__Syndiniales;D_5__uncultured;D_6__uncultured marine eukaryote	Syndiniales	H	Guillou et al. (2008)	0	0	0	0	0	0	0	0		0	0	0	0	4	0	0	0	0	0	0	0	0	0	0
D_0__Eukaryota;D_1__SAR;D_2__Alveolata;D_3__Protalveolata;D_4__Syndiniales;__;__	Syndiniales	H	Guillou et al. (2008)	5	33	35	9	181	0	11	25		93	0	23	3	14	36	0	22	14	0	0	0	0	2	0
D_0__Eukaryota;D_1__SAR;D_2__Alveolata;D_3__Protalveolata;D_5__Ellobiopsidae;D_6__Ellobiopsis;D_7__uncultured eukaryote	Syndiniales	H	Guillou et al. (2008)	2	0	0	0	10	0	0	0		0	0	0	0	0	4	0	0	10	0	0	4	0	0	0
D_0__Eukaryota;D_1__SAR;D_2__Alveolata;D_3__Protalveolata;D_5__Ellobiopsidae;D_6__Ellobiopsis;__	Syndiniales	H	Guillou et al. (2008)	0	0	0	0	3	0	0	0		0	0	9	0	0	0	0	0	0	0	0	0	0	0	0
D_0__Eukaryota;D_1__SAR;D_2__Rhizaria;D_3__Cercozoa;D_4__Chlorarachniophyta;D_5__Amorphochlora;D_6__Amorphochlora amoebiformis	Rhizaria	A	Suzuki et al. (2015)	0	0	0	0	0	0	0	0		11	0	0	0	0	0	0	0	0	0	0	0	25	3	0
D_0__Eukaryota;D_1__SAR;D_2__Rhizaria;D_3__Cercozoa;D_4__Chlorarachniophyta;D_5__Bigelowiella;Ambiguous_taxa	Rhizaria	M	You and Palenik (2021)	0	13	0	0	9	0	0	0		38	0	0	0	0	0	0	0	0	0	0	0	0	3	0
D_0__Eukaryota;D_1__SAR;D_2__Rhizaria;D_3__Cercozoa;D_4__Chlorarachniophyta;D_5__Minorisa;Ambiguous_taxa	Rhizaria	u		0	15	8	5	5	0	6	0		17	0	0	3	0	2	0	0	0	0	0	0	0	0	0
D_0__Eukaryota;D_1__SAR;D_2__Rhizaria;D_3__Cercozoa;D_4__Chlorarachniophyta;D_5__NOR26;Ambiguous_taxa	Rhizaria	u		0	0	0	0	0	0	0	0		26	0	0	0	0	0	4	5	0	0	0	0	3	5	0
D_0__Eukaryota;D_1__SAR;D_2__Rhizaria;D_3__Cercozoa;D_4__Chlorarachniophyta;D_5__NOR26;D_6__uncultured eukaryote	Rhizaria	u		0	0	0	0	5	0	0	0		0	0	4	0	0	0	0	0	0	0	0	0	0	0	0
D_0__Eukaryota;D_1__SAR;D_2__Rhizaria;D_3__Cercozoa;D_4__Chlorarachniophyta;D_5__NOR26;D_6__uncultured marine eukaryote	Rhizaria	u		0	0	0	0	0	0	0	0		0	0	0	0	0	0	0	0	0	3	0	0	0	0	0
D_0__Eukaryota;D_1__SAR;D_2__Rhizaria;D_3__Cercozoa;D_4__Chlorarachniophyta;D_5__uncultured;D_6__uncultured marine eukaryote	Rhizaria	u		5	103	4	0	0	0	4	0		101	0	3	0	0	0	0	28	33	0	4	0	346	19	8
D_0__Eukaryota;D_1__SAR;D_2__Rhizaria;D_3__Cercozoa;D_4__Chlorarachniophyta;__;__	Rhizaria	u		0	29	0	0	0	0	0	0		10	0	0	0	0	0	0	0	0	0	0	0	0	0	0
D_0__Eukaryota;D_1__SAR;D_2__Rhizaria;D_3__Cercozoa;D_4__Granofilosea;D_5__Massisteria;Ambiguous_taxa	Rhizaria	H	De vargas et al. (2015)	0	0	0	0	0	0	0	0		0	0	0	0	0	0	0	6	19	0	0	0	8	0	3
D_0__Eukaryota;D_1__SAR;D_2__Rhizaria;D_3__Cercozoa;D_4__Imbricatea;D_5__Marimonadida;D_6__uncultured eukaryote	Rhizaria	H	De vargas et al. (2015)	0	0	0	0	11	0	0	2		0	0	0	0	0	0	0	0	0	0	0	0	0	0	13
D_0__Eukaryota;D_1__SAR;D_2__Rhizaria;D_3__Cercozoa;D_4__Novel Clade 2;Ambiguous_taxa;Ambiguous_taxa	Rhizaria	H	De vargas et al. (2015)	0	17	0	0	18	0	0	0		20	0	0	0	0	0	0	0	0	0	0	0	10	3	3
D_0__Eukaryota;D_1__SAR;D_2__Rhizaria;D_3__Cercozoa;D_4__Novel Clade 2;D_5__Uncultured Cercozoa;D_6__Uncultured Cercozoa	Rhizaria	H	De vargas et al. (2015)	0	202	7	8	57	14	8	7		20	0	0	0	0	0	0	26	7	0	0	0	53	5	50
D_0__Eukaryota;D_1__SAR;D_2__Rhizaria;D_3__Cercozoa;D_4__Novel Clade 2;D_5__uncultured Rhizaria;D_6__uncultured Rhizaria	Rhizaria	H	De vargas et al. (2015)	0	0	0	0	0	0	0	0		0	0	0	0	0	0	0	28	7	0	0	0	5	0	11
D_0__Eukaryota;D_1__SAR;D_2__Rhizaria;D_3__Cercozoa;D_4__Novel Clade 2;D_5__uncultured eukaryote;D_6__uncultured eukaryote	Rhizaria	H	De vargas et al. (2015)	2	23	7	0	10	0	4	5		85	5	5	11	6	0	2	0	0	0	0	0	4	9	0
D_0__Eukaryota;D_1__SAR;D_2__Rhizaria;D_3__Cercozoa;D_4__Novel Clade 2;D_5__uncultured marine eukaryote;D_6__uncultured marine eukaryote	Rhizaria	H	De vargas et al. (2015)	0	0	0	0	0	0	0	0		0	0	8	0	0	0	0	0	0	0	0	0	0	0	0
D_0__Eukaryota;D_1__SAR;D_2__Rhizaria;D_3__Cercozoa;D_4__Novel Clade 2;__;__	Rhizaria	H	De vargas et al. (2015)	0	0	0	0	0	0	0	0		15	0	0	0	0	0	0	0	7	0	0	0	0	0	0
D_0__Eukaryota;D_1__SAR;D_2__Rhizaria;D_3__Cercozoa;D_4__Phytomyxea;D_5__uncultured eukaryote;D_6__uncultured eukaryote	Rhizaria	H	De vargas et al. (2015)	3	0	0	0	0	0	0	0		0	0	0	0	0	0	0	0	0	0	0	0	0	0	0
D_0__Eukaryota;D_1__SAR;D_2__Rhizaria;D_3__Cercozoa;D_4__Thecofilosea;D_5__uncultured;Ambiguous_taxa	Rhizaria	H	De vargas et al. (2015)	0	132	13	25	38	26	0	0		94	0	0	0	0	0	0	5	0	0	0	0	0	10	78
D_0__Eukaryota;D_1__SAR;D_2__Rhizaria;D_3__Cercozoa;D_4__Thecofilosea;D_5__uncultured;D_6__Cercozoa sp. WHOI LI1-14	Rhizaria	H	De vargas et al. (2015)	0	0	12	0	3	0	3	0		0	0	0	0	0	0	0	0	0	0	0	0	0	0	18
D_0__Eukaryota;D_1__SAR;D_2__Rhizaria;D_3__Cercozoa;D_4__Thecofilosea;D_5__uncultured;D_6__Uncultured Cercozoa	Rhizaria	H	De vargas et al. (2015)	0	156	0	24	19	0	6	0		88	0	0	0	0	0	0	0	0	0	0	0	0	0	7
D_0__Eukaryota;D_1__SAR;D_2__Rhizaria;D_3__Cercozoa;D_4__Thecofilosea;D_5__uncultured;D_6__uncultured eukaryote	Rhizaria	H	De vargas et al. (2015)	0	0	0	0	0	0	0	0		0	0	0	0	0	0	0	0	0	0	0	0	0	0	0
D_0__Eukaryota;D_1__SAR;D_2__Rhizaria;D_3__Cercozoa;D_4__Thecofilosea;D_5__uncultured;__	Rhizaria	H	De vargas et al. (2015)	0	0	0	0	10	0	0	0		0	0	0	9	0	0	0	0	0	0	0	0	0	0	0
D_0__Eukaryota;D_1__SAR;D_2__Rhizaria;D_3__Cercozoa;D_4__Vampyrellidae;D_5__Leptophrys;Ambiguous_taxa	Rhizaria	H	De vargas et al. (2015)	0	0	0	0	0	0	0	0		0	0	0	0	0	0	0	2	0	0	0	0	0	0	0
D_0__Eukaryota;D_1__SAR;D_2__Rhizaria;D_3__Cercozoa;D_4__uncultured;Ambiguous_taxa;Ambiguous_taxa	Rhizaria	H	De vargas et al. (2015)	0	0	0	0	0	0	0	0		0	0	0	0	2	0	0	0	0	0	0	0	0	0	0
D_0__Eukaryota;D_1__SAR;D_2__Rhizaria;D_3__Cercozoa;D_4__uncultured;D_5__Uncultured Cercozoa;D_6__Uncultured Cercozoa	Rhizaria	H	De vargas et al. (2015)	0	0	0	0	0	0	0	0		4	0	0	0	0	0	0	0	0	0	0	0	0	0	0
D_0__Eukaryota;D_1__SAR;D_2__Rhizaria;D_3__Cercozoa;D_4__uncultured;__;__	Rhizaria	H	De vargas et al. (2015)	0	0	2	0	0	0	0	0		0	0	0	0	0	0	0	0	0	0	0	0	0	0	0
D_0__Eukaryota;D_1__SAR;D_2__Rhizaria;D_3__Cercozoa;D_5__Ebriacea;D_6__Ebria;Ambiguous_taxa	Rhizaria	H	De vargas et al. (2015)	5	0	0	9	0	7	0	15		33	171	8	0	0	0	14	29	21	0	16	0	108	18	54
D_0__Eukaryota;D_1__SAR;D_2__Rhizaria;D_3__Cercozoa;D_5__Ebriacea;D_6__Ebria;D_7__Uncultured Cercozoa	Rhizaria	H	De vargas et al. (2015)	0	0	0	11	0	11	0	0		0	0	0	0	0	0	0	0	0	0	0	0	0	0	13
D_0__Eukaryota;D_1__SAR;D_2__Rhizaria;D_3__Cercozoa;D_5__Ebriacea;D_6__Ebria;D_7__uncultured Rhizaria	Rhizaria	H	De vargas et al. (2015)	0	0	0	0	0	0	0	0		0	4	0	0	0	0	0	0	0	0	0	0	0	0	0
D_0__Eukaryota;D_1__SAR;D_2__Rhizaria;D_3__Cercozoa;D_5__Ebriacea;D_6__Ebria;__	Rhizaria	H	De vargas et al. (2015)	9	66	12	287	24	87	25	17		88	0	0	0	0	0	2	10	14	0	11	0	150	23	2787
D_0__Eukaryota;D_1__SAR;D_2__Rhizaria;D_3__Cercozoa;D_5__Marimonadida;D_6__NAMAKO-15;D_7__uncultured eukaryote	Rhizaria	H	De vargas et al. (2015)	0	12	0	0	0	0	0	0		11	2	15	0	0	0	0	0	0	0	0	0	0	0	0
D_0__Eukaryota;D_1__SAR;D_2__Rhizaria;D_3__Cercozoa;D_5__Marimonadida;D_6__Pseudopirsonia;D_7__uncultured eukaryote	Rhizaria	H	De vargas et al. (2015)	0	0	0	0	0	0	0	0		3	0	0	0	0	0	0	4	0	0	0	0	3	0	0
D_0__Eukaryota;D_1__SAR;D_2__Rhizaria;D_3__Cercozoa;D_5__Marimonadida;D_6__Pseudopirsonia;__	Rhizaria	H	De vargas et al. (2015)	0	14	10	0	4	0	4	0		39	0	0	0	0	0	0	0	0	0	0	0	0	0	0
D_0__Eukaryota;D_1__SAR;D_2__Rhizaria;D_3__Cercozoa;D_6__Protaspidae;D_7__Cryothecomonas;Ambiguous_taxa	Rhizaria	H	De vargas et al. (2015)	0	147	147	150	26	99	0	7		123	43	2	0	0	0	0	14	16	0	0	0	34	29	83
D_0__Eukaryota;D_1__SAR;D_2__Rhizaria;D_3__Cercozoa;D_6__Protaspidae;D_7__Protaspis;Ambiguous_taxa	Rhizaria	H	De vargas et al. (2015)	21	105	9	26	15	7	10	69		0	13	0	0	0	0	0	0	0	10	0	0	0	0	0
D_0__Eukaryota;D_1__SAR;D_2__Rhizaria;D_3__Cercozoa;D_6__Protaspidae;D_7__Protaspis;D_8__Uncultured Cercozoa	Rhizaria	H	De vargas et al. (2015)	0	0	0	0	0	0	0	0		0	0	0	0	0	0	0	0	0	0	0	0	0	0	14
D_0__Eukaryota;D_1__SAR;D_2__Rhizaria;D_3__Cercozoa;D_6__Protaspidae;D_7__Protaspis;__	Rhizaria	H	De vargas et al. (2015)	0	0	0	0	0	0	0	0		7	0	0	0	0	0	8	0	0	0	0	0	0	0	0
D_0__Eukaryota;D_1__SAR;D_2__Rhizaria;D_3__Cercozoa;D_6__Protaspidae;__;__	Rhizaria	H	De vargas et al. (2015)	0	0	0	0	0	0	0	0		0	18	0	0	0	0	0	0	0	0	0	0	0	0	0
D_0__Eukaryota;D_1__SAR;D_2__Rhizaria;D_3__Cercozoa;D_7__Peregriniidae;D_8__D2P04A09;Ambiguous_taxa	Rhizaria	H	De vargas et al. (2015)	0	0	0	0	0	0	0	0		0	0	0	0	5	0	0	0	0	0	0	0	0	0	0
D_0__Eukaryota;D_1__SAR;D_2__Rhizaria;D_3__Cercozoa;D_7__Thaumatomonadidae;D_8__uncultured;D_9__Cercozoa sp. CC-2009b	Rhizaria	H	De vargas et al. (2015)	0	47	10	46	0	0	0	3		28	0	0	0	0	0	0	5	34	4	0	0	4	7	101
D_0__Eukaryota;D_1__SAR;D_2__Rhizaria;D_3__Cercozoa;__;__;__	Rhizaria	H	De vargas et al. (2015)	0	136	11	230	6	10	14	6		46	40	14	12	3	0	18	67	29	0	37	0	2	0	83
D_0__Eukaryota;D_1__SAR;D_2__Rhizaria;D_3__Retaria;D_4__Acantharia;D_5__Acantharea Group I;D_6__uncultured eukaryote	Rhizaria	H	De vargas et al. (2015)	0	0	11	3	26	0	21	0		10	20	10	0	0	7	0	13	4	4	0	0	0	0	0
D_0__Eukaryota;D_1__SAR;D_2__Rhizaria;D_3__Retaria;D_4__Acantharia;D_5__Acantharea Group I;__	Rhizaria	H	De vargas et al. (2015)	0	0	0	0	0	0	5	0		7	0	0	0	0	0	0	0	0	0	0	0	0	5	0
D_0__Eukaryota;D_1__SAR;D_2__Rhizaria;D_3__Retaria;D_4__Acantharia;D_5__Acantharea Group II;Ambiguous_taxa	Rhizaria	H	De vargas et al. (2015)	0	0	0	0	0	0	0	0		0	0	0	2	0	0	0	0	0	0	0	0	0	0	0
D_0__Eukaryota;D_1__SAR;D_2__Rhizaria;D_3__Retaria;D_4__Acantharia;D_5__Acantharea Group II;D_6__uncultured eukaryote	Rhizaria	H	De vargas et al. (2015)	0	0	0	0	6	0	0	0		0	0	0	0	0	0	0	0	0	0	0	0	0	0	0
D_0__Eukaryota;D_1__SAR;D_2__Rhizaria;D_3__Retaria;D_4__Acantharia;D_5__Acantharea Group VI;Ambiguous_taxa	Rhizaria	H	De vargas et al. (2015)	0	0	0	0	0	0	0	0		0	0	0	0	8	0	0	0	0	0	0	0	0	0	0
D_0__Eukaryota;D_1__SAR;D_2__Rhizaria;D_3__Retaria;D_4__Acantharia;D_5__Arthracanthida;Ambiguous_taxa	Rhizaria	H	De vargas et al. (2015)	0	0	0	0	30	0	0	0		0	0	15	9	44	15	0	0	0	0	0	0	0	0	0
D_0__Eukaryota;D_1__SAR;D_2__Rhizaria;D_3__Retaria;D_4__Acantharia;D_5__Arthracanthida;__	Rhizaria	H	De vargas et al. (2015)	0	39	76	6	9	10	8	16		14	65	113	161	74	104	28	343	40	21	26	9	0	19	0
D_0__Eukaryota;D_1__SAR;D_2__Rhizaria;D_3__Retaria;D_4__Acantharia;D_5__Chaunocanthida;Ambiguous_taxa	Rhizaria	H	De vargas et al. (2015)	0	0	15	0	74	0	13	24		0	0	4	3	0	0	7	0	0	0	4	0	0	0	0
D_0__Eukaryota;D_1__SAR;D_2__Rhizaria;D_3__Retaria;D_4__Acantharia;D_5__Holocanthida;D_6__uncultured eukaryote	Rhizaria	H	De vargas et al. (2015)	0	0	2	0	5	0	0	4		0	18	41	0	112	19	0	4	0	0	0	0	0	4	6
D_0__Eukaryota;D_1__SAR;D_2__Rhizaria;D_3__Retaria;D_4__Acantharia;D_5__uncultured;D_6__uncultured eukaryote	Rhizaria	H	De vargas et al. (2015)	0	0	3	0	23	0	13	0		0	7	0	15	25	3	5	4	0	6	0	0	0	0	0
D_0__Eukaryota;D_1__SAR;D_2__Rhizaria;D_3__Retaria;D_4__Polycystinea;D_5__Collodaria;Ambiguous_taxa	Rhizaria	H	De vargas et al. (2015)	0	0	0	2	0	0	0	0		0	0	11	0	0	0	0	0	0	0	0	719	0	0	0
D_0__Eukaryota;D_1__SAR;D_2__Rhizaria;D_3__Retaria;D_4__Polycystinea;D_5__Nassellaria;D_6__uncultured eukaryote	Rhizaria	H	De vargas et al. (2015)	0	0	0	0	4	0	0	0		0	0	0	0	0	0	0	0	0	0	0	0	0	0	0
D_0__Eukaryota;D_1__SAR;D_2__Rhizaria;D_3__Retaria;D_4__Polycystinea;D_5__Spumellaria;D_6__uncultured marine eukaryote	Rhizaria	H	De vargas et al. (2015)	0	0	26	0	146	0	0	2		0	0	0	0	0	0	0	0	0	0	0	0	0	0	0
D_0__Eukaryota;D_1__SAR;D_2__Rhizaria;D_3__Retaria;D_4__Polycystinea;D_5__Spumellaria;D_6__uncultured stramenopile	Rhizaria	H	De vargas et al. (2015)	0	0	0	0	0	0	0	0		0	0	0	0	0	0	2	0	0	0	0	0	0	0	0
D_0__Eukaryota;D_1__SAR;D_2__Rhizaria;D_3__Retaria;D_4__RAD A;Ambiguous_taxa;Ambiguous_taxa	Rhizaria	H	De vargas et al. (2015)	13	7	33	5	145	0	42	65		249	271	5938	1136	809	612	145	158	142	63	93	0	33	405	534
D_0__Eukaryota;D_1__SAR;D_2__Rhizaria;D_3__Retaria;D_4__RAD A;D_5__uncultured Rhizaria;D_6__uncultured Rhizaria	Rhizaria	H	De vargas et al. (2015)	0	0	256	0	295	0	47	7		7	0	87	4	6	0	0	0	0	3	7	0	0	0	8
D_0__Eukaryota;D_1__SAR;D_2__Rhizaria;D_3__Retaria;D_4__RAD A;D_5__uncultured eukaryote;D_6__uncultured eukaryote	Rhizaria	H	De vargas et al. (2015)	0	0	12	0	189	0	9	2		0	0	0	0	0	0	0	0	0	0	0	0	0	0	0
D_0__Eukaryota;D_1__SAR;D_2__Rhizaria;D_3__Retaria;D_4__RAD A;D_5__uncultured marine Polycystinea;D_6__uncultured marine Polycystinea	Rhizaria	H	De vargas et al. (2015)	0	0	15	0	318	0	119	0		0	0	5	0	47	2	0	0	0	0	0	0	23	4	0
D_0__Eukaryota;D_1__SAR;D_2__Rhizaria;D_3__Retaria;D_4__RAD A;D_5__uncultured marine eukaryote;D_6__uncultured marine eukaryote	Rhizaria	H	De vargas et al. (2015)	0	0	0	0	0	0	0	0		0	0	5	0	31	5	0	0	0	0	0	0	0	0	10
D_0__Eukaryota;D_1__SAR;D_2__Rhizaria;D_3__Retaria;D_4__RAD A;__;__	Rhizaria	H	De vargas et al. (2015)	0	0	36	0	63	0	11	2		14	33	233	25	4	0	0	0	0	16	0	0	0	0	14
D_0__Eukaryota;D_1__SAR;D_2__Rhizaria;D_3__Retaria;D_4__RAD B;Ambiguous_taxa;Ambiguous_taxa	Rhizaria	H	De vargas et al. (2015)	0	0	85	0	276	0	22	0		0	5	28	27	13	99	40	401	36	46	20	3	4	8	5
D_0__Eukaryota;D_1__SAR;D_2__Rhizaria;D_3__Retaria;D_4__RAD B;D_5__Sticholonche sp. JJP-2003;D_6__Sticholonche sp. JJP-2003	Rhizaria	H	De vargas et al. (2015)	0	0	0	0	0	0	0	2		0	0	0	0	0	0	0	0	0	0	0	0	0	0	0
D_0__Eukaryota;D_1__SAR;D_2__Rhizaria;D_3__Retaria;D_4__RAD B;D_5__hydrothermal vent metagenome;D_6__hydrothermal vent metagenome	Rhizaria	H	De vargas et al. (2015)	0	0	6	0	9	0	0	26		0	0	0	0	0	0	0	0	0	0	0	0	0	0	0
D_0__Eukaryota;D_1__SAR;D_2__Rhizaria;D_3__Retaria;D_4__RAD B;D_5__uncultured eukaryote;D_6__uncultured eukaryote	Rhizaria	H	De vargas et al. (2015)	0	0	12	0	27	0	0	0		0	0	0	0	0	0	0	0	0	0	0	0	0	0	0
D_0__Eukaryota;D_1__SAR;D_2__Rhizaria;D_3__Retaria;D_4__RAD B;D_5__uncultured marine Polycystinea;D_6__uncultured marine Polycystinea	Rhizaria	H	De vargas et al. (2015)	0	0	0	0	17	0	0	0		0	0	0	0	0	0	0	0	0	0	0	0	0	0	0
D_0__Eukaryota;D_1__SAR;D_2__Rhizaria;D_3__Retaria;D_4__RAD B;D_5__uncultured marine eukaryote;D_6__uncultured marine eukaryote	Rhizaria	H	De vargas et al. (2015)	0	0	0	0	13	0	0	0		0	0	0	0	0	0	0	0	0	0	0	0	0	0	0
D_0__Eukaryota;D_1__SAR;D_2__Rhizaria;D_3__Retaria;D_4__RAD B;__;__	Rhizaria	H	De vargas et al. (2015)	0	3	0	0	0	0	0	0		2	0	0	0	0	0	0	0	0	0	0	0	0	0	0
D_0__Eukaryota;D_1__SAR;D_2__Rhizaria;D_3__Retaria;D_4__RAD C;Ambiguous_taxa;Ambiguous_taxa	Rhizaria	H	De vargas et al. (2015)	0	0	4	0	26	0	0	9		0	0	0	0	0	0	0	0	0	0	0	0	0	0	0
D_0__Eukaryota;D_1__SAR;D_2__Rhizaria;D_3__Retaria;D_4__RAD C;D_5__uncultured eukaryote;D_6__uncultured eukaryote	Rhizaria	H	De vargas et al. (2015)	0	0	14	0	11	0	2	0		0	0	6	2	0	0	0	0	0	4	0	0	0	0	0
D_0__Eukaryota;D_1__SAR;D_2__Rhizaria;D_3__Retaria;D_5__Arthracanthida;Ambiguous_taxa;Ambiguous_taxa	Rhizaria	H	De vargas et al. (2015)	0	0	0	0	0	0	0	0		0	0	10	0	13	4	3	11	0	4	0	0	0	0	0
D_0__Eukaryota;D_1__SAR;D_2__Rhizaria;D_3__Retaria;D_5__Arthracanthida;__;__	Rhizaria	H	De vargas et al. (2015)	0	0	0	0	0	0	0	0		0	0	0	6	0	0	0	0	0	0	0	0	0	0	0
D_0__Eukaryota;D_1__SAR;D_2__Rhizaria;D_3__Retaria;D_5__Chaunocanthida;D_6__Amphiacon;D_7__Symphyacanthida sp. 211	Rhizaria	H	De vargas et al. (2015)	0	0	2	0	10	0	18	0		0	0	0	0	0	0	0	0	0	0	0	0	0	0	0
D_0__Eukaryota;D_1__SAR;D_2__Rhizaria;D_3__Retaria;D_5__Chaunocanthida;D_6__Amphiacon;__	Rhizaria	H	De vargas et al. (2015)	0	0	0	0	0	0	0	0		0	0	27	7	0	0	0	15	0	6	0	0	0	0	0
D_0__Eukaryota;D_1__SAR;D_2__Rhizaria;D_3__Retaria;D_5__Collodaria;Ambiguous_taxa;Ambiguous_taxa	Rhizaria	H	De vargas et al. (2015)	0	0	0	0	0	0	0	0		0	0	0	0	0	0	0	0	0	0	0	2	0	0	0
D_0__Eukaryota;D_1__SAR;D_2__Rhizaria;D_3__Retaria;D_5__Collodaria;D_6__AT8-54;Ambiguous_taxa	Rhizaria	H	De vargas et al. (2015)	0	30	43	0	0	0	14	32		653	0	17	2	14	37	803	6	14	0	13	120	34304	0	71
D_0__Eukaryota;D_1__SAR;D_2__Rhizaria;D_3__Retaria;D_5__Collodaria;D_6__Collosphaera;D_7__Acrosphaera sp. CR6A	Rhizaria	H	De vargas et al. (2015)	0	48	107	19	41	24	46	63		41	12	2386	0	76	134	35	16	20	0	34	158217	5	8	185
D_0__Eukaryota;D_1__SAR;D_2__Rhizaria;D_3__Retaria;D_5__Collodaria;D_6__Collosphaera;D_7__marine metagenome	Rhizaria	H	De vargas et al. (2015)	0	0	0	0	0	0	0	0		0	0	3	0	0	7	2	0	0	0	0	0	0	0	0
D_0__Eukaryota;D_1__SAR;D_2__Rhizaria;D_3__Retaria;D_5__Collodaria;D_6__Collozoum;D_7__Collozoum pelagicum	Rhizaria	H	De vargas et al. (2015)	0	0	0	0	4	0	0	0		0	0	0	0	0	0	0	0	0	0	0	33	0	0	0
D_0__Eukaryota;D_1__SAR;D_2__Rhizaria;D_3__Retaria;D_5__Nassellaria;D_6__Pseudocubus;Ambiguous_taxa	Rhizaria	H	De vargas et al. (2015)	0	0	0	0	9	0	0	0		0	0	0	0	0	0	0	0	0	0	0	0	0	0	0
D_0__Eukaryota;D_1__SAR;D_2__Rhizaria;D_3__Retaria;D_5__Nassellaria;D_6__Pseudocubus;D_7__uncultured eukaryote	Rhizaria	H	De vargas et al. (2015)	0	0	0	0	0	0	10	0		0	0	12	0	0	0	0	0	0	0	0	0	0	0	0
D_0__Eukaryota;D_1__SAR;D_2__Rhizaria;D_3__Retaria;D_5__Nassellaria;D_6__Pseudocubus;__	Rhizaria	H	De vargas et al. (2015)	0	0	0	0	17	0	0	0		0	0	14	0	0	2	0	8	0	0	0	0	0	0	0
D_0__Eukaryota;D_1__SAR;D_2__Rhizaria;D_3__Retaria;D_5__Spumellaria;Ambiguous_taxa;Ambiguous_taxa	Rhizaria	H	De vargas et al. (2015)	0	0	0	0	0	0	0	0		0	0	0	0	0	3	0	0	0	0	0	0	0	0	0
D_0__Eukaryota;D_1__SAR;D_2__Rhizaria;D_3__Retaria;D_5__Spumellaria;D_6__Astrosphaera;D_7__uncultured marine eukaryote	Rhizaria	H	De vargas et al. (2015)	0	0	2	0	0	0	0	0		0	0	0	0	0	0	0	0	0	0	0	0	0	0	0
D_0__Eukaryota;D_1__SAR;D_2__Rhizaria;D_3__Retaria;D_5__Spumellaria;D_6__Cladococcus;D_7__uncultured eukaryote	Rhizaria	H	De vargas et al. (2015)	0	0	22	0	0	0	0	0		0	7	0	0	0	0	0	0	6	0	0	0	0	0	0
D_0__Eukaryota;D_1__SAR;D_2__Rhizaria;D_3__Retaria;D_5__Spumellaria;D_6__Rhizosphaera;Ambiguous_taxa	Rhizaria	H	De vargas et al. (2015)	0	0	0	0	0	0	0	0		0	0	0	0	0	0	0	0	6	0	0	71	0	0	0
D_0__Eukaryota;D_1__SAR;D_2__Rhizaria;D_3__Retaria;D_5__Spumellaria;D_6__Rhizosphaera;D_7__uncultured eukaryote	Rhizaria	H	De vargas et al. (2015)	0	0	0	0	0	0	0	0		0	0	0	0	0	0	0	0	0	0	0	164	0	0	0
D_0__Eukaryota;D_1__SAR;D_2__Rhizaria;D_3__Retaria;D_5__Spumellaria;D_6__Rhizosphaera;__	Rhizaria	H	De vargas et al. (2015)	0	0	0	0	0	0	0	0		0	0	82	0	22	15	35	0	0	0	0	4070	0	0	15
D_0__Eukaryota;D_1__SAR;D_2__Rhizaria;D_3__Retaria;D_5__Spumellaria;D_6__Stylodictya;Ambiguous_taxa	Rhizaria	H	De vargas et al. (2015)	0	0	0	0	2	0	0	0		0	0	0	0	0	0	0	0	0	0	0	0	0	0	0
D_0__Eukaryota;D_1__SAR;D_2__Rhizaria;D_3__Retaria;D_5__Spumellaria;D_6__Triastrum;Ambiguous_taxa	Rhizaria	H	De vargas et al. (2015)	0	0	31	0	381	0	13	6		0	0	0	0	0	0	4	0	0	0	0	0	0	0	0
D_0__Eukaryota;D_1__SAR;D_2__Rhizaria;D_3__Retaria;D_5__Spumellaria;D_6__uncultured;Ambiguous_taxa	Rhizaria	H	De vargas et al. (2015)	7	13	134	0	568	5	17	13		0	0	0	0	161	316	18	786	211	13	330	0	0	19	0
D_0__Eukaryota;D_1__SAR;D_2__Rhizaria;D_3__Retaria;D_5__Spumellaria;D_6__uncultured;D_7__uncultured Rhizaria	Rhizaria	H	De vargas et al. (2015)	0	0	0	0	0	0	0	0		0	0	0	0	0	3	0	0	0	0	0	0	0	0	0
D_0__Eukaryota;D_1__SAR;D_2__Rhizaria;D_3__Retaria;D_5__Spumellaria;D_6__uncultured;__	Rhizaria	H	De vargas et al. (2015)	0	0	0	0	33	0	18	0		0	0	0	0	6	0	0	0	0	0	6	0	0	0	0
D_0__Eukaryota;D_1__SAR;D_2__Rhizaria;D_3__Retaria;D_5__Spumellaria;__;__	Rhizaria	H	De vargas et al. (2015)	0	6	0	0	50	0	0	20		0	17	0	0	0	0	0	17	0	0	0	0	0	0	7
D_0__Eukaryota;D_1__SAR;D_2__Rhizaria;D_3__Retaria;D_7__Rotaliidae;D_8__Ammonia;D_9__Ammonia sp. JP-2007	Rhizaria	H	De vargas et al. (2015)	0	0	0	0	0	0	0	0		0	0	6	0	0	0	0	0	0	0	0	0	0	0	0
D_0__Eukaryota;D_1__SAR;D_2__Rhizaria;D_3__Retaria;__;__;__	Rhizaria	H	De vargas et al. (2015)	0	0	0	0	5	0	0	0		0	0	0	0	0	0	0	0	0	0	3	0	0	0	0
D_0__Eukaryota;D_1__SAR;D_2__Stramenopiles;D_3__Bicosoecida;D_4__Bicosoeca;D_5__Bicosoeca vacillans;D_6__Bicosoeca vacillans	Stramenopiles	H	Obiol et al. (2021)	29	435	107	251	35	0	31	23		219	0	7	0	0	12	0	0	0	0	0	0	0	15	322
D_0__Eukaryota;D_1__SAR;D_2__Stramenopiles;D_3__Bicosoecida;D_4__Bicosoeca;D_5__Stramenopile sp. MESS21;D_6__Stramenopile sp. MESS21	Stramenopiles	H	Obiol et al. (2021)	0	0	0	0	0	0	0	0		0	0	0	0	0	0	0	0	0	0	0	0	29	0	0
D_0__Eukaryota;D_1__SAR;D_2__Stramenopiles;D_3__Bicosoecida;D_4__Bicosoeca;D_5__uncultured stramenopile;D_6__uncultured stramenopile	Stramenopiles	H	Obiol et al. (2021)	0	0	0	0	0	0	0	0		9	0	0	0	0	0	0	0	0	0	0	0	0	4	0
D_0__Eukaryota;D_1__SAR;D_2__Stramenopiles;D_3__Bicosoecida;D_4__Bicosoeca;__;__	Stramenopiles	H	Obiol et al. (2021)	0	0	0	0	0	0	0	0		9	0	0	0	0	0	0	0	0	0	0	0	0	0	0
D_0__Eukaryota;D_1__SAR;D_2__Stramenopiles;D_3__Bicosoecida;D_4__Caecitellus;Ambiguous_taxa;Ambiguous_taxa	Stramenopiles	H	Obiol et al. (2021)	0	0	0	0	0	0	0	0		0	0	0	0	0	0	0	0	6	0	0	0	12	0	0
D_0__Eukaryota;D_1__SAR;D_2__Stramenopiles;D_3__Bicosoecida;D_4__Caecitellus;D_5__Caecitellus parvulus;D_6__Caecitellus parvulus	Stramenopiles	H	Obiol et al. (2021)	0	0	0	0	0	0	0	0		0	0	0	0	0	6	0	0	0	0	0	0	0	0	0
D_0__Eukaryota;D_1__SAR;D_2__Stramenopiles;D_3__Bicosoecida;D_4__Caecitellus;D_5__uncultured eukaryote;D_6__uncultured eukaryote	Stramenopiles	H	Obiol et al. (2021)	0	0	0	0	2	0	0	0		0	0	0	0	0	0	6	0	0	0	0	0	0	0	0
D_0__Eukaryota;D_1__SAR;D_2__Stramenopiles;D_3__Bicosoecida;D_4__Pseudobodo;D_5__uncultured marine eukaryote;D_6__uncultured marine eukaryote	Stramenopiles	H	Obiol et al. (2021)	0	0	0	0	0	0	0	0		0	0	2	0	0	18	0	0	7	0	0	0	0	0	0
D_0__Eukaryota;D_1__SAR;D_2__Stramenopiles;D_3__Bicosoecida;D_4__Saccharina japonica;D_5__Saccharina japonica;D_6__Saccharina japonica	Stramenopiles	H	Obiol et al. (2021)	0	8	0	0	0	0	0	0		0	0	0	0	0	0	0	0	0	0	0	0	0	0	0
D_0__Eukaryota;D_1__SAR;D_2__Stramenopiles;D_3__Bicosoecida;__;__;__	Stramenopiles	H	Obiol et al. (2021)	0	0	0	0	0	0	0	0		0	0	0	0	0	4	0	0	19	0	0	0	23	0	0
D_0__Eukaryota;D_1__SAR;D_2__Stramenopiles;D_3__Incertae Sedis;D_4__Pirsonia;Ambiguous_taxa;Ambiguous_taxa	Stramenopiles	H	Kühn et al. (2004)	8	54	16	0	41	0	0	0		20	0	0	0	0	3	0	0	11	2	0	0	7	3	32
D_0__Eukaryota;D_1__SAR;D_2__Stramenopiles;D_3__Labyrinthulomycetes;Ambiguous_taxa;Ambiguous_taxa;Ambiguous_taxa	Stramenopiles	H	Ueda et al. (2015)	0	0	0	0	0	0	0	0		7	0	0	0	6	59	131	170	86	256	80	5	663	0	44
D_0__Eukaryota;D_1__SAR;D_2__Stramenopiles;D_3__Labyrinthulomycetes;D_4__Thraustochytriaceae;D_5__Aplanochytrium;Ambiguous_taxa	Stramenopiles	H	Ueda et al. (2015)	0	0	7	6	19	0	39	0		0	13	31	13	23	73	8	12	0	16	31	0	0	0	22
D_0__Eukaryota;D_1__SAR;D_2__Stramenopiles;D_3__Labyrinthulomycetes;D_4__Thraustochytriaceae;D_5__Aplanochytrium;__	Stramenopiles	H	Ueda et al. (2015)	0	0	34	0	0	0	0	0		0	0	52	22	0	21	12	0	16	0	0	0	0	0	0
D_0__Eukaryota;D_1__SAR;D_2__Stramenopiles;D_3__Labyrinthulomycetes;D_4__Thraustochytriaceae;D_5__uncultured;D_6__Thraustochytriidae sp. NK58	Stramenopiles	H	Ueda et al. (2015)	0	4	0	0	0	0	0	0		0	0	0	0	0	0	0	0	9	0	0	2	7	0	0
D_0__Eukaryota;D_1__SAR;D_2__Stramenopiles;D_3__Labyrinthulomycetes;D_4__Thraustochytriaceae;D_5__uncultured;D_6__uncultured eukaryote	Stramenopiles	H	Ueda et al. (2015)	15	61	25	56	17	32	18	14		0	0	30	3	7	11	0	0	0	6	0	0	0	0	0
D_0__Eukaryota;D_1__SAR;D_2__Stramenopiles;D_3__Labyrinthulomycetes;D_4__Thraustochytriaceae;D_5__uncultured;D_6__uncultured labyrinthulid	Stramenopiles	H	Ueda et al. (2015)	5	0	0	6	0	0	0	0		3	0	0	0	0	0	0	0	12	0	3	0	7	0	9
D_0__Eukaryota;D_1__SAR;D_2__Stramenopiles;D_3__Labyrinthulomycetes;D_4__Thraustochytriaceae;D_5__uncultured;__	Stramenopiles	H	Ueda et al. (2015)	0	0	0	0	0	0	0	0		0	0	0	0	0	0	0	0	0	0	0	0	0	0	0
D_0__Eukaryota;D_1__SAR;D_2__Stramenopiles;D_3__Labyrinthulomycetes;D_4__Thraustochytriaceae;__;__	Stramenopiles	H	Ueda et al. (2015)	0	0	0	0	0	0	0	0		14	0	38	0	0	6	0	3	0	0	5	0	0	0	0
D_0__Eukaryota;D_1__SAR;D_2__Stramenopiles;D_3__Labyrinthulomycetes;D_4__uncultured;Ambiguous_taxa;Ambiguous_taxa	Stramenopiles	H	Ueda et al. (2015)	0	0	5	0	0	0	0	0		0	0	0	0	0	0	0	0	0	0	0	0	0	0	0
D_0__Eukaryota;D_1__SAR;D_2__Stramenopiles;D_3__Labyrinthulomycetes;D_4__uncultured;D_5__uncultured eukaryote;D_6__uncultured eukaryote	Stramenopiles	H	Ueda et al. (2015)	0	68	11	10	44	0	19	5		133	7	47	13	3	15	0	51	21	7	6	0	10	59	31
D_0__Eukaryota;D_1__SAR;D_2__Stramenopiles;D_3__Labyrinthulomycetes;D_4__uncultured;D_5__uncultured marine eukaryote;D_6__uncultured marine eukaryote	Stramenopiles	H	Ueda et al. (2015)	0	0	43	5	97	0	27	0		19	0	4	0	0	0	0	0	5	0	0	0	0	0	0
D_0__Eukaryota;D_1__SAR;D_2__Stramenopiles;D_3__Labyrinthulomycetes;D_4__uncultured;D_5__uncultured stramenopile;D_6__uncultured stramenopile	Stramenopiles	H	Ueda et al. (2015)	0	13	0	0	7	0	0	0		22	0	4	2	0	0	0	15	0	0	0	0	7	0	0
D_0__Eukaryota;D_1__SAR;D_2__Stramenopiles;D_3__Labyrinthulomycetes;D_4__uncultured;__;__	Stramenopiles	H	Ueda et al. (2015)	0	0	0	0	3	0	0	0		0	0	0	0	0	0	0	0	0	0	0	0	0	0	0
D_0__Eukaryota;D_1__SAR;D_2__Stramenopiles;D_3__MAST-11;Ambiguous_taxa;Ambiguous_taxa;Ambiguous_taxa	Stramenopiles	H	Sommeria-Klein et al. (2021)	0	32	54	7	59	0	18	0		56	0	9	14	5	34	3	29	78	8	12	0	106	0	25
D_0__Eukaryota;D_1__SAR;D_2__Stramenopiles;D_3__MAST-12;D_4__MAST-12A;Ambiguous_taxa;Ambiguous_taxa	Stramenopiles	H	Sommeria-Klein et al. (2021)	0	0	0	0	0	0	0	0		0	0	0	0	0	0	0	0	0	0	0	0	11	0	0
D_0__Eukaryota;D_1__SAR;D_2__Stramenopiles;D_3__MAST-12;D_4__MAST-12A;D_5__uncultured eukaryote;D_6__uncultured eukaryote	Stramenopiles	H	Sommeria-Klein et al. (2021)	0	2	5	0	0	0	0	0		12	48	0	0	0	0	0	0	7	0	0	0	0	0	0
D_0__Eukaryota;D_1__SAR;D_2__Stramenopiles;D_3__MAST-12;D_4__MAST-12A;D_5__uncultured stramenopile;D_6__uncultured stramenopile	Stramenopiles	H	Sommeria-Klein et al. (2021)	0	0	0	0	0	0	0	6		0	0	0	0	0	0	0	0	0	0	0	0	0	0	0
D_0__Eukaryota;D_1__SAR;D_2__Stramenopiles;D_3__MAST-12;D_4__MAST-12B;D_5__uncultured marine picoeukaryote;D_6__uncultured marine picoeukaryote	Stramenopiles	H	Sommeria-Klein et al. (2021)	0	10	0	0	0	0	0	0		0	2	0	0	0	0	0	0	0	0	0	0	5	5	15
D_0__Eukaryota;D_1__SAR;D_2__Stramenopiles;D_3__MAST-12;D_4__MAST-12B;D_5__uncultured phytoplankton;D_6__uncultured phytoplankton	Stramenopiles	H	Sommeria-Klein et al. (2021)	0	0	4	0	0	0	0	0		0	0	0	0	0	0	0	0	0	0	0	0	0	0	0
D_0__Eukaryota;D_1__SAR;D_2__Stramenopiles;D_3__MAST-12;D_4__uncultured eukaryote;D_5__uncultured eukaryote;D_6__uncultured eukaryote	Stramenopiles	H	Sommeria-Klein et al. (2021)	0	7	0	0	0	0	0	0		0	9	0	0	0	0	0	0	0	0	0	0	11	2	0
D_0__Eukaryota;D_1__SAR;D_2__Stramenopiles;D_3__MAST-1;Ambiguous_taxa;Ambiguous_taxa;Ambiguous_taxa	Stramenopiles	H	Sommeria-Klein et al. (2021)	0	0	20	0	47	0	20	0		7	0	7	0	0	0	0	11	18	0	0	0	0	12	9
D_0__Eukaryota;D_1__SAR;D_2__Stramenopiles;D_3__MAST-1;D_4__MAST-1A;Ambiguous_taxa;Ambiguous_taxa	Stramenopiles	H	Sommeria-Klein et al. (2021)	0	0	13	0	22	0	0	14		14	17	0	0	0	5	0	0	0	0	0	0	0	10	0
D_0__Eukaryota;D_1__SAR;D_2__Stramenopiles;D_3__MAST-1;D_4__MAST-1A;D_5__eukaryote clone OLI11026;D_6__eukaryote clone OLI11026	Stramenopiles	H	Sommeria-Klein et al. (2021)	0	0	5	0	0	0	0	0		0	0	0	0	0	0	0	0	0	0	0	0	0	0	0
D_0__Eukaryota;D_1__SAR;D_2__Stramenopiles;D_3__MAST-1;D_4__MAST-1B;Ambiguous_taxa;Ambiguous_taxa	Stramenopiles	H	Sommeria-Klein et al. (2021)	3	15	50	6	42	0	21	29		37	4	0	0	0	13	0	28	83	10	18	0	47	5	26
D_0__Eukaryota;D_1__SAR;D_2__Stramenopiles;D_3__MAST-1;D_4__MAST-1C;Ambiguous_taxa;Ambiguous_taxa	Stramenopiles	H	Sommeria-Klein et al. (2021)	8	295	137	202	132	74	128	65		300	86	69	23	7	31	30	50	59	31	11	0	11	63	0
D_0__Eukaryota;D_1__SAR;D_2__Stramenopiles;D_3__MAST-1;D_4__uncultured eukaryote;D_5__uncultured eukaryote;D_6__uncultured eukaryote	Stramenopiles	H	Sommeria-Klein et al. (2021)	0	0	0	0	0	0	2	0		0	0	0	0	0	0	0	0	0	5	0	0	0	0	11
D_0__Eukaryota;D_1__SAR;D_2__Stramenopiles;D_3__MAST-2;Ambiguous_taxa;Ambiguous_taxa;Ambiguous_taxa	Stramenopiles	u		0	53	19	0	0	0	10	11		102	0	0	0	0	0	0	0	3	0	0	0	0	0	17
D_0__Eukaryota;D_1__SAR;D_2__Stramenopiles;D_3__MAST-2;D_4__uncultured eukaryote;D_5__uncultured eukaryote;D_6__uncultured eukaryote	Stramenopiles	u		0	83	0	0	18	0	0	0		23	3	0	0	0	0	0	0	0	0	0	0	0	10	6
D_0__Eukaryota;D_1__SAR;D_2__Stramenopiles;D_3__MAST-3;D_4__MAST-3B;D_5__uncultured eukaryote;D_6__uncultured eukaryote	Stramenopiles	H	Sommeria-Klein et al. (2021)	0	0	0	0	5	0	0	0		0	0	8	0	0	0	0	0	0	0	0	0	0	0	0
D_0__Eukaryota;D_1__SAR;D_2__Stramenopiles;D_3__MAST-3;D_4__MAST-3C;Ambiguous_taxa;Ambiguous_taxa	Stramenopiles	H	Sommeria-Klein et al. (2021)	0	0	0	0	0	0	0	0		0	0	0	0	0	6	0	0	7	0	0	0	0	0	0
D_0__Eukaryota;D_1__SAR;D_2__Stramenopiles;D_3__MAST-3;D_4__MAST-3C;D_5__uncultured eukaryote;D_6__uncultured eukaryote	Stramenopiles	H	Sommeria-Klein et al. (2021)	0	0	0	0	5	0	0	0		0	0	0	0	0	0	0	0	0	0	0	0	0	0	0
D_0__Eukaryota;D_1__SAR;D_2__Stramenopiles;D_3__MAST-3;D_4__MAST-3D;Ambiguous_taxa;Ambiguous_taxa	Stramenopiles	H	Sommeria-Klein et al. (2021)	0	18	0	10	26	0	17	0		45	18	17	4	0	14	0	6	0	15	0	3	0	9	0
D_0__Eukaryota;D_1__SAR;D_2__Stramenopiles;D_3__MAST-3;D_4__MAST-3E;Ambiguous_taxa;Ambiguous_taxa	Stramenopiles	H	Sommeria-Klein et al. (2021)	0	0	0	0	63	0	0	0		0	4	0	0	0	0	9	20	0	0	16	0	44	9	0
D_0__Eukaryota;D_1__SAR;D_2__Stramenopiles;D_3__MAST-3;D_4__MAST-3F;Ambiguous_taxa;Ambiguous_taxa	Stramenopiles	H	Sommeria-Klein et al. (2021)	0	0	22	0	92	0	16	0		20	0	16	0	0	12	4	19	14	0	0	0	16	0	0
D_0__Eukaryota;D_1__SAR;D_2__Stramenopiles;D_3__MAST-3;D_4__MAST-3F;D_5__uncultured stramenopile;D_6__uncultured stramenopile	Stramenopiles	H	Sommeria-Klein et al. (2021)	0	0	0	0	0	0	0	7		11	7	37	11	0	12	6	17	22	0	7	0	5	2	0
D_0__Eukaryota;D_1__SAR;D_2__Stramenopiles;D_3__MAST-3;D_4__MAST-3G;D_5__uncultured eukaryote;D_6__uncultured eukaryote	Stramenopiles	H	Sommeria-Klein et al. (2021)	0	0	0	0	5	0	0	0		0	0	0	0	0	0	0	0	0	0	0	0	0	0	0
D_0__Eukaryota;D_1__SAR;D_2__Stramenopiles;D_3__MAST-3;D_4__MAST-3I;Ambiguous_taxa;Ambiguous_taxa	Stramenopiles	H	Sommeria-Klein et al. (2021)	0	87	78	2	30	0	7	6		94	0	5	0	0	4	0	8	0	0	0	0	2	19	19
D_0__Eukaryota;D_1__SAR;D_2__Stramenopiles;D_3__MAST-3;D_4__MAST-3I;D_5__uncultured stramenopile;D_6__uncultured stramenopile	Stramenopiles	H	Sommeria-Klein et al. (2021)	6	0	0	0	0	0	0	13		27	0	0	0	0	10	0	0	0	0	0	0	0	0	12
D_0__Eukaryota;D_1__SAR;D_2__Stramenopiles;D_3__MAST-3;D_4__MAST-3I;__;__	Stramenopiles	H	Sommeria-Klein et al. (2021)	0	0	49	6	26	0	28	5		29	10	22	16	9	35	5	51	14	116	37	0	8	12	0
D_0__Eukaryota;D_1__SAR;D_2__Stramenopiles;D_3__MAST-3;D_4__MAST-3J;D_5__eukaryote marine clone ME1-18;D_6__eukaryote marine clone ME1-18	Stramenopiles	H	Sommeria-Klein et al. (2021)	0	23	26	8	8	0	0	0		36	0	3	0	0	0	0	0	0	0	0	0	0	0	8
D_0__Eukaryota;D_1__SAR;D_2__Stramenopiles;D_3__MAST-3;D_4__MAST-3J;D_5__uncultured eukaryote;D_6__uncultured eukaryote	Stramenopiles	H	Sommeria-Klein et al. (2021)	4	56	34	47	36	0	9	10		41	0	0	0	0	8	0	3	0	0	5	0	25	20	53
D_0__Eukaryota;D_1__SAR;D_2__Stramenopiles;D_3__MAST-3;D_4__MAST-3J;D_5__uncultured marine eukaryote;D_6__uncultured marine eukaryote	Stramenopiles	H	Sommeria-Klein et al. (2021)	3	49	15	0	0	0	0	0		17	0	0	0	0	0	0	5	9	9	0	0	7	0	30
D_0__Eukaryota;D_1__SAR;D_2__Stramenopiles;D_3__MAST-3;D_4__MAST-3K;Ambiguous_taxa;Ambiguous_taxa	Stramenopiles	H	Sommeria-Klein et al. (2021)	0	31	13	12	18	0	7	0		20	0	10	0	0	2	0	0	9	3	6	0	26	4	0
D_0__Eukaryota;D_1__SAR;D_2__Stramenopiles;D_3__MAST-3;D_4__MAST-3K;D_5__uncultured stramenopile;D_6__uncultured stramenopile	Stramenopiles	H	Sommeria-Klein et al. (2021)	0	0	0	0	20	0	0	0		0	0	0	0	0	0	0	0	0	0	0	0	0	0	0
D_0__Eukaryota;D_1__SAR;D_2__Stramenopiles;D_3__MAST-3;D_4__MAST-3L;D_5__uncultured stramenopile;D_6__uncultured stramenopile	Stramenopiles	H	Sommeria-Klein et al. (2021)	0	0	0	0	0	0	0	0		0	0	0	0	0	0	0	0	4	0	0	0	0	0	0
D_0__Eukaryota;D_1__SAR;D_2__Stramenopiles;D_3__MAST-3;D_4__uncultured eukaryote;D_5__uncultured eukaryote;D_6__uncultured eukaryote	Stramenopiles	H	Sommeria-Klein et al. (2021)	12	59	26	11	0	0	3	0		18	0	0	0	0	5	0	0	0	0	2	0	15	9	0
D_0__Eukaryota;D_1__SAR;D_2__Stramenopiles;D_3__MAST-3;D_4__uncultured marine stramenopile;D_5__uncultured marine stramenopile;D_6__uncultured marine stramenopile	Stramenopiles	H	Sommeria-Klein et al. (2021)	0	19	17	0	0	0	51	0		38	0	28	0	0	0	0	0	0	35	0	0	0	23	0
D_0__Eukaryota;D_1__SAR;D_2__Stramenopiles;D_3__MAST-3;D_4__uncultured stramenopile;D_5__uncultured stramenopile;D_6__uncultured stramenopile	Stramenopiles	H	Sommeria-Klein et al. (2021)	0	0	0	0	0	0	0	0		0	0	8	5	0	0	0	9	0	0	0	0	0	0	0
D_0__Eukaryota;D_1__SAR;D_2__Stramenopiles;D_3__MAST-3;__;__;__	Stramenopiles	H	Sommeria-Klein et al. (2021)	0	172	140	21	141	8	127	24		268	6	61	20	0	38	0	37	47	26	0	5	37	45	0
D_0__Eukaryota;D_1__SAR;D_2__Stramenopiles;D_3__MAST-4;Ambiguous_taxa;Ambiguous_taxa;Ambiguous_taxa	Stramenopiles	H	Sommeria-Klein et al. (2021)	11	258	179	17	361	0	94	48		419	12	29	8	5	58	28	75	194	27	35	9	229	100	294
D_0__Eukaryota;D_1__SAR;D_2__Stramenopiles;D_3__MAST-4;D_4__MAST-4A;D_5__uncultured stramenopile;D_6__uncultured stramenopile	Stramenopiles	H	Sommeria-Klein et al. (2021)	0	0	59	0	285	0	41	0		29	0	18	12	0	0	9	15	0	0	0	0	16	9	0
D_0__Eukaryota;D_1__SAR;D_2__Stramenopiles;D_3__MAST-4;D_4__uncultured eukaryote;D_5__uncultured eukaryote;D_6__uncultured eukaryote	Stramenopiles	H	Sommeria-Klein et al. (2021)	0	13	23	0	64	0	5	0		9	0	0	0	0	0	0	0	0	0	0	0	0	0	0
D_0__Eukaryota;D_1__SAR;D_2__Stramenopiles;D_3__MAST-4;__;__;__	Stramenopiles	H	Sommeria-Klein et al. (2021)	0	85	43	0	38	0	0	0		0	0	0	0	0	0	0	0	17	0	0	0	0	0	137
D_0__Eukaryota;D_1__SAR;D_2__Stramenopiles;D_3__MAST-7;Ambiguous_taxa;Ambiguous_taxa;Ambiguous_taxa	Stramenopiles	H	Sommeria-Klein et al. (2021)	0	0	0	0	7	0	2	0		8	0	7	3	0	0	7	16	23	0	5	0	41	7	5
D_0__Eukaryota;D_1__SAR;D_2__Stramenopiles;D_3__MAST-7;D_4__MAST-7A;Ambiguous_taxa;Ambiguous_taxa	Stramenopiles	H	Sommeria-Klein et al. (2021)	2	20	47	8	85	0	33	0		12	0	0	4	6	0	0	18	25	12	9	0	53	0	32
D_0__Eukaryota;D_1__SAR;D_2__Stramenopiles;D_3__MAST-7;D_4__MAST-7B;Ambiguous_taxa;Ambiguous_taxa	Stramenopiles	H	Sommeria-Klein et al. (2021)	12	148	102	33	286	5	39	0		29	12	19	11	0	47	20	91	157	16	25	0	115	19	281
D_0__Eukaryota;D_1__SAR;D_2__Stramenopiles;D_3__MAST-7;D_4__MAST-7D;Ambiguous_taxa;Ambiguous_taxa	Stramenopiles	H	Sommeria-Klein et al. (2021)	0	0	6	0	16	0	8	0		0	0	5	7	0	6	0	5	5	0	0	0	5	6	0
D_0__Eukaryota;D_1__SAR;D_2__Stramenopiles;D_3__MAST-7;D_4__MAST-7D;D_5__uncultured eukaryote;D_6__uncultured eukaryote	Stramenopiles	H	Sommeria-Klein et al. (2021)	0	0	0	0	0	0	0	0		0	0	2	7	0	8	0	20	15	0	0	0	29	8	0
D_0__Eukaryota;D_1__SAR;D_2__Stramenopiles;D_3__MAST-8;Ambiguous_taxa;Ambiguous_taxa;Ambiguous_taxa	Stramenopiles	H	Sommeria-Klein et al. (2021)	0	0	0	0	0	0	0	0		0	0	4	0	0	3	0	0	0	0	0	0	6	0	0
D_0__Eukaryota;D_1__SAR;D_2__Stramenopiles;D_3__MAST-8;D_4__uncultured eukaryote;D_5__uncultured eukaryote;D_6__uncultured eukaryote	Stramenopiles	H	Sommeria-Klein et al. (2021)	0	21	15	0	11	0	6	0		12	0	4	0	0	0	0	10	0	0	0	0	8	0	0
D_0__Eukaryota;D_1__SAR;D_2__Stramenopiles;D_3__MAST-8;D_4__uncultured stramenopile;D_5__uncultured stramenopile;D_6__uncultured stramenopile	Stramenopiles	H	Sommeria-Klein et al. (2021)	5	48	15	5	17	0	17	0		36	0	0	0	0	0	0	11	0	0	5	0	10	4	4
D_0__Eukaryota;D_1__SAR;D_2__Stramenopiles;D_3__MAST-8;__;__;__	Stramenopiles	H	Sommeria-Klein et al. (2021)	0	59	11	8	21	0	0	0		8	0	0	0	0	0	0	0	0	9	0	0	4	0	0
D_0__Eukaryota;D_1__SAR;D_2__Stramenopiles;D_3__MAST-9;D_4__MAST-9A;Ambiguous_taxa;Ambiguous_taxa	Stramenopiles	H	Sommeria-Klein et al. (2021)	0	0	0	0	0	0	0	0		0	0	0	4	0	2	0	0	0	0	0	0	0	0	0
D_0__Eukaryota;D_1__SAR;D_2__Stramenopiles;D_3__MAST-9;D_4__MAST-9A;D_5__uncultured eukaryote;D_6__uncultured eukaryote	Stramenopiles	H	Sommeria-Klein et al. (2021)	0	0	0	0	0	0	0	0		0	0	0	2	0	0	0	0	0	0	0	0	0	0	0
D_0__Eukaryota;D_1__SAR;D_2__Stramenopiles;D_3__MAST-9;D_4__MAST-9A;__;__	Stramenopiles	H	Sommeria-Klein et al. (2021)	0	0	0	0	0	0	0	0		0	11	0	0	0	0	0	0	0	0	0	0	0	0	0
D_0__Eukaryota;D_1__SAR;D_2__Stramenopiles;D_3__MAST-9;D_4__MAST-9C;D_5__uncultured eukaryote;D_6__uncultured eukaryote	Stramenopiles	H	Sommeria-Klein et al. (2021)	0	0	0	0	6	0	0	0		0	0	0	0	7	4	0	0	0	0	3	0	0	0	0
D_0__Eukaryota;D_1__SAR;D_2__Stramenopiles;D_3__MAST-9;D_4__uncultured eukaryote;D_5__uncultured eukaryote;D_6__uncultured eukaryote	Stramenopiles	H	Sommeria-Klein et al. (2021)	0	0	3	0	3	0	0	0		0	0	0	0	0	0	0	0	0	0	0	0	0	0	0
D_0__Eukaryota;D_1__SAR;D_2__Stramenopiles;D_3__MAST-9;D_4__uncultured marine eukaryote;D_5__uncultured marine eukaryote;D_6__uncultured marine eukaryote	Stramenopiles	H	Sommeria-Klein et al. (2021)	0	0	21	0	14	0	26	0		0	5	8	4	14	6	0	0	0	3	22	0	0	0	10
D_0__Eukaryota;D_1__SAR;D_2__Stramenopiles;D_3__Ochrophyta;D_4__ANT37-16;D_5__uncultured eukaryote;D_6__uncultured eukaryote	Stramenopiles	A	Brown and Sorhannus (2010)	0	0	17	0	20	0	5	0		8	0	0	0	0	0	0	0	6	7	0	0	5	6	0
D_0__Eukaryota;D_1__SAR;D_2__Stramenopiles;D_3__Ochrophyta;D_4__ANT37-16;D_5__uncultured stramenopile;D_6__uncultured stramenopile	Stramenopiles	A	Brown and Sorhannus (2010)	0	0	0	0	0	0	0	0		0	0	0	0	0	0	0	0	0	0	0	0	0	0	11
D_0__Eukaryota;D_1__SAR;D_2__Stramenopiles;D_3__Ochrophyta;D_4__Bolidomonas;Ambiguous_taxa;Ambiguous_taxa	Stramenopiles	A	Brown and Sorhannus (2010)	0	9	239	18	514	0	491	4		234	13	42	4	8	7	2	5	20	66	35	0	29	45	0
D_0__Eukaryota;D_1__SAR;D_2__Stramenopiles;D_3__Ochrophyta;D_4__Bolidomonas;D_5__uncultured marine eukaryote;D_6__uncultured marine eukaryote	Stramenopiles	A	Brown and Sorhannus (2010)	0	0	0	0	4	0	0	0		0	0	0	0	0	0	0	0	0	0	0	0	11	0	0
D_0__Eukaryota;D_1__SAR;D_2__Stramenopiles;D_3__Ochrophyta;D_4__Bolidomonas;__;__	Stramenopiles	A	Brown and Sorhannus (2010)	3	27	17	2	23	0	0	0		21	0	0	8	0	3	0	24	16	0	8	2	17	0	0
D_0__Eukaryota;D_1__SAR;D_2__Stramenopiles;D_3__Ochrophyta;D_4__Chrysophyceae;D_5__uncultured;Ambiguous_taxa	Stramenopiles	A	Brown and Sorhannus (2010)	0	6	40	0	92	0	37	3		53	0	15	0	0	18	0	0	4	4	0	0	20	9	15
D_0__Eukaryota;D_1__SAR;D_2__Stramenopiles;D_3__Ochrophyta;D_4__Chrysophyceae;D_5__uncultured;D_6__uncultured eukaryote	Stramenopiles	A	Brown and Sorhannus (2010)	4	27	27	3	26	0	9	0		42	0	0	0	0	0	2	0	0	0	0	0	3	4	0
D_0__Eukaryota;D_1__SAR;D_2__Stramenopiles;D_3__Ochrophyta;D_4__Chrysophyceae;D_5__uncultured;D_6__uncultured marine picoeukaryote	Stramenopiles	A	Brown and Sorhannus (2010)	0	15	20	0	40	0	6	0		18	0	0	0	0	0	0	0	9	0	0	0	9	7	0
D_0__Eukaryota;D_1__SAR;D_2__Stramenopiles;D_3__Ochrophyta;D_4__Chrysophyceae;D_5__uncultured;D_6__uncultured stramenopile	Stramenopiles	A	Brown and Sorhannus (2010)	0	18	0	0	0	0	0	0		49	0	0	6	6	0	0	0	8	0	0	0	2	0	0
D_0__Eukaryota;D_1__SAR;D_2__Stramenopiles;D_3__Ochrophyta;D_4__Chrysophyceae;D_5__uncultured;__	Stramenopiles	A	Brown and Sorhannus (2010)	0	0	4	0	0	0	0	0		38	8	0	6	8	51	77	59	56	18	26	0	9	3	3
D_0__Eukaryota;D_1__SAR;D_2__Stramenopiles;D_3__Ochrophyta;D_4__Diatomea;D_5__Coscinodiscophytina;D_6__Asteromphalus sp. TN-2014	Stramenopiles	A	Brown and Sorhannus (2010)	0	7	86	0	23	0	46	0		37	18	11	0	6	0	0	10	0	0	0	0	0	7	0
D_0__Eukaryota;D_1__SAR;D_2__Stramenopiles;D_3__Ochrophyta;D_4__Diatomea;D_5__Coscinodiscophytina;D_6__Coscinodiscophyceae sp. TN-2014	Stramenopiles	A	Brown and Sorhannus (2010)	0	0	13	0	0	0	0	0		0	0	17	13	2	0	0	0	0	0	0	0	0	0	0
D_0__Eukaryota;D_1__SAR;D_2__Stramenopiles;D_3__Ochrophyta;D_4__Dictyochophyceae;D_5__Pedinellales;Ambiguous_taxa	Stramenopiles	A	Brown and Sorhannus (2010)	0	6	10	8	0	0	7	0		7	0	0	0	0	0	0	0	0	0	0	0	0	0	0
D_0__Eukaryota;D_1__SAR;D_2__Stramenopiles;D_3__Ochrophyta;D_4__Dictyochophyceae;D_5__Pedinellales;D_6__uncultured marine eukaryote	Stramenopiles	A	Brown and Sorhannus (2010)	0	5	17	0	7	0	8	0		0	0	0	0	0	0	0	0	0	0	0	0	0	4	0
D_0__Eukaryota;D_1__SAR;D_2__Stramenopiles;D_3__Ochrophyta;D_4__Dictyochophyceae;__;__	Stramenopiles	A	Brown and Sorhannus (2010)	0	3	39	0	21	0	22	0		0	0	6	0	0	0	3	0	15	5	0	0	15	12	0
D_0__Eukaryota;D_1__SAR;D_2__Stramenopiles;D_3__Ochrophyta;D_4__MOCH-2;D_5__uncultured eukaryote;D_6__uncultured eukaryote	Stramenopiles	A	Brown and Sorhannus (2010)	0	14	61	0	39	0	62	0		37	5	6	5	0	6	0	23	25	21	0	0	8	28	0
D_0__Eukaryota;D_1__SAR;D_2__Stramenopiles;D_3__Ochrophyta;D_4__Pelagophyceae;D_5__uncultured eukaryote;D_6__uncultured eukaryote	Stramenopiles	A	Brown and Sorhannus (2010)	43	141	690	42	1649	34	739	82		1648	557	724	508	311	809	170	1234	950	511	523	110	742	567	122
D_0__Eukaryota;D_1__SAR;D_2__Stramenopiles;D_3__Ochrophyta;D_4__Raphidophyceae;Ambiguous_taxa;Ambiguous_taxa	Stramenopiles	A	Brown and Sorhannus (2010)	0	0	19	0	70	0	5	0		10	0	14	0	0	4	0	0	18	20	6	0	7	9	0
D_0__Eukaryota;D_1__SAR;D_2__Stramenopiles;D_3__Ochrophyta;D_4__Raphidophyceae;D_5__Olisthodiscus;Ambiguous_taxa	Stramenopiles	A	Brown and Sorhannus (2010)	0	0	7	0	0	0	0	0		0	10	0	0	6	0	0	0	0	0	0	0	0	0	0
D_0__Eukaryota;D_1__SAR;D_2__Stramenopiles;D_3__Ochrophyta;D_5__Bacillariophytina;D_6__Bacillariophyceae;Ambiguous_taxa	Stramenopiles	A	Brown and Sorhannus (2010)	9	195	268	145	502	34	1133	37		1167	624	1278	200	154	249	198	2557	1673	418	2048	36	2740	273	111
D_0__Eukaryota;D_1__SAR;D_2__Stramenopiles;D_3__Ochrophyta;D_5__Chattonellales;D_6__Heterosigma;D_7__Heterosigma akashiwo	Stramenopiles	M	Burkholder et al. (2008)	0	0	0	0	0	0	0	0		9	0	7	0	0	0	0	0	0	0	0	0	0	0	0
D_0__Eukaryota;D_1__SAR;D_2__Stramenopiles;D_3__Ochrophyta;D_5__Chattonellales;__;__	Stramenopiles	M	Burkholder et al. (2008)	0	0	12	0	14	0	0	0		0	0	0	0	0	0	0	0	0	0	0	0	0	0	0
D_0__Eukaryota;D_1__SAR;D_2__Stramenopiles;D_3__Ochrophyta;D_5__Coscinodiscophytina;D_6__Actinocyclus;Ambiguous_taxa	Stramenopiles	A	Brown and Sorhannus (2010)	0	3	67	10	41	0	147	20		0	29	45	0	21	9	0	12	0	21	17	0	0	17	0
D_0__Eukaryota;D_1__SAR;D_2__Stramenopiles;D_3__Ochrophyta;D_5__Coscinodiscophytina;D_6__Coscinodiscus;Ambiguous_taxa	Stramenopiles	A	Brown and Sorhannus (2010)	0	0	3	0	0	0	0	0		0	0	0	0	0	0	0	0	0	0	0	0	0	0	0
D_0__Eukaryota;D_1__SAR;D_2__Stramenopiles;D_3__Ochrophyta;D_5__Coscinodiscophytina;D_6__Fragilariales;D_7__Mastogloia sp. 29x07-6B	Stramenopiles	A	Brown and Sorhannus (2010)	0	0	5	0	0	0	0	0		0	4	0	10	10	14	6	24	12	4	2	0	0	3	0
D_0__Eukaryota;D_1__SAR;D_2__Stramenopiles;D_3__Ochrophyta;D_5__Coscinodiscophytina;__;__	Stramenopiles	A	Brown and Sorhannus (2010)	0	0	0	0	9	0	0	0		0	0	0	0	0	0	0	0	0	0	0	0	0	0	0
D_0__Eukaryota;D_1__SAR;D_2__Stramenopiles;D_3__Ochrophyta;D_5__Dictyochales;D_6__Dictyocha;__	Stramenopiles	A	Brown and Sorhannus (2010)	0	7	13	0	12	0	12	0		11	6	0	4	0	0	0	0	0	0	0	0	0	4	0
D_0__Eukaryota;D_1__SAR;D_2__Stramenopiles;D_3__Ochrophyta;D_5__Dictyochales;D_6__Florenciella;Ambiguous_taxa	Stramenopiles	M	Li et al. (2021)	0	15	0	0	0	0	0	0		28	17	0	0	0	0	0	10	0	0	0	0	35	0	20
D_0__Eukaryota;D_1__SAR;D_2__Stramenopiles;D_3__Ochrophyta;D_5__Dictyochales;D_6__Florenciella;D_7__uncultured marine eukaryote	Stramenopiles	M	Li et al. (2021)	0	0	0	0	7	0	0	0		47	0	0	0	0	24	0	23	32	0	24	0	45	47	0
D_0__Eukaryota;D_1__SAR;D_2__Stramenopiles;D_3__Ochrophyta;D_5__Dictyochales;D_6__Florenciella;__	Stramenopiles	M	Li et al. (2021)	0	0	40	0	51	0	37	0		0	0	18	0	6	0	0	0	0	22	0	0	0	0	0
D_0__Eukaryota;D_1__SAR;D_2__Stramenopiles;D_3__Ochrophyta;D_5__Dictyotales;Ambiguous_taxa;Ambiguous_taxa	Stramenopiles	A	Brown and Sorhannus (2010)	0	0	0	0	0	0	0	0		0	0	3	0	0	0	0	0	0	0	0	0	0	0	0
D_0__Eukaryota;D_1__SAR;D_2__Stramenopiles;D_3__Ochrophyta;D_5__Eustigmatales;D_6__uncultured;Ambiguous_taxa	Stramenopiles	A	Brown and Sorhannus (2010)	0	50	4	16	0	49	9	0		559	15	9	0	6	9	0	0	4	0	0	0	0	4	6
D_0__Eukaryota;D_1__SAR;D_2__Stramenopiles;D_3__Ochrophyta;D_5__Eustigmatales;D_6__uncultured;D_7__uncultured eukaryote	Stramenopiles	A	Brown and Sorhannus (2010)	0	4	12	0	12	0	26	0		28	6	18	6	0	0	0	10	9	25	9	0	34	27	0
D_0__Eukaryota;D_1__SAR;D_2__Stramenopiles;D_3__Ochrophyta;D_5__Florenciellales;D_6__Pseudochattonella;Ambiguous_taxa	Stramenopiles	A	Brown and Sorhannus (2010)	2	49	17	0	40	0	11	0		63	10	11	0	0	12	3	27	0	11	0	0	25	22	0
D_0__Eukaryota;D_1__SAR;D_2__Stramenopiles;D_3__Ochrophyta;D_5__Ochromonadales;D_6__Epipyxis;D_7__uncultured marine eukaryote	Stramenopiles	A	Brown and Sorhannus (2010)	0	48	8	26	11	9	10	0		60	0	0	0	0	0	3	0	0	5	0	0	0	7	0
D_0__Eukaryota;D_1__SAR;D_2__Stramenopiles;D_3__Ochrophyta;D_5__Ochromonadales;D_6__Paraphysomonas;Ambiguous_taxa	Stramenopiles	H	Peters et al. (1996)	0	0	0	0	0	0	0	0		0	0	2	0	0	0	0	0	0	0	0	0	0	0	0
D_0__Eukaryota;D_1__SAR;D_2__Stramenopiles;D_3__Ochrophyta;D_5__Ochromonadales;D_6__Paraphysomonas;D_7__uncultured marine eukaryote	Stramenopiles	H	Peters et al. (1996)	0	4	19	0	28	0	0	0		0	0	0	0	0	0	0	0	0	9	0	0	12	0	37
D_0__Eukaryota;D_1__SAR;D_2__Stramenopiles;D_3__Ochrophyta;D_5__Ochromonadales;D_6__uncultured;D_7__uncultured eukaryote	Stramenopiles	A	Brown and Sorhannus (2010)	0	0	0	0	11	0	0	0		9	0	0	0	0	0	0	0	0	0	0	0	0	0	0
D_0__Eukaryota;D_1__SAR;D_2__Stramenopiles;D_3__Ochrophyta;D_5__Ochromonadales;__;__	Stramenopiles	A	Brown and Sorhannus (2010)	0	0	0	0	0	0	4	0		16	0	0	0	0	0	0	0	0	0	0	0	0	0	0
D_0__Eukaryota;D_1__SAR;D_2__Stramenopiles;D_3__Ochrophyta;D_5__Pelagomonadales;D_6__Aureococcus;D_7__Aureococcus anophagefferens	Stramenopiles	M	Burkholder et al. (2008)	0	58	14	5	23	0	8	0		18	0	0	0	0	0	0	0	0	0	0	0	0	0	0
D_0__Eukaryota;D_1__SAR;D_2__Stramenopiles;D_3__Ochrophyta;D_5__Pelagomonadales;__;__	Stramenopiles	A	Sommeria-Klein et al. (2021)	0	19	77	35	162	0	69	24		120	74	148	40	123	91	32	20	50	109	76	0	28	55	42
D_0__Eukaryota;D_1__SAR;D_2__Stramenopiles;D_3__Ochrophyta;D_5__Sarcinochrysidales;D_6__SS1-E01-69;__	Stramenopiles	A	Sommeria-Klein et al. (2021)	15	362	0	49	115	0	0	7		935	0	14	0	0	13	0	0	8	0	0	0	0	132	19
D_0__Eukaryota;D_1__SAR;D_2__Stramenopiles;D_3__Ochrophyta;D_6__Bacillariophyceae;Ambiguous_taxa;Ambiguous_taxa	Diatoms	A	Schneider et al. (2020)	0	0	0	0	0	0	3	15		0	137	0	0	0	0	0	14	0	0	16	0	0	0	0
D_0__Eukaryota;D_1__SAR;D_2__Stramenopiles;D_3__Ochrophyta;D_6__Bacillariophyceae;D_7__Cylindrotheca;D_8__Cylindrotheca closterium	Diatoms	A	Schneider et al. (2020)	0	0	93	0	39	19	59	0		76	41	64	18	42	84	22	113	9	9	13	0	0	9	82
D_0__Eukaryota;D_1__SAR;D_2__Stramenopiles;D_3__Ochrophyta;D_6__Bacillariophyceae;D_7__Fragilariopsis;D_8__uncultured eukaryote	Diatoms	A	Schneider et al. (2020)	0	0	44	4	0	0	79	0		17	7	0	4	0	14	9	13	6	11	3	0	0	0	0
D_0__Eukaryota;D_1__SAR;D_2__Stramenopiles;D_3__Ochrophyta;D_6__Bacillariophyceae;D_7__Navicula;Ambiguous_taxa	Diatoms	A	Schneider et al. (2020)	0	0	0	0	14	0	7	0		0	0	0	0	0	0	0	0	0	0	0	0	0	0	0
D_0__Eukaryota;D_1__SAR;D_2__Stramenopiles;D_3__Ochrophyta;D_6__Bacillariophyceae;D_7__Nitzschia;Ambiguous_taxa	Diatoms	A	Schneider et al. (2020)	0	0	0	0	0	0	0	0		32	12	25	14	15	0	12	35	0	11	3	0	9	0	0
D_0__Eukaryota;D_1__SAR;D_2__Stramenopiles;D_3__Ochrophyta;D_6__Bacillariophyceae;D_7__Pseudo-nitzschia;Ambiguous_taxa	Diatoms	A	Schneider et al. (2020)	42	2564	442	499	721	262	1015	44		3490	61	44	0	14	11	20	668	286	29	78	0	426	361	66
D_0__Eukaryota;D_1__SAR;D_2__Stramenopiles;D_3__Ochrophyta;D_6__Bacillariophyceae;__;__	Diatoms	A	Schneider et al. (2020)	0	5	131	0	32	0	125	0		128	23	88	85	23	4	0	160	9	9	7	0	8	13	29
D_0__Eukaryota;D_1__SAR;D_2__Stramenopiles;D_3__Ochrophyta;D_6__Corethrids;D_7__Corethron;Ambiguous_taxa	Diatoms	A	Schneider et al. (2020)	0	6	3	0	0	14	0	0		502	0	2	0	8	0	0	13	29	0	7	0	0	76	5
D_0__Eukaryota;D_1__SAR;D_2__Stramenopiles;D_3__Ochrophyta;D_6__Fragilariales;D_7__Thalassionema;Ambiguous_taxa	Diatoms	A	Schneider et al. (2020)	0	0	0	0	16	0	0	0		0	20	0	14	0	0	5	14	0	0	0	0	0	0	0
D_0__Eukaryota;D_1__SAR;D_2__Stramenopiles;D_3__Ochrophyta;D_6__Mediophyceae;Ambiguous_taxa;Ambiguous_taxa	Diatoms	A	Schneider et al. (2020)	0	0	0	0	0	0	0	0		0	3	0	0	0	0	7	0	0	0	0	0	0	0	0
D_0__Eukaryota;D_1__SAR;D_2__Stramenopiles;D_3__Ochrophyta;D_6__Mediophyceae;D_7__Arcocellulus;D_8__Arcocellulus mammifer	Diatoms	A	Schneider et al. (2020)	0	13	9	0	0	0	0	0		0	159	0	0	0	0	0	11	0	0	15	0	0	16	0
D_0__Eukaryota;D_1__SAR;D_2__Stramenopiles;D_3__Ochrophyta;D_6__Mediophyceae;D_7__Attheya;Ambiguous_taxa	Diatoms	A	Schneider et al. (2020)	0	0	0	0	0	0	0	5		0	0	0	0	0	0	0	0	0	0	0	0	0	0	0
D_0__Eukaryota;D_1__SAR;D_2__Stramenopiles;D_3__Ochrophyta;D_6__Mediophyceae;D_7__Brockmanniella;D_8__Brockmanniella brockmannii	Diatoms	A	Schneider et al. (2020)	0	17	41	5	26	0	76	0		47	56	4	0	0	0	12	10	0	15	11	0	0	12	5
D_0__Eukaryota;D_1__SAR;D_2__Stramenopiles;D_3__Ochrophyta;D_6__Mediophyceae;D_7__Cerataulina;D_8__Cerataulina daemon	Diatoms	A	Schneider et al. (2020)	0	0	0	0	0	0	0	0		0	0	9	0	0	0	0	0	0	0	0	0	0	0	0
D_0__Eukaryota;D_1__SAR;D_2__Stramenopiles;D_3__Ochrophyta;D_6__Mediophyceae;D_7__Chaetoceros;Ambiguous_taxa	Diatoms	A	Schneider et al. (2020)	1326	6055	1280	941	480	80	397	489		1599	39	90	5	71	96	182	1790	1031	82	112	8	35176	400	542
D_0__Eukaryota;D_1__SAR;D_2__Stramenopiles;D_3__Ochrophyta;D_6__Mediophyceae;D_7__Chaetoceros;D_8__Chaetoceros brevis	Diatoms	A	Schneider et al. (2020)	2	0	0	0	0	2	0	0		17	6	0	0	0	12	0	0	0	0	0	0	0	0	0
D_0__Eukaryota;D_1__SAR;D_2__Stramenopiles;D_3__Ochrophyta;D_6__Mediophyceae;D_7__Chaetoceros;D_8__Chaetoceros debilis	Diatoms	A	Schneider et al. (2020)	0	0	0	0	0	0	0	0		28	0	0	0	0	0	0	0	0	0	0	0	0	0	5
D_0__Eukaryota;D_1__SAR;D_2__Stramenopiles;D_3__Ochrophyta;D_6__Mediophyceae;D_7__Chaetoceros;D_8__Chaetoceros elegans	Diatoms	A	Schneider et al. (2020)	0	0	7	0	9	0	0	0		0	0	0	0	0	0	0	0	0	0	0	0	0	0	0
D_0__Eukaryota;D_1__SAR;D_2__Stramenopiles;D_3__Ochrophyta;D_6__Mediophyceae;D_7__Chaetoceros;D_8__Chaetoceros sp.	Diatoms	A	Schneider et al. (2020)	0	13	19	19	0	15	49	0		151	0	0	0	6	0	0	7	0	0	4	0	0	0	10
D_0__Eukaryota;D_1__SAR;D_2__Stramenopiles;D_3__Ochrophyta;D_6__Mediophyceae;D_7__Chaetoceros;D_8__Chaetoceros sp. CCAP 1010/16	Diatoms	A	Schneider et al. (2020)	0	3	0	0	0	0	0	0		0	0	0	0	0	0	0	0	0	0	0	0	0	0	0
D_0__Eukaryota;D_1__SAR;D_2__Stramenopiles;D_3__Ochrophyta;D_6__Mediophyceae;D_7__Chaetoceros;D_8__Chaetoceros sp. NIES-3971	Diatoms	A	Schneider et al. (2020)	0	0	0	0	0	0	0	0		0	6	0	0	0	0	0	0	0	0	0	0	0	0	0
D_0__Eukaryota;D_1__SAR;D_2__Stramenopiles;D_3__Ochrophyta;D_6__Mediophyceae;D_7__Chaetoceros;D_8__Chaetoceros sp. UNC1414	Diatoms	A	Schneider et al. (2020)	5	20	749	18	95	10	182	4		51	0	0	0	0	17	0	0	0	0	0	0	12	7	0
D_0__Eukaryota;D_1__SAR;D_2__Stramenopiles;D_3__Ochrophyta;D_6__Mediophyceae;D_7__Chaetoceros;D_8__uncultured eukaryote	Diatoms	A	Schneider et al. (2020)	0	0	21	0	7	0	15	0		0	0	0	0	0	0	0	0	0	0	0	0	0	0	0
D_0__Eukaryota;D_1__SAR;D_2__Stramenopiles;D_3__Ochrophyta;D_6__Mediophyceae;D_7__Chaetoceros;D_8__uncultured marine eukaryote	Diatoms	A	Schneider et al. (2020)	5	0	8	0	0	0	6	0		5	11	0	0	0	0	0	0	0	0	0	0	0	0	0
D_0__Eukaryota;D_1__SAR;D_2__Stramenopiles;D_3__Ochrophyta;D_6__Mediophyceae;D_7__Chaetoceros;D_8__uncultured stramenopile	Diatoms	A	Schneider et al. (2020)	0	7	193	0	23	0	12	0		13	8	8	0	0	14	0	0	3	0	0	0	0	0	0
D_0__Eukaryota;D_1__SAR;D_2__Stramenopiles;D_3__Ochrophyta;D_6__Mediophyceae;D_7__Chaetoceros;__	Diatoms	A	Schneider et al. (2020)	0	0	28	0	0	0	0	0		0	0	0	0	0	0	0	0	0	0	0	0	0	0	0
D_0__Eukaryota;D_1__SAR;D_2__Stramenopiles;D_3__Ochrophyta;D_6__Mediophyceae;D_7__Cyclotella;Ambiguous_taxa	Diatoms	A	Schneider et al. (2020)	0	0	0	0	0	0	0	0		0	0	0	0	2	0	0	0	0	0	0	0	0	0	0
D_0__Eukaryota;D_1__SAR;D_2__Stramenopiles;D_3__Ochrophyta;D_6__Mediophyceae;D_7__Skeletonema;Ambiguous_taxa	Diatoms	A	Schneider et al. (2020)	11	9	11	2	2	0	0	29		19	361	0	0	0	7	20	26	70	8	34	0	9	31	510
D_0__Eukaryota;D_1__SAR;D_2__Stramenopiles;D_3__Ochrophyta;D_6__Mediophyceae;D_7__Skeletonema;__	Diatoms	A	Schneider et al. (2020)	0	0	2	0	0	0	0	0		0	0	0	0	0	0	0	0	0	0	0	0	0	0	0
D_0__Eukaryota;D_1__SAR;D_2__Stramenopiles;D_3__Ochrophyta;D_6__Mediophyceae;D_7__Thalassiosira;Ambiguous_taxa	Diatoms	A	Schneider et al. (2020)	0	12	35	0	11	0	3	0		57	377	0	0	6	5	16	0	34	0	0	0	0	0	19
D_0__Eukaryota;D_1__SAR;D_2__Stramenopiles;D_3__Ochrophyta;D_6__Mediophyceae;D_7__Thalassiosira;D_8__uncultured eukaryote	Diatoms	A	Schneider et al. (2020)	11	6	0	0	30	0	0	18		26	585	0	0	23	25	53	61	49	0	42	0	0	0	29
D_0__Eukaryota;D_1__SAR;D_2__Stramenopiles;D_3__Ochrophyta;D_6__Mediophyceae;D_7__Thalassiosira;D_8__uncultured marine eukaryote	Diatoms	A	Schneider et al. (2020)	0	0	0	0	0	0	0	0		9	0	8	0	8	0	0	0	0	0	0	0	0	0	0
D_0__Eukaryota;D_1__SAR;D_2__Stramenopiles;D_3__Ochrophyta;D_6__Mediophyceae;D_7__Thalassiosira;__	Diatoms	A	Schneider et al. (2020)	204	2389	1846	1234	1678	385	2498	405		3886	626	436	87	140	239	206	741	612	539	745	33	9083	818	274
D_0__Eukaryota;D_1__SAR;D_2__Stramenopiles;D_3__Ochrophyta;D_6__Mediophyceae;D_7__uncultured;D_8__uncultured marine eukaryote	Diatoms	A	Schneider et al. (2020)	0	0	3	0	0	0	0	0		0	0	0	0	0	0	0	0	0	0	0	0	0	0	0
D_0__Eukaryota;D_1__SAR;D_2__Stramenopiles;D_3__Ochrophyta;D_6__Mediophyceae;__;__	Diatoms	A	Schneider et al. (2020)	3	31	44	0	4	0	4	29		153	0	6	0	0	0	0	0	182	0	0	0	41	0	230
D_0__Eukaryota;D_1__SAR;D_2__Stramenopiles;D_3__Ochrophyta;D_6__Melosirids;D_7__Stephanopyxis;Ambiguous_taxa	Diatoms	A	Schneider et al. (2020)	0	0	0	0	0	0	0	0		0	0	0	0	0	0	0	2	0	0	0	0	0	0	0
D_0__Eukaryota;D_1__SAR;D_2__Stramenopiles;D_3__Ochrophyta;D_6__Rhizosolenids;D_7__Guinardia;Ambiguous_taxa	Diatoms	A	Schneider et al. (2020)	2	5	11	0	8	4	10	0		20	11	6	0	12	0	27	5	14	0	9	0	2	6	0
D_0__Eukaryota;D_1__SAR;D_2__Stramenopiles;D_3__Ochrophyta;D_6__Rhizosolenids;D_7__Leptocylindrus;Ambiguous_taxa	Diatoms	A	Schneider et al. (2020)	0	0	0	0	0	0	0	0		0	12	0	0	0	0	2	0	0	0	0	0	0	0	0
D_0__Eukaryota;D_1__SAR;D_2__Stramenopiles;D_3__Ochrophyta;D_6__Rhizosolenids;D_7__Leptocylindrus;D_8__Leptocylindrus minimus	Diatoms	A	Schneider et al. (2020)	0	0	0	0	0	0	0	0		0	0	0	0	0	0	0	3	0	0	0	0	0	0	3
D_0__Eukaryota;D_1__SAR;D_2__Stramenopiles;D_3__Ochrophyta;D_6__Rhizosolenids;D_7__Rhizosolenia;Ambiguous_taxa	Diatoms	A	Schneider et al. (2020)	0	0	0	0	0	0	0	0		0	30	0	29	16	5	0	18	8	0	0	0	0	8	0
D_0__Eukaryota;D_1__SAR;D_2__Stramenopiles;D_3__Ochrophyta;__;__;__	Diatoms	A	Schneider et al. (2020)	32	244	380	136	364	59	1505	97		371	284	659	148	191	164	131	307	172	597	277	57	88	183	102
D_0__Eukaryota;D_1__SAR;D_2__Stramenopiles;D_3__Peronosporomycetes;Ambiguous_taxa;Ambiguous_taxa;Ambiguous_taxa	Stramenopiles	H	Singer et al. (2021)	0	0	0	0	0	0	0	5		0	0	0	0	0	0	0	0	0	0	0	0	0	0	0
D_0__Eukaryota;D_1__SAR;D_2__Stramenopiles;D_3__Peronosporomycetes;D_4__Olpidiopsis;D_5__Olpidiopsis sp. 4439;D_6__Olpidiopsis sp. 4439	Stramenopiles	H	Singer et al. (2021)	0	0	0	0	0	0	0	0		0	0	0	0	0	0	0	0	0	0	4	0	0	0	0
D_0__Eukaryota;D_1__SAR;D_2__Stramenopiles;D_3__Peronosporomycetes;D_4__Olpidiopsis;__;__	Stramenopiles	H	Singer et al. (2021)	0	0	0	0	10	0	0	0		0	0	0	0	0	0	0	0	0	0	0	0	0	0	0
D_0__Eukaryota;D_1__SAR;D_2__Stramenopiles;D_3__Peronosporomycetes;D_4__uncultured;Ambiguous_taxa;Ambiguous_taxa	Stramenopiles	H	Singer et al. (2021)	0	4	0	0	0	0	0	0		0	19	0	0	0	0	0	0	0	0	0	0	0	5	0
D_0__Eukaryota;D_1__SAR;D_2__Stramenopiles;D_3__Peronosporomycetes;D_4__uncultured;D_5__uncultured stramenopile;D_6__uncultured stramenopile	Stramenopiles	H	Singer et al. (2021)	0	0	0	0	0	0	0	0		0	34	7	0	0	0	0	0	0	0	0	0	0	0	0
D_0__Eukaryota;D_1__SAR;D_2__Stramenopiles;D_3__Peronosporomycetes;D_4__uncultured;__;__	Stramenopiles	H	Singer et al. (2021)	0	0	0	0	0	0	0	0		9	0	0	0	0	4	0	0	0	0	0	0	0	0	0
D_0__Eukaryota;D_1__SAR;D_2__Stramenopiles;D_3__Peronosporomycetes;__;__;__	Stramenopiles	H	Singer et al. (2021)	39	49	111	4	5	66	10	45		0	0	37	0	0	12	0	0	22	3	13	0	0	4	7
D_0__Eukaryota;D_1__SAR;D_2__Alveolata;D_3__uncultured;D_4__uncultured eukaryote;D_5__uncultured eukaryote;D_6__uncultured eukaryote	Unassinged ASVs	u		0	0	0	5	0	0	0	0		0	7	0	0	0	0	0	0	0	0	0	0	0	0	0
D_0__Eukaryota;D_1__SAR;D_2__Alveolata;D_3__uncultured;D_4__uncultured marine eukaryote;D_5__uncultured marine eukaryote;D_6__uncultured marine eukaryote	Unassinged ASVs	u		0	0	0	0	0	0	0	0		0	0	0	0	0	0	0	0	0	0	3	0	0	0	0
D_0__Eukaryota;D_1__SAR;D_2__Alveolata;__;__;__;__	Unassinged ASVs	u		1813	7544	5180	1958	3351	2340	4079	5505		4454	7268	6493	6486	3044	4101	2632	6003	4438	2861	2390	257	2597	2546	1393
D_0__Eukaryota;D_1__SAR;__;__;__;__;__	Unassinged ASVs	u		0	109	113	6	19	0	26	0		0	0	0	0	0	0	9	0	3	0	0	0	0	0	5
D_0__Eukaryota;D_1__uncultured;Ambiguous_taxa;Ambiguous_taxa;Ambiguous_taxa;Ambiguous_taxa;Ambiguous_taxa	Unassinged ASVs	u		0	0	0	0	0	0	0	0		0	0	0	0	0	0	0	0	0	29	0	0	0	0	0
D_0__Eukaryota;D_1__uncultured;D_2__uncultured marine eukaryote;D_3__uncultured marine eukaryote;D_4__uncultured marine eukaryote;D_5__uncultured marine eukaryote;D_6__uncultured marine eukaryote	Unassinged ASVs	u		0	17	4	2	0	0	0	0		10	0	0	0	0	0	0	0	0	0	0	0	0	0	0
D_0__Eukaryota;__;__;__;__;__;__	Unassinged ASVs	u		14	907	763	62	245	63	273	145		2078	320	697	182	1885	250	136	295	195	29	83	0	55	72	399
	H, Heterotroph	426
	M, Mixotroph	50
	A, Autotroph	136
	u, Undistinguishable	52
	Protistan community			St. RT	St. 2	St. 3	St. 4	St. 5	St. 6	St. 7	St. 29		St. 1	St. 9	St. 10	St. 11	St. 12	St. 15	St. 16	St. 18	St. 20	St. 22	St. 24	St. 26	St. 27	St. 28	St. 14
Total		(Number of ASVs)		31514	156096	77742	99199	85621	66087	70776	30528		158355	52216	88777	41400	37358	53218	23587	51124	44113	46265	51404	165755	109410	47191	85459
Diatoms				1643	11399	5400	2858	3559	850	6045	1135		10697	2875	1449	404	577	697	724	4011	2514	1310	1376	98	44854	1940	1911
Chlorophyta				2176	34801	21145	21479	25903	8154	20187	8499		77538	11036	19945	6032	9084	22917	3751	4960	14824	22943	26515	844	7489	20237	57909
Dinoflagellata				24401	75256	20202	66311	19360	51220	20618	10485		12970	21163	31558	18880	15669	13388	11353	21686	9773	9311	7461	533	5531	6560	13526
Syndiniales				492	4686	13113	3524	18316	1553	11446	2458		21154	3264	14005	4889	3654	6527	2383	3609	4230	5864	8794	281	2176	6845	2244
Ciliophora				298	4952	3389	343	1267	1037	1421	856		8800	1993	1116	1089	794	779	306	1171	940	726	223	58	2180	3469	797
Rhizaria				65	1363	1199	856	3092	300	532	424		1904	751	9112	1434	1481	1389	1175	2011	666	203	604	163408	35124	606	4181
Stramenopiles (except diatoms)				238	3451	3475	1100	5855	311	3782	507		7513	1723	3043	1018	759	1926	774	4843	3939	1891	3134	172	5453	1794	1847
Others				374	11611	3759	695	4654	259	2367	514		11237	1816	1359	986	411	1244	344	2535	2591	1098	821	104	3951	3122	1247
Unassigned taoxnomic groups				1827	8577	6060	2033	3615	2403	4378	5650		6542	7595	7190	6668	4929	4351	2777	6298	4636	2919	2476	257	2652	2618	1797
Diatoms		(Percentage)		0.0521356	0.0730256	0.0694605	0.0288108	0.0415669	0.0128618	0.0854103	0.037179		0.0675508	0.0550598	0.0163218	0.00975845	0.0154452	0.0130971	0.0306949	0.0784563	0.05699	0.0283151	0.0267683	0.000591234	0.409963	0.0411095	0.0223616
Chlorophyta				0.0690487	0.222946	0.271989	0.216524	0.302531	0.123383	0.285224	0.2784		0.489647	0.211353	0.224664	0.1457	0.243161	0.430625	0.159028	0.097019	0.336046	0.495904	0.515816	0.00509185	0.068449	0.428832	0.677623
Dinoflagellata				0.774291	0.482114	0.25986	0.668464	0.226113	0.775039	0.291313	0.343455		0.0819046	0.405297	0.355475	0.456039	0.419428	0.251569	0.481324	0.424184	0.221545	0.201254	0.145144	0.00321559	0.050553	0.13901	0.158275
Syndiniales				0.0156121	0.03002	0.168673	0.0355246	0.213919	0.0234993	0.161721	0.0805162		0.133586	0.0625096	0.157755	0.118092	0.0978104	0.122646	0.10103	0.0705931	0.0958901	0.126748	0.171076	0.00169527	0.0198885	0.145049	0.0262582
Ciliophora				0.00945611	0.0317241	0.0435929	0.0034577	0.0147978	0.0156914	0.0200774	0.0280398		0.0555713	0.0381684	0.0125708	0.0263043	0.0212538	0.0146379	0.0129732	0.0229051	0.0213089	0.0156922	0.00433818	0.000349914	0.0199251	0.0735098	0.00932611
Rhizaria				0.00206258	0.00873181	0.0154228	0.00862912	0.0361126	0.00453947	0.00751667	0.0138889		0.0120236	0.0143826	0.102639	0.0346377	0.0396434	0.0261002	0.0498156	0.0393357	0.0150976	0.00438777	0.0117501	0.985841	0.321031	0.0128414	0.048924
Stramenopiles (except diatoms)				0.0075522	0.0221082	0.0446991	0.0110888	0.0683828	0.00470592	0.0534362	0.0166077		0.047444	0.0329975	0.0342769	0.0245894	0.0203169	0.0361908	0.0328147	0.0947305	0.0892934	0.0408732	0.060968	0.00103768	0.0498401	0.0380157	0.0216127
Others				0.0118677	0.0743837	0.0483522	0.00700612	0.0543558	0.00391908	0.0334435	0.016837		0.0709608	0.0347786	0.015308	0.0238164	0.0110017	0.0233755	0.0145843	0.0495853	0.0587355	0.0237328	0.0159715	0.000627432	0.0361119	0.0661567	0.0145918
Unassigned taoxnomic groups				0.0579742	0.054947	0.0779501	0.0204942	0.042221	0.0363612	0.0618571	0.185076		0.0413122	0.145454	0.0809894	0.161063	0.13194	0.0817581	0.117734	0.123191	0.105094	0.0630931	0.0481675	0.00155048	0.0242391	0.0554767	0.0210276
	Protistan community			St. RT	St. 2	St. 3	St. 4	St. 5	St. 6	St. 7	St. 29		St. 1	St. 9	St. 10	St. 11	St. 12	St. 15	St. 16	St. 18	St. 20	St. 22	St. 24	St. 26	St. 27	St. 28	St. 14
Total		(Number of ASVs)		31514	156096	77742	99199	85621	66087	70776	30528		158355	52216	88777	41400	37358	53218	23587	51124	44113	46265	51404	165755	109410	47191	85459
Undistinguishable				7656	20499	14970	4927	8536	8579	13563	10074		15507	16105	16688	15541	12274	9957	6712	15624	9522	6470	5843	469	6755	5883	6221
Autotroph (A)				17361	55805	29508	25817	33798	9416	29486	10067		95547	15552	24762	7633	10839	25099	5428	13419	21066	25555	31016	1090	56803	24124	60997
Mixotroph (M)				2647	24956	5963	61582	15078	40908	9520	3164		7354	5564	14731	4333	4387	3108	1868	3961	3075	3612	2600	131	2398	3310	7585
Heterotroph (H)				3850	54836	27301	6873	28209	7184	18207	7223		39947	14995	32596	13893	9858	15054	9579	18120	10450	10628	11945	164065	43454	13874	10656
Undistinguishable		(Percentage)		0.24294	0.131323	0.19256	0.0496678	0.0996952	0.129814	0.191633	0.329992		0.0979255	0.30843	0.187977	0.375386	0.328551	0.187098	0.284564	0.30561	0.215855	0.139847	0.113668	0.00282948	0.0617402	0.124664	0.0727951
Autotroph (A)				0.550898	0.357504	0.379563	0.260255	0.39474	0.142479	0.41661	0.329763		0.603372	0.29784	0.278924	0.184372	0.290139	0.471626	0.230127	0.262479	0.477546	0.552361	0.603377	0.00657597	0.519176	0.511199	0.713757
Mixotroph (M)				0.0839944	0.159876	0.0767024	0.620793	0.176102	0.619002	0.134509	0.103643		0.04644	0.106557	0.165933	0.104662	0.117431	0.0584013	0.0791962	0.0774783	0.0697073	0.078072	0.0505797	0.000790323	0.0219176	0.0701405	0.088756
Heterotroph (H)				0.122168	0.351297	0.351174	0.069285	0.329464	0.108705	0.257248	0.236602		0.252262	0.287173	0.367167	0.33558	0.263879	0.282874	0.406114	0.354432	0.236892	0.22972	0.232375	0.989804	0.397167	0.293997	0.124691

## Sheet: Dinoflagellate group_ASVs
Supplementary Table 2B. Functional classification of the dinoflagellates in relation to their trophic modes based on read abundances of 18S rRNA gene amplicon sequencing.
ASV category	Trophic mode	Equatorial undercurrent upwelling (EUC) region									Eastern region
		St. RT	St. 2	St. 3	St. 4	St. 5	St. 6	St. 7	St. 29		St. 1	St. 9	St. 10	St. 11	St. 12	St. 15	St. 16	St. 18	St. 20	St. 22	St. 24	St. 26	St. 27	St. 28	St. 14
D_0__Eukaryota;D_1__SAR;D_2__Alveolata;D_3__Dinoflagellata;Ambiguous_taxa;Ambiguous_taxa;Ambiguous_taxa	u	17	57	21	0	82	0	0	15		514	0	0	0	0	19	0	0	0	0	0	0	7	64	0
D_0__Eukaryota;D_1__SAR;D_2__Alveolata;D_3__Dinoflagellata;Ambiguous_taxa;Ambiguous_taxa;__	u	0	0	0	0	0	0	0	0		0	0	0	0	0	14	0	0	0	0	0	0	0	0	0
D_0__Eukaryota;D_1__SAR;D_2__Alveolata;D_3__Dinoflagellata;D_4__Dinophyceae;D_5__uncultured;Ambiguous_taxa	u	15	291	248	12	98	83	108	25		804	168	58	196	161	153	70	471	248	108	46	6	215	125	0
D_0__Eukaryota;D_1__SAR;D_2__Alveolata;D_3__Dinoflagellata;D_4__Dinophyceae;D_5__uncultured;D_6__uncultured eukaryote	u	0	0	0	0	0	0	0	0		8	0	0	0	0	0	0	0	0	0	0	0	0	0	0
D_0__Eukaryota;D_1__SAR;D_2__Alveolata;D_3__Dinoflagellata;D_4__Dinophyceae;D_5__uncultured;D_6__uncultured marine dinoflagellate	u	0	0	0	0	0	0	0	25		0	0	0	0	0	0	0	0	0	0	0	0	0	0	0
D_0__Eukaryota;D_1__SAR;D_2__Alveolata;D_3__Dinoflagellata;D_4__Dinophyceae;D_5__uncultured;D_6__uncultured marine picoplankton	u	34	157	98	27	136	32	57	17		63	34	111	14	18	0	18	48	41	49	22	0	207	68	182
D_0__Eukaryota;D_1__SAR;D_2__Alveolata;D_3__Dinoflagellata;D_4__Dinophyceae;__;__	u	0	11	0	0	0	0	0	0		0	0	0	0	0	0	0	0	0	0	0	0	0	0	0
D_0__Eukaryota;D_1__SAR;D_2__Alveolata;D_3__Dinoflagellata;D_4__Incertae Sedis;D_5__Blastodinium;Ambiguous_taxa	H	18	152	796	586	161	279	584	224		285	112	2146	460	560	268	120	217	269	195	123	0	223	167	109
D_0__Eukaryota;D_1__SAR;D_2__Alveolata;D_3__Dinoflagellata;D_4__Incertae Sedis;D_5__Haplozoon;Ambiguous_taxa	H	0	386	87	22	28	28	34	15		203	163	21	299	68	29	83	273	56	42	10	9	28	110	42
D_0__Eukaryota;D_1__SAR;D_2__Alveolata;D_3__Dinoflagellata;D_4__Noctilucales;D_5__Abedinium;Ambiguous_taxa	H	0	0	10	0	0	0	0	0		0	0	0	0	0	0	0	0	0	0	0	0	0	0	0
D_0__Eukaryota;D_1__SAR;D_2__Alveolata;D_3__Dinoflagellata;D_4__Noctilucales;D_5__Kofoidinium;D_6__Kofoidinium cf. pavillardii	H	0	0	0	0	0	0	0	0		0	0	10	0	0	0	0	0	0	0	0	0	0	0	0
D_0__Eukaryota;D_1__SAR;D_2__Alveolata;D_3__Dinoflagellata;D_4__Noctilucales;D_5__uncultured eukaryote;D_6__uncultured eukaryote	H	3	0	0	0	0	23	33	11		160	88	91	188	216	112	76	69	81	17	63	0	14	75	33
D_0__Eukaryota;D_1__SAR;D_2__Alveolata;D_3__Dinoflagellata;D_5__Dinophysiales;D_6__Sinophysis;Ambiguous_taxa	H	0	0	30	0	56	0	21	0		0	0	0	0	40	9	6	0	0	0	6	0	0	0	0
D_0__Eukaryota;D_1__SAR;D_2__Alveolata;D_3__Dinoflagellata;D_5__Dinophysiales;D_6__Sinophysis;D_7__metagenome	H	0	0	0	0	0	0	0	7		0	17	0	0	0	0	0	0	0	0	0	0	0	0	0
D_0__Eukaryota;D_1__SAR;D_2__Alveolata;D_3__Dinoflagellata;D_5__Dinophysiales;D_6__Sinophysis;D_7__uncultured marine eukaryote	H	0	0	14	0	0	0	0	11		0	36	0	0	4	0	0	0	0	0	0	0	0	0	0
D_0__Eukaryota;D_1__SAR;D_2__Alveolata;D_3__Dinoflagellata;D_5__Dinophysiales;D_6__Sinophysis;__	H	0	0	0	0	0	0	0	0		0	0	75	0	0	0	0	0	0	0	5	0	0	2	0
D_0__Eukaryota;D_1__SAR;D_2__Alveolata;D_3__Dinoflagellata;D_5__Gymnodiniphycidae;D_6__Amphidinium;D_7__uncultured eukaryote	M	5	0	69	11	136	0	9	20		70	98	235	177	1011	118	116	780	98	32	132	0	72	14	0
D_0__Eukaryota;D_1__SAR;D_2__Alveolata;D_3__Dinoflagellata;D_5__Gymnodiniphycidae;D_6__Amphidinium;D_7__uncultured marine eukaryote	M	0	0	7	0	18	0	0	0		0	0	0	0	0	0	0	0	0	0	0	0	0	0	0
D_0__Eukaryota;D_1__SAR;D_2__Alveolata;D_3__Dinoflagellata;D_5__Gymnodiniphycidae;D_6__Gyrodinium;Ambiguous_taxa	H	59	3467	2722	77	174	1776	221	787		348	2815	1348	1113	701	901	2721	4674	777	516	331	122	291	229	192
D_0__Eukaryota;D_1__SAR;D_2__Alveolata;D_3__Dinoflagellata;D_5__Gymnodiniphycidae;D_6__Gyrodinium;D_7__uncultured Gyrodinium	H	0	0	0	0	0	0	0	0		0	0	6	0	0	0	0	0	0	0	0	0	0	0	0
D_0__Eukaryota;D_1__SAR;D_2__Alveolata;D_3__Dinoflagellata;D_5__Gymnodiniphycidae;D_6__Gyrodinium;D_7__uncultured marine alveolate	H	0	0	0	0	0	0	0	0		0	0	0	0	0	0	0	0	0	29	0	0	0	0	0
D_0__Eukaryota;D_1__SAR;D_2__Alveolata;D_3__Dinoflagellata;D_5__Gymnodiniphycidae;D_6__Gyrodinium;D_7__uncultured marine dinoflagellate	H	155	27493	1363	0	87	0	91	1463		52	0	42	945	375	1680	535	362	526	582	251	13	728	155	614
D_0__Eukaryota;D_1__SAR;D_2__Alveolata;D_3__Dinoflagellata;D_5__Gymnodiniphycidae;D_6__Gyrodinium;__	H	22	1963	347	50	194	349	1212	68		626	667	1136	1504	1003	644	318	1286	475	437	446	14	199	420	329
D_0__Eukaryota;D_1__SAR;D_2__Alveolata;D_3__Dinoflagellata;D_5__Gymnodiniphycidae;D_6__Katodinium;D_7__uncultured eukaryote	H	0	0	0	0	0	0	0	0		0	5	0	8	0	7	0	12	0	0	9	0	0	9	0
D_0__Eukaryota;D_1__SAR;D_2__Alveolata;D_3__Dinoflagellata;D_5__Gymnodiniphycidae;D_6__uncultured;Ambiguous_taxa	u	0	0	0	0	0	0	0	0		0	0	37	0	0	7	0	9	8	0	0	0	0	3	0
D_0__Eukaryota;D_1__SAR;D_2__Alveolata;D_3__Dinoflagellata;D_5__Gymnodiniphycidae;D_6__uncultured;D_7__uncultured eukaryote	u	0	10	37	0	0	0	24	0		93	31	0	36	0	44	0	161	55	22	0	0	31	28	9
D_0__Eukaryota;D_1__SAR;D_2__Alveolata;D_3__Dinoflagellata;D_5__Gymnodiniphycidae;__;__	u	0	2	0	0	0	0	0	0		0	0	0	0	0	0	0	0	0	0	0	0	0	0	0
D_0__Eukaryota;D_1__SAR;D_2__Alveolata;D_3__Dinoflagellata;D_6__Gonyaulacales;D_7__Alexandrium;Ambiguous_taxa	M	0	0	0	0	9	0	0	0		0	0	0	6	0	0	0	0	0	0	0	0	0	0	0
D_0__Eukaryota;D_1__SAR;D_2__Alveolata;D_3__Dinoflagellata;D_6__Gonyaulacales;D_7__Alexandrium;__	M	0	0	9	3	0	0	0	0		0	56	0	0	0	0	0	9	12	0	0	0	5	0	0
D_0__Eukaryota;D_1__SAR;D_2__Alveolata;D_3__Dinoflagellata;D_6__Gonyaulacales;D_7__Amylax;Ambiguous_taxa	H	0	0	0	0	0	0	0	0		0	0	0	0	0	0	0	0	0	0	4	0	0	0	0
D_0__Eukaryota;D_1__SAR;D_2__Alveolata;D_3__Dinoflagellata;D_6__Gonyaulacales;D_7__Azadinium;Ambiguous_taxa	A	0	82	0	0	0	0	0	0		0	96	409	235	267	96	66	60	0	0	23	0	0	0	60
D_0__Eukaryota;D_1__SAR;D_2__Alveolata;D_3__Dinoflagellata;D_6__Gonyaulacales;D_7__Azadinium;D_8__uncultured eukaryote	A	0	0	0	0	5	0	0	0		0	0	0	0	0	0	0	0	0	0	0	0	0	0	0
D_0__Eukaryota;D_1__SAR;D_2__Alveolata;D_3__Dinoflagellata;D_6__Gonyaulacales;D_7__Fragilidium;Ambiguous_taxa	M	11	0	0	0	0	0	0	0		0	0	0	0	0	0	0	0	0	0	0	0	0	0	0
D_0__Eukaryota;D_1__SAR;D_2__Alveolata;D_3__Dinoflagellata;D_6__Gonyaulacales;D_7__Goniodoma;D_8__Goniodoma polyedricum	A	0	0	0	0	0	0	0	0		0	7	0	0	0	0	0	0	0	0	0	0	0	0	0
D_0__Eukaryota;D_1__SAR;D_2__Alveolata;D_3__Dinoflagellata;D_6__Gonyaulacales;D_7__Gonyaulax;Ambiguous_taxa	M	2367	1457	184	5	26	161	24	1465		38	256	83	0	142	0	282	270	380	59	171	0	39	107	58
D_0__Eukaryota;D_1__SAR;D_2__Alveolata;D_3__Dinoflagellata;D_6__Gonyaulacales;D_7__Gonyaulax;D_8__Gonyaulax fragilis	M	0	0	0	0	44	0	6	0		0	0	68	9	3	0	10	21	0	0	0	0	0	4	0
D_0__Eukaryota;D_1__SAR;D_2__Alveolata;D_3__Dinoflagellata;D_6__Gonyaulacales;D_7__Gonyaulax;D_8__uncultured marine eukaryote	M	0	0	0	0	0	0	0	0		0	0	0	0	0	0	0	0	0	0	0	0	0	0	36
D_0__Eukaryota;D_1__SAR;D_2__Alveolata;D_3__Dinoflagellata;D_6__Gonyaulacales;D_7__Gonyaulax;__	M	0	4	2	0	0	0	0	0		0	0	0	0	0	0	0	0	0	0	0	0	0	0	0
D_0__Eukaryota;D_1__SAR;D_2__Alveolata;D_3__Dinoflagellata;D_6__Gonyaulacales;D_7__Lingulodinium;Ambiguous_taxa	M	0	0	0	0	0	0	0	0		0	0	0	0	3	0	0	0	0	0	0	0	0	0	0
D_0__Eukaryota;D_1__SAR;D_2__Alveolata;D_3__Dinoflagellata;D_6__Gonyaulacales;D_7__Neoceratium;Ambiguous_taxa	M	0	74	343	8	17	92	370	14		0	365	13	1157	35	75	118	783	20	85	31	32	6	59	7
D_0__Eukaryota;D_1__SAR;D_2__Alveolata;D_3__Dinoflagellata;D_6__Gonyaulacales;D_7__Neoceratium;D_8__uncultured eukaryote	M	0	13	6	0	66	0	9	5		71	25	37	77	0	208	25	108	153	18	63	0	40	47	0
D_0__Eukaryota;D_1__SAR;D_2__Alveolata;D_3__Dinoflagellata;D_6__Gonyaulacales;D_7__Ostreopsis;D_8__Ostreopsis cf. ovata	A	0	0	0	0	0	0	0	0		0	0	0	0	0	0	0	0	2	0	0	0	0	0	0
D_0__Eukaryota;D_1__SAR;D_2__Alveolata;D_3__Dinoflagellata;D_6__Gonyaulacales;D_7__Pyrocystis;Ambiguous_taxa	A	0	0	0	0	0	0	0	0		0	0	0	2	0	0	0	0	0	0	0	0	0	0	0
D_0__Eukaryota;D_1__SAR;D_2__Alveolata;D_3__Dinoflagellata;D_6__Gonyaulacales;D_7__Pyrophacus;D_8__Pyrophacus steinii	A	0	0	0	0	0	0	0	0		0	0	11	106	0	0	0	0	0	0	0	0	0	0	0
D_0__Eukaryota;D_1__SAR;D_2__Alveolata;D_3__Dinoflagellata;D_6__Gonyaulacales;__;__	u	0	0	0	0	0	0	0	0		0	0	0	0	0	3	0	0	3	0	0	0	0	0	13
D_0__Eukaryota;D_1__SAR;D_2__Alveolata;D_3__Dinoflagellata;D_6__Gymnodinium clade;Ambiguous_taxa;Ambiguous_taxa	u	355	285	229	178	59	86	229	371		10	28	334	126	15	0	30	25	0	72	68	0	0	0	42
D_0__Eukaryota;D_1__SAR;D_2__Alveolata;D_3__Dinoflagellata;D_6__Gymnodinium clade;D_7__Chytriodinium;Ambiguous_taxa	H	0	0	0	0	0	0	2	0		0	0	0	0	0	0	0	0	0	0	0	0	0	0	0
D_0__Eukaryota;D_1__SAR;D_2__Alveolata;D_3__Dinoflagellata;D_6__Gymnodinium clade;D_7__Erythropsidinium;Ambiguous_taxa	H	55	63	473	130	440	416	179	91		685	1522	518	1285	506	1429	1056	1127	424	321	278	99	278	311	0
D_0__Eukaryota;D_1__SAR;D_2__Alveolata;D_3__Dinoflagellata;D_6__Gymnodinium clade;D_7__Erythropsidinium;D_8__uncultured eukaryote	H	0	195	60	52	0	1080	149	16		0	1781	75	113	0	22	207	1275	0	610	0	11	162	0	22
D_0__Eukaryota;D_1__SAR;D_2__Alveolata;D_3__Dinoflagellata;D_6__Gymnodinium clade;D_7__Erythropsidinium;__	H	0	0	0	0	0	0	45	0		0	0	0	0	0	20	23	0	0	0	0	0	0	0	0
D_0__Eukaryota;D_1__SAR;D_2__Alveolata;D_3__Dinoflagellata;D_6__Gymnodinium clade;D_7__Gymnodinium;D_8__uncultured eukaryote	u	0	0	26	0	0	0	0	0		0	34	0	16	0	0	0	47	0	0	0	0	0	0	0
D_0__Eukaryota;D_1__SAR;D_2__Alveolata;D_3__Dinoflagellata;D_6__Gymnodinium clade;D_7__Paragymnodinium;Ambiguous_taxa	M	0	0	0	0	0	0	0	0		0	0	20	0	27	9	17	0	10	6	0	0	5	0	13
D_0__Eukaryota;D_1__SAR;D_2__Alveolata;D_3__Dinoflagellata;D_6__Gymnodinium clade;D_7__Paragymnodinium;D_8__uncultured eukaryote	M	0	22	59	32	36	0	114	12		86	46	52	28	10	14	15	40	31	51	28	0	58	26	0
D_0__Eukaryota;D_1__SAR;D_2__Alveolata;D_3__Dinoflagellata;D_6__Gymnodinium clade;D_7__Polykrikos;D_8__Polykrikos kofoidii	H	2298	609	337	87	22	0	18	141		83	17	109	6	106	116	121	121	170	34	80	0	9	22	50
D_0__Eukaryota;D_1__SAR;D_2__Alveolata;D_3__Dinoflagellata;D_6__Gymnodinium clade;D_7__Woloszynskia;Ambiguous_taxa	u	0	7	31	0	0	27	0	0		0	0	0	0	0	0	0	0	0	12	0	0	0	0	0
D_0__Eukaryota;D_1__SAR;D_2__Alveolata;D_3__Dinoflagellata;D_6__Gymnodinium clade;D_7__Woloszynskia;D_8__Chytriodinium sp. Atlantic	H	0	0	0	0	0	0	0	0		0	0	0	4	0	0	0	0	0	6	0	0	0	0	0
D_0__Eukaryota;D_1__SAR;D_2__Alveolata;D_3__Dinoflagellata;D_6__Gymnodinium clade;D_7__Woloszynskia;D_8__uncultured eukaryote	u	0	0	0	0	0	0	0	0		0	0	0	0	13	0	0	0	0	0	0	0	0	0	0
D_0__Eukaryota;D_1__SAR;D_2__Alveolata;D_3__Dinoflagellata;D_6__Gymnodinium clade;__;__	u	43	467	406	31	263	25	235	36		69	53	232	316	304	150	152	51	91	178	34	0	132	51	0
D_0__Eukaryota;D_1__SAR;D_2__Alveolata;D_3__Dinoflagellata;D_6__Incertae Sedis;D_7__Akashiwo;Ambiguous_taxa	M	0	0	3	0	0	0	0	0		0	0	0	0	0	0	0	0	7	2	0	0	0	0	0
D_0__Eukaryota;D_1__SAR;D_2__Alveolata;D_3__Dinoflagellata;D_6__Incertae Sedis;D_7__Akashiwo;D_8__uncultured eukaryote	M	0	0	0	0	0	0	0	0		0	0	0	0	0	14	0	23	6	3	0	0	0	5	0
D_0__Eukaryota;D_1__SAR;D_2__Alveolata;D_3__Dinoflagellata;D_6__Incertae Sedis;D_7__Cochlodinium;Ambiguous_taxa	M	0	0	33	0	0	0	25	0		0	0	0	0	17	0	0	0	0	3	0	0	0	0	0
D_0__Eukaryota;D_1__SAR;D_2__Alveolata;D_3__Dinoflagellata;D_6__Incertae Sedis;D_7__Cochlodinium;D_8__uncultured eukaryote	M	0	0	0	0	0	0	2	0		0	0	0	0	0	0	0	4	0	0	0	0	0	0	0
D_0__Eukaryota;D_1__SAR;D_2__Alveolata;D_3__Dinoflagellata;D_6__Kareniaceae;Ambiguous_taxa;Ambiguous_taxa	u	6	84	36	0	16	0	16	0		39	96	0	58	12	46	26	100	83	42	23	0	121	26	18
D_0__Eukaryota;D_1__SAR;D_2__Alveolata;D_3__Dinoflagellata;D_6__Kareniaceae;D_7__Karlodinium;Ambiguous_taxa	M	0	21	0	0	0	0	0	0		57	0	6	0	0	0	18	0	0	0	0	0	0	0	8
D_0__Eukaryota;D_1__SAR;D_2__Alveolata;D_3__Dinoflagellata;D_6__Kareniaceae;D_7__Karlodinium;D_8__uncultured eukaryote	M	0	0	35	0	12	0	0	0		129	15	12	15	0	26	0	43	52	20	11	4	29	64	11
D_0__Eukaryota;D_1__SAR;D_2__Alveolata;D_3__Dinoflagellata;D_6__Kareniaceae;D_7__Karlodinium;D_8__uncultured marine alveolate	M	162	20392	3922	61084	12823	40552	7898	1465		1635	2949	11145	1579	2426	1640	920	602	1038	2491	1665	37	174	1082	6785
D_0__Eukaryota;D_1__SAR;D_2__Alveolata;D_3__Dinoflagellata;D_6__Kareniaceae;D_7__Karlodinium;D_8__uncultured marine picoplankton	M	35	278	213	248	297	35	361	86		1337	507	2718	968	603	604	278	369	305	413	308	0	104	706	368
D_0__Eukaryota;D_1__SAR;D_2__Alveolata;D_3__Dinoflagellata;D_6__Kareniaceae;D_7__Takayama;D_8__uncultured eukaryote	M	0	0	3	0	0	0	0	0		0	4	0	0	0	0	0	0	8	5	0	0	0	0	0
D_0__Eukaryota;D_1__SAR;D_2__Alveolata;D_3__Dinoflagellata;D_6__Peridiniales;D_7__Balechina;Ambiguous_taxa	H	13	0	0	0	0	0	0	0		0	0	0	0	0	0	0	0	0	0	0	0	0	0	0
D_0__Eukaryota;D_1__SAR;D_2__Alveolata;D_3__Dinoflagellata;D_6__Peridiniales;D_7__Heterocapsa;D_8__uncultured eukaryote	M	0	0	15	0	13	0	0	0		29	0	0	13	0	48	0	0	48	0	0	0	0	24	0
D_0__Eukaryota;D_1__SAR;D_2__Alveolata;D_3__Dinoflagellata;D_6__Peridiniales;D_7__Islandinium;Ambiguous_taxa	A	0	14	15	0	5	0	0	0		0	63	0	0	0	0	0	38	13	0	11	0	7	2	24
D_0__Eukaryota;D_1__SAR;D_2__Alveolata;D_3__Dinoflagellata;D_6__Peridiniales;D_7__Peridinium;D_8__uncultured dinoflagellate	u	0	3	0	0	0	0	0	0		0	5	0	0	0	0	0	0	0	0	0	0	0	0	0
D_0__Eukaryota;D_1__SAR;D_2__Alveolata;D_3__Dinoflagellata;D_6__Peridiniales;D_7__Peridinium;D_8__uncultured eukaryote	u	0	0	12	0	0	0	0	0		0	0	0	0	17	0	0	0	6	0	0	0	0	0	9
D_0__Eukaryota;D_1__SAR;D_2__Alveolata;D_3__Dinoflagellata;D_6__Peridiniales;D_7__Protoperidinium;Ambiguous_taxa	H	0	8	0	0	12	0	14	0		0	0	0	0	0	5	0	9	0	0	0	0	13	0	0
D_0__Eukaryota;D_1__SAR;D_2__Alveolata;D_3__Dinoflagellata;D_6__Peridiniales;D_7__Protoperidinium;D_8__Protoperidinium conicum	H	0	2	0	0	0	0	0	0		0	0	0	0	0	0	0	0	0	0	0	0	0	0	0
D_0__Eukaryota;D_1__SAR;D_2__Alveolata;D_3__Dinoflagellata;D_6__Peridiniales;D_7__Protoperidinium;D_8__Protoperidinium elegans	H	0	0	2	0	0	0	0	0		0	0	0	0	0	0	0	0	0	0	0	0	0	0	0
D_0__Eukaryota;D_1__SAR;D_2__Alveolata;D_3__Dinoflagellata;D_6__Peridiniales;D_7__Protoperidinium;D_8__Protoperidinium monovelum	H	0	0	0	0	0	0	0	0		0	60	0	0	6	0	0	7	12	0	0	0	39	13	0
D_0__Eukaryota;D_1__SAR;D_2__Alveolata;D_3__Dinoflagellata;D_6__Peridiniales;D_7__Protoperidinium;D_8__uncultured alveolate	H	0	0	0	0	19	0	0	0		0	0	0	0	3	0	0	0	0	6	0	0	0	0	0
D_0__Eukaryota;D_1__SAR;D_2__Alveolata;D_3__Dinoflagellata;D_6__Peridiniales;D_7__Protoperidinium;D_8__uncultured eukaryote	H	0	0	4	3	16	0	0	0		0	0	0	0	10	0	0	0	0	0	0	0	0	0	0
D_0__Eukaryota;D_1__SAR;D_2__Alveolata;D_3__Dinoflagellata;D_6__Peridiniales;D_7__Scrippsiella lachrymosa	A	13292	7316	709	184	45	56	0	79		0	0	125	0	204	69	333	275	475	0	212	0	0	79	303
D_0__Eukaryota;D_1__SAR;D_2__Alveolata;D_3__Dinoflagellata;D_6__Suessiaceae;Ambiguous_taxa;Ambiguous_taxa	u	0	0	0	0	0	0	0	0		0	17	0	0	0	0	0	0	6	0	0	0	12	0	0
D_0__Eukaryota;D_1__SAR;D_2__Alveolata;D_3__Dinoflagellata;D_6__Suessiaceae;D_7__Biecheleria;D_8__uncultured eukaryote	M	0	44	0	30	32	0	50	0		78	874	41	74	54	16	0	116	159	46	0	13	0	65	47
D_0__Eukaryota;D_1__SAR;D_2__Alveolata;D_3__Dinoflagellata;D_6__Suessiaceae;D_7__Pelagodinium;Ambiguous_taxa	A	130	235	125	870	151	217	345	134		368	68	411	44	41	18	42	35	132	52	105	0	28	75	142
D_0__Eukaryota;D_1__SAR;D_2__Alveolata;D_3__Dinoflagellata;D_6__Suessiaceae;D_7__uncultured;D_8__uncultured eukaryote	u	0	0	0	0	0	0	0	0		0	0	0	0	0	14	0	0	0	0	0	0	0	0	83
D_0__Eukaryota;D_1__SAR;D_2__Alveolata;D_3__Dinoflagellata;D_6__Suessiaceae;__;__	u	72	23	139	281	0	285	0	271		104	158	74	0	0	63	75	0	74	48	189	0	51	34	0
D_0__Eukaryota;D_1__SAR;D_2__Alveolata;D_3__Dinoflagellata;D_6__Thoracosphaeraceae;D_7__Oodinium;D_8__eukaryote clone OLI11027	H	0	0	6	8	365	0	374	8		0	478	1556	20	0	60	8	312	0	18	43	0	0	12	0
D_0__Eukaryota;D_1__SAR;D_2__Alveolata;D_3__Dinoflagellata;D_6__Thoracosphaeraceae;D_7__Oodinium;D_8__uncultured eukaryote	H	0	0	0	0	0	0	0	0		0	22	0	0	0	0	27	134	0	0	0	0	0	0	0
D_0__Eukaryota;D_1__SAR;D_2__Alveolata;D_3__Dinoflagellata;__;__;__	u	5234	9564	6916	2292	3397	5618	7759	3603		4926	7327	8193	7683	6688	4472	3433	7305	3393	2681	2659	173	2204	2271	3917
D_0__Eukaryota;D_1__SAR;D_2__Alveolata;D_3__Protalveolata;D_4__Oxyrrhis;D_5__uncultured marine eukaryote;D_6__uncultured marine eukaryote	H	0	5	0	0	0	0	0	0		0	0	0	0	0	146	8	15	26	0	11	0	0	6	0
H, Heterotroph	32
M, Mixotroph	25
A, Autotroph	9
u, Undistinguishable	23
		St. RT	St. 2	St. 3	St. 4	St. 5	St. 6	St. 7	St. 29		St. 1	St. 9	St. 10	St. 11	St. 12	St. 15	St. 16	St. 18	St. 20	St. 22	St. 24	St. 26	St. 27	St. 28	St. 14
Total	(Number of ASVs)	24401	75256	20202	66311	19360	51220	20618	10485		12970	21163	31558	18880	15669	13388	11353	21686	9773	9311	7461	533	5531	6560	13526
Undistinguishable		5776	10961	8199	2821	4051	6156	8428	4363		6630	7951	9039	8445	7228	4985	3804	8217	4008	3212	3041	179	2980	2670	4273
Autotrophic dinoflagellate (ATD)		13422	7647	849	1054	206	273	345	213		368	234	956	387	512	183	441	408	622	52	351	0	35	156	529
Mixotrophic dinoflagellate (MTD)		2580	22305	4903	61421	13529	40840	8868	3067		3530	5195	14430	4103	4331	2772	1799	3168	2327	3234	2409	86	532	2203	7333
Heterotrophic dinoflagellate (HTD)		2623	34343	6251	1015	1574	3951	2977	2842		2442	7783	7133	5945	3598	5448	5309	9893	2816	2813	1660	268	1984	1531	1391
Undistinguishable	(Percentage)	0.236712	0.14565	0.405851	0.042542	0.209246	0.120187	0.408769	0.416118		0.51118	0.375703	0.286425	0.447299	0.461293	0.372348	0.335066	0.378908	0.410109	0.344968	0.407586	0.335835	0.538781	0.407012	0.31591
Autotrophic dinoflagellate (ATD)		0.550059	0.101613	0.0420255	0.0158948	0.0106405	0.00532995	0.016733	0.0203147		0.0283732	0.011057	0.0302934	0.0204979	0.032676	0.013669	0.0388444	0.018814	0.0636447	0.00558479	0.0470446	0	0.00632797	0.0237805	0.0391099
Mixotrophic dinoflagellate (MTD)		0.105733	0.296388	0.242699	0.926257	0.698812	0.797345	0.43011	0.292513		0.272167	0.245476	0.457253	0.21732	0.276406	0.207051	0.15846	0.146085	0.238105	0.347331	0.322879	0.161351	0.0961851	0.335823	0.542141
Heterotrophic dinoflagellate (HTD)		0.107496	0.456349	0.309425	0.0153067	0.0813017	0.0771378	0.144388	0.271054		0.188281	0.367764	0.226028	0.314883	0.229625	0.406932	0.46763	0.456193	0.288141	0.302116	0.22249	0.502814	0.358705	0.233384	0.102839
